# Supplementary material for: Combined sewer overflows: relating event duration monitoring data to wastewater systems' capacity in England
Source: Royal Society of Chemistry journal article supplement (doi:10.1039/d2ew00637e), 2023-01-01
Supplement: d2ew00637e1.csv [file d2ew00637e1.csv]

	Water Company Name	PERMIT_NUMBER_WWTW	PERMIT_NUMBER_CSO
1	Northumbrian Water	245/A/0712	245/A/0713
2	Northumbrian Water	25/02/1079	25/02/1079
3	Northumbrian Water	222/0844	222/0839
4	Northumbrian Water	222/0862	222/0862
5	Northumbrian Water	223/0931	223/0931
6	Northumbrian Water	25/02/1087	252/E/0273
7	Northumbrian Water	231/1086	231/G/0108
8	Northumbrian Water	25/04/1750	25/04/1750
9	Northumbrian Water	226/1179	226/1179
10	Northumbrian Water	243/1024	243/1024
11	Northumbrian Water	210/1312	210/A/0487
12	Northumbrian Water	242/1070	242/1070
13	Northumbrian Water	226/1119	226/1119
14	Northumbrian Water	25/04/1706	25/04/1706
15	Northumbrian Water	243/1016	243/1016
16	Northumbrian Water	242/1052	242/1052
17	Northumbrian Water	25/01/0920	25/01/0920
18	Northumbrian Water	235/1695	235/1631
19	Northumbrian Water	25/04/1797	25/03/1214
20	Northumbrian Water	235/1695	226/0102
21	Northumbrian Water	234/A/0656	234/D/0005
22	Northumbrian Water	234/A/0656	234/A/0657
23	Northumbrian Water	243/1026	243/1026
24	Northumbrian Water	245/0839	245/0839
25	Northumbrian Water	231/1027	231/1027
26	Northumbrian Water	244/1026	244/1026
27	Northumbrian Water	241/1013	241/1013
28	Northumbrian Water	232/1119	232/1119
29	Northumbrian Water	241/1104	241/1104
30	Northumbrian Water	25/04/1859	25/04/1859
31	Northumbrian Water	25/04/1676	25/04/1676
32	Northumbrian Water	231/1078	231/1078
33	Northumbrian Water	235/1695	226/1090
34	Northumbrian Water	232/1165	232/1165
35	Northumbrian Water	221/1016	221/1016
36	Northumbrian Water	231/1108	231/1108
37	Northumbrian Water	245/1247	245/1247
38	Northumbrian Water	25/04/1773	25/04/1773
39	Northumbrian Water	225/1079	225/A/0861
40	Northumbrian Water	223/0633	223/0633
41	Northumbrian Water	241/1097	241/1097
42	Northumbrian Water	25/02/1108	25/02/1108
43	Northumbrian Water	210/1327	210/1327
44	Northumbrian Water	223/1000	223/1000
45	Northumbrian Water	254/1965	254/0255
46	Northumbrian Water	231/1087	231/1087
47	Northumbrian Water	25/02/1120	252/E/0329
48	Northumbrian Water	235/1695	EPRBB3897EY
49	Northumbrian Water	245/0842	245/0842
50	Northumbrian Water	223/0820	223/0820
51	Northumbrian Water	245/1245	245/0906
52	Northumbrian Water	241/1102	241/1120
53	Northumbrian Water	225/A/0870	225/A/0871
54	Northumbrian Water	235/1695	226/0946
55	Northumbrian Water	223/0991	223/0991
56	Northumbrian Water	235/1695	235/1507
57	Northumbrian Water	235/1695	235/1760
58	Northumbrian Water	25/04/1656	25/04/1656
59	Northumbrian Water	243/0966	241/1125
60	Northumbrian Water	223/0943	223/0943
61	Northumbrian Water	243/0966	242/C/0380
62	Northumbrian Water	231/1071	231/1071
63	Northumbrian Water	226/0927	226/0927
64	Northumbrian Water	235/1695	235/1329
65	Northumbrian Water	235/1695	235/1330
66	Northumbrian Water	222/0864	222/0864
67	Northumbrian Water	243/0968	243/0968
68	Northumbrian Water	244/1027	244/1027
69	Yorkshire Water	27/24/0162	27/20/0160
70	Yorkshire Water	WRA6924	WRA7974
71	Yorkshire Water	3334(SS)	WRA8749
72	Yorkshire Water	WRA6924	WRA7339
73	Yorkshire Water	WRA7409	WRA9174
74	Yorkshire Water	WRA7510	WADC1141
75	Yorkshire Water	WRA6925	WRA8196
76	Yorkshire Water	WRA7409	WRA8636
77	Yorkshire Water	WRA6925	WRA8646
78	Yorkshire Water	2137	NPSWQD010167
79	Yorkshire Water	27/23/0302	WADC1031
80	Yorkshire Water	WRA7409	YWUCD2/45
81	Yorkshire Water	E15	WRA9168
82	Yorkshire Water	C4954	WRA9186
83	Yorkshire Water	431	431
84	Yorkshire Water	C4954	WRA7695
85	Yorkshire Water	2160	WRA9259
86	Yorkshire Water	WRA6924	WRA9295
87	Yorkshire Water	E25	WRA8774
88	Yorkshire Water	E15	YWUCD2/64
89	Yorkshire Water	QR.27/22/0039	3352(SS)
90	Yorkshire Water	27/24/0124	27/24/0452
91	Yorkshire Water	27/24/0124	27/24/0438
92	Yorkshire Water	1586	WADC1142
93	Yorkshire Water	27/23/0264	WADC1121
94	Yorkshire Water	WRA6924	WRA8575
95	Yorkshire Water	27/23/0117	27/23/0286
96	Yorkshire Water	WRA6924	C3961
97	Yorkshire Water	27/25/0078	27/25/0078
98	Yorkshire Water	3332	WRA7929
99	Yorkshire Water	27/24/0124	27/24/0460
100	Yorkshire Water	WRA7637	WADC1075
101	Yorkshire Water	WRA7409	YWUCD2/60
102	Yorkshire Water	WRA7172	WRA8453
103	Yorkshire Water	27/24/0124	2908
104	Yorkshire Water	WRA6680	2378
105	Yorkshire Water	27/25/0083	YWUCD2/47
106	Yorkshire Water	E15	WRA9291
107	Yorkshire Water	016950041	WRA9101
108	Yorkshire Water	WRA6924	1281
109	Yorkshire Water	C4569	WADC1161
110	Yorkshire Water	27/24/0124	27/24/0424
111	Yorkshire Water	2838	WADC908
112	Yorkshire Water	WRA6924	WADC1025
113	Yorkshire Water	2255	WRA8445
114	Yorkshire Water	E10	C4871
115	Yorkshire Water	WRA6924	1008
116	Yorkshire Water	27/27/0155	C4964
117	Yorkshire Water	27/24/0124	27/24/0455
118	Yorkshire Water	NPSWQD009922	NPSWQD009922
119	Yorkshire Water	WRA6924	WA5854
120	Yorkshire Water	QR.27/21/0047	27/21/0015
121	Yorkshire Water	E10	WRA7958
122	Yorkshire Water	E25	WRA9196
123	Yorkshire Water	C4106	WRA9200
124	Yorkshire Water	WRA6924	WRA7970
125	Yorkshire Water	E25	WRA7998
126	Yorkshire Water	27/24/0124	27/24/0427
127	Yorkshire Water	E15	WRA9169
128	Yorkshire Water	QR.27/27/0040	27/28/0207
129	Yorkshire Water	27/24/0124	1282
130	Yorkshire Water	WRA6924	WRA8179
131	Yorkshire Water	E25	WRA9130
132	Yorkshire Water	WRA7409	WRA8435
133	Yorkshire Water	WRA7510	WRA8413
134	Yorkshire Water	WRA7510	2490
135	Southern Water	W00511	A01467
136	Southern Water	A01112	A00717
137	Southern Water	A00805	A00902
138	Southern Water	W00131	W00295
139	Southern Water	A00726	A01299
140	Southern Water	A00576	W00418
141	Southern Water	A01102	A00606
142	Southern Water	W00518	A00443
143	Southern Water	A00726	A01286
144	Southern Water	W00552	A01439
145	Southern Water	W00471	W00471
146	Southern Water	W00131	A01445
147	Southern Water	A00726	A02504
148	Southern Water	A01106	A01442A
149	Southern Water	W00390	A00898
150	Severn Trent Water	T/05/36081/R	T/05/35793/O
151	Severn Trent Water	T/01/36052/R	T/01/35719/O
152	Severn Trent Water	T/64/45170/R	T/64/21890/O
153	Severn Trent Water	S/05/56082/R	S/05/55671/O
154	Severn Trent Water	T/03/36222/R	TSC399
155	Severn Trent Water	T/24/35915/R	T/24/21773/O
156	Severn Trent Water	S/19/26007/R	S/17/25685/O
157	Severn Trent Water	S/09/55956/R	S/09/55956/R
158	Severn Trent Water	S/06/55506/R	S/06/55681/O
159	Severn Trent Water	EPRQB3699WX	T/64/45552/R
160	Severn Trent Water	S/04/56083/R	S/04/55874/O
161	Severn Trent Water	S/04/55883/R	S/04/55714/O
162	Severn Trent Water	T/01/36052/R	T/01/35967/O
163	Severn Trent Water	T/01/36052/R	T/01/36022/O
164	Severn Trent Water	S/16/26289/R	S/16/26289/R
165	Severn Trent Water	T/24/36133/R	T/24/35226/O
166	Severn Trent Water	T/20/36246/R	T/20/30308/O
167	Severn Trent Water	S/09/56189/R	S/09/56165/R
168	Severn Trent Water	T/48/45678/R	T/36/46093/O
169	Severn Trent Water	T/08/36220/R	T/03/35596/O
170	Severn Trent Water	S/06/55227/R	S/06/20319/O
171	Severn Trent Water	S/06/55232/R	S/06/21366/O
172	Severn Trent Water	T/01/36052/R	T/01/30327/O
173	Severn Trent Water	T/20/36246/R	T/20/30034/O
174	Severn Trent Water	S/20/26262/R	S/20/25506/O
175	Severn Trent Water	S/06/56074/R	S/08/50205/O
176	Severn Trent Water	T/64/45170/R	T/64/46094/O
177	Severn Trent Water	T/10/36212/R	T/12/21954/O
178	South West Water	201967	202383
179	South West Water	DRA 248	NRA-SW-2866
180	South West Water	302530	303432
181	South West Water	302707	302680
182	South West Water	303347	301711
183	South West Water	201967	202384
184	South West Water	202463	201725
185	South West Water	201437	201437
186	South West Water	NRA-SW-3983	203083
187	Wessex Water	101886	100631
188	Wessex Water	070053	070916
189	Wessex Water	401354	400793
190	Thames Water	CNTD.0001	CTCR.2090
191	Thames Water	CTCR.1776	CTCR.1777
192	Thames Water	CSSC.2470	TEMP.2504
193	Thames Water	CNTD.0067	TEMP.2537
194	Thames Water	CNTD.0081	CTCR.1919
195	Thames Water	CSSA.0360	TEMP.2552
196	Thames Water	CTCR.2011	NPSWQD002614
197	Thames Water	CSSA.0360	CSAB.0579
198	Thames Water	CNTD.0070	TEMP.2811
199	Thames Water	CTCR.2150	CTCR.1839
200	Thames Water	CSSC.2317	CTCR.1932
201	Thames Water	CSSC.1455	TEMP.3006
202	Northumbrian Water	226/1179	226/1075
203	Northumbrian Water	254/1966	255/1095
204	Northumbrian Water	25/04/1751	254/0981
205	Northumbrian Water	25/04/1656	254/C/0427
206	Northumbrian Water	235/1695	235/1729
207	Yorkshire Water	27/28/0195	YWUCD1/13
208	Yorkshire Water	QR.27/27/0040	27/27/0101
209	Yorkshire Water	QR.27/27/0040	27/27/0078
210	Yorkshire Water	QR.27/21/0031	27/21/0119
211	Yorkshire Water	27/25/0118	27/25/0085
212	Yorkshire Water	27/27/0082	WADC375
213	Southern Water	W00288	A00668
214	Southern Water	W00518	A00247
215	Southern Water	A00726	A00700
216	Southern Water	W00006	A00612
217	Southern Water	W00587	A00922
218	Southern Water	A01112	A01112
219	Southern Water	W00542	A00037
220	Southern Water	W00131	W00266
221	Southern Water	A00154	W00291
222	Southern Water	W00131	A00342
223	Southern Water	A00857	W00334
224	Southern Water	W00131	A00877
225	Southern Water	A00857	A01263
226	Southern Water	A00726	A00851
227	Southern Water	W00037	A00830
228	Southern Water	A00857	A00741
229	Southern Water	A00751	A01310
230	Southern Water	W00368	A00822
231	Southern Water	A00805	A00825
232	Southern Water	A00726	P05475
233	Southern Water	W00358	S01642
234	Southern Water	W00480	A00828
235	Southern Water	W00006	W0264A
236	Southern Water	W00013	A01251
237	Southern Water	W00015	A00714
238	Southern Water	A00726	A00886
239	Southern Water	CNTW.0531	K02058
240	Southern Water	CNTW.0531	A00004
241	Southern Water	W00131	H02827
242	Southern Water	A00726	A00815
243	Southern Water	A00751	W00280
244	Southern Water	W00505	A00810
245	Southern Water	W00288	A00024
246	Southern Water	W00131	W00290
247	Southern Water	W00131	W00276
248	Southern Water	A01106	W00426
249	Southern Water	W00131	W00289
250	Southern Water	A00726	A00888
251	Southern Water	W00354	W00450
252	Southern Water	A00787	A0788A
253	Southern Water	W00360	S01965
254	Southern Water	W00006	A00613
255	Southern Water	W00008	W00346
256	Southern Water	A00726	A00703
257	Southern Water	W00383	S01912
258	Southern Water	W00338	A01118
259	Southern Water	W00131	A00352
260	Southern Water	A00787	A01262
261	Southern Water	W00020	W00417
262	Severn Trent Water	S/03/55974/R	TSC3009
263	Severn Trent Water	S/15/26435/R	TSC3360
264	Severn Trent Water	S/17/26480/R	TSC3039
265	Severn Trent Water	S/02/55802/R	TSC4037
266	Severn Trent Water	T/69/46017/R	TSC3683
267	Severn Trent Water	T/38/45845/R	TSC3086
268	Severn Trent Water	S/20/26440/R	TSC4079
269	Severn Trent Water	T/69/46017/R	TSC3286
270	Severn Trent Water	EPRWB3435AD	TSC3084
271	Severn Trent Water	T/03/36222/R	TSC3227
272	Severn Trent Water	S/20/26410/R	TSC3241
273	Severn Trent Water	T/02/35730/R	TSC3280
274	Severn Trent Water	T/64/45766/R	TSC3920
275	Severn Trent Water	T/67/45555/R	TSC3221
276	Severn Trent Water	S/01/55211/R	S/03/55151/O
277	Severn Trent Water	T/57/46075/R	T/57/03613/O
278	Severn Trent Water	T/51/45910/R	T/51/01368/O
279	Severn Trent Water	S/12/26557/R	TSC3453
280	Severn Trent Water	S/15/26435/R	TSC3461
281	Severn Trent Water	T/41/45580/R	TSC3901
282	Severn Trent Water	S/20/26440/R	TSC3962
283	Severn Trent Water	S/12/26162/R	TSC3481
284	Severn Trent Water	S/10/26528/R	TSC317
285	Severn Trent Water	T/01/36221/R	TSC3747
286	Severn Trent Water	S/02/56070/R	TSC3863
287	Severn Trent Water	S/21/26028/R	TSC3379
288	Severn Trent Water	T/16/35777/R	T/16/07864/O
289	Severn Trent Water	S/06/55232/R	TSC3591
290	Severn Trent Water	T/82/45052/R	TSC3082
291	Severn Trent Water	T/33/36107/R	TSC3889
292	Severn Trent Water	T/40/08170/R	TSC3301
293	Severn Trent Water	T/40/08170/R	TSC3639
294	Severn Trent Water	T/69/45952/R	TSC3175
295	Severn Trent Water	T/69/45785/R	TSC4009
296	Severn Trent Water	S/10/25890/R	TSC3277
297	Severn Trent Water	T/69/46017/R	TSC3621
298	Severn Trent Water	T/69/46017/R	TSC3854
299	Severn Trent Water	T/76/45916/R	TSC3125
300	Severn Trent Water	T/02/35312/S	TSC3801
301	Severn Trent Water	T/05/36077/R	TSC3966
302	Severn Trent Water	T/19/36017/R	TSC3881
303	Severn Trent Water	S/02/56373/R	TSC3914
304	Severn Trent Water	S/02/56373/R	TSC4101
305	Severn Trent Water	T/69/45785/R	TSC3997
306	Severn Trent Water	T/68/45770/R	TSC3625
307	Severn Trent Water	T/04/36032/R	TSC3157
308	Severn Trent Water	T/69/45554/R	TSC3626
309	Severn Trent Water	S/09/55831/R	TSC3190
310	Severn Trent Water	S/04/56016/R	S/04/55250/O
311	Severn Trent Water	T/30/36067/R	TSC4004
312	Severn Trent Water	T/21/35970/R	TSC3577
313	Severn Trent Water	S/06/55227/R	TSC4072
314	Severn Trent Water	T/69/45349/R	TSC3645
315	South West Water	DRA 1062	201602
316	South West Water	203812	201568
317	South West Water	NRA-SW-6984	201571
318	South West Water	202475	201538
319	South West Water	200976	201583
320	South West Water	203388	201574
321	South West Water	202009	NRA-SW-2863
322	South West Water	202222	DRA 547
323	South West Water	202009	203334
324	South West Water	203792	200887
325	South West Water	200976	200226
326	South West Water	303452	303453
327	South West Water	203442	2898/22
328	South West Water	302707	301566
329	South West Water	202475	201536
330	South West Water	200976	200236/PE/01
331	South West Water	DRA 248	201509
332	South West Water	202367	002606/PE/01
333	South West Water	003174/FU/02	200118/PE/01
334	South West Water	203406	202150
335	South West Water	NRA-SW-6984	201572
336	South West Water	202009	201601
337	South West Water	203080	201603
338	South West Water	200976	200231/PE/01
339	South West Water	302642	301546
340	South West Water	NRA-SW-3983	203147
341	South West Water	302642	303020
342	South West Water	NRA-SW-6984	201573
343	South West Water	200819	201450
344	South West Water	203812	201569
345	South West Water	302506	302831
346	South West Water	203080	201508
347	South West Water	NRA-SW-5475	301576
348	South West Water	200261/FN/01	NRA-SW-2698
349	South West Water	NRA-SW-0782	301531
350	South West Water	202475	201550
351	Wessex Water	070063	071143
352	Wessex Water	040014	401227
353	Wessex Water	102107	010665
354	Wessex Water	072054	101203
355	Wessex Water	042479	040861
356	Wessex Water	042451	041980
357	Wessex Water	100930	082162
358	Wessex Water	100930	071342
359	Wessex Water	100930	071343
360	Wessex Water	102107	021635
361	Wessex Water	102107	012020
362	Wessex Water	010047	011485
363	Wessex Water	401065	040821
364	Wessex Water	401625	042371
365	Wessex Water	401068	043190
366	Wessex Water	100930	072076
367	Wessex Water	101049	071176
368	Wessex Water	102272	010300
369	Wessex Water	100386	071179
370	Wessex Water	401068	041948
371	Wessex Water	040111	040112
372	Wessex Water	070063	071157
373	Wessex Water	070063	071163
374	Wessex Water	070063	071164
375	Wessex Water	041324	401118
376	Wessex Water	100288	013464
377	Wessex Water	070073	070796
378	Wessex Water	401354	400792
379	Wessex Water	401354	051289
380	Wessex Water	401354	400742
381	Wessex Water	401065	040459
382	Wessex Water	401354	400718
383	Wessex Water	401354	400849
384	Wessex Water	401354	400790
385	Wessex Water	401354	051302
386	Wessex Water	401354	041005
387	Wessex Water	401354	051301
388	Wessex Water	401354	401620
389	Wessex Water	100385	071587
390	Wessex Water	100385	070308
391	Wessex Water	400622	040686
392	Wessex Water	102272	011904
393	Wessex Water	EPRMP3728GG	072077
394	Wessex Water	102107	011540
395	Wessex Water	102153	021630
396	Wessex Water	102162	070975
397	Wessex Water	102257	070804
398	Wessex Water	100930	101712
399	Wessex Water	400622	401218
400	Wessex Water	401065	042514
401	Thames Water	CTCR.0709	CAWM.0064
402	Northumbrian Water	25/04/1611	254/1512
403	Northumbrian Water	255/0736	255/5020
404	Yorkshire Water	C4954	3317
405	Yorkshire Water	C4954	C4237
406	Southern Water	A00720	EPRDB3797AW
407	Southern Water	A00720	EPRDB3796RK
408	Southern Water	A00720	EPRDB3797RH
409	Southern Water	A00720	EPRDB3797EY
410	Southern Water	A00720	EPRDB3796WZ
411	Severn Trent Water	T/03/20783/R	T/03/00310/O
412	Severn Trent Water	T/36/45984/R	T/36/45984/R
413	Severn Trent Water	T/30/36067/R	EPRHB3897RV
414	Severn Trent Water	T/70/46165/R	EPRJB3497RH
415	Severn Trent Water	T/12/36068/R	TSC534
416	Severn Trent Water	T/12/36068/R	EPRHB3991NS
417	Severn Trent Water	NPSWQD008782	NPSWQD008782
418	Severn Trent Water	EPRWB3535AJ	EPRWB3535AJ
419	Severn Trent Water	EPRWB3499NQ	T/27/35329/O
420	South West Water	003101/FN/01	003101/SS/01
421	South West Water	200356/FN/01	200356/SF/01
422	South West Water	NRA-SW-0782	301819
423	South West Water	200976	200227/CS/01
424	South West Water	NRA-SW-7829/FN/1	NRA-SW-7829/SS/1
425	South West Water	301918	300525/CS/01
426	South West Water	032738/FN/02	032738/FN/02
427	Southern Water	W00131	EPRGB3099NQ
428	United Utilities	017470166	017480451
429	United Utilities	016940143	01TRA0023
430	United Utilities	017160064	017081188
431	United Utilities	017470166	01BRW0041
432	United Utilities	016950033	016950033
433	United Utilities	016940168	016940168
434	United Utilities	017470166	01BRW0035
435	United Utilities	017570068	017570068
436	United Utilities	017470166	01BRW0039
437	United Utilities	017470166	01BRW0031
438	United Utilities	017470166	01BRW0032
439	United Utilities	016940174	016940174
440	United Utilities	017470166	01BRW0036
441	United Utilities	016950033	01BRY0075
442	United Utilities	016993400	016881729
443	United Utilities	017370024	017370024
444	United Utilities	016940143	01MAN0108
445	United Utilities	017670090	017670090
446	United Utilities	016950032	016950032
447	United Utilities	016940143	01MAN0170
448	United Utilities	017570041	017570041
449	United Utilities	016940089	01TAM0088
450	United Utilities	016950033	01BRY0063
451	United Utilities	016910009	01MAC0055
452	United Utilities	016950042	016950042
453	United Utilities	017570044	01ALL0085
454	United Utilities	016910009	01MAC0112
455	United Utilities	016940150	01SAL0114
456	United Utilities	016983319	01ROC0097
457	United Utilities	016940175	016940175
458	United Utilities	016983122	01WAR0061
459	United Utilities	016940151	01STK0017
460	United Utilities	017160008	01HYN0027
461	United Utilities	016983319	01ROC0069
462	United Utilities	016810049	016810049
463	United Utilities	016940087	01TAM0140
464	United Utilities	016920134	01WIG0057
465	United Utilities	016940087	01TAM0006
466	United Utilities	016940087	01TAM0078
467	United Utilities	017160065	01SRI0024
468	United Utilities	016940143	01MAN0199
469	United Utilities	017050012	01CHR0057
470	United Utilities	016940088	016940088
471	United Utilities	016910007	016910007
472	United Utilities	016810030	01ELL0017
473	United Utilities	016910009	016910009
474	United Utilities	016940089	016940089
475	United Utilities	017050012	01BOL0074
476	United Utilities	017670075	017680313
477	United Utilities	016950034	01ROC0134
478	United Utilities	016810099	016810821
479	United Utilities	016910009	01MAC0054
480	United Utilities	016940141	016940141
481	United Utilities	016940148	01TRA0046
482	United Utilities	017470038	01COP0067
483	United Utilities	016920134	01WIG0014
484	United Utilities	016983122	01WAR0008
485	United Utilities	016940143	01TRA0001
486	United Utilities	016940143	01MAN0159
487	United Utilities	016940087	016993917
488	United Utilities	016910006	016910006
489	United Utilities	016940143	01MAN0377
490	United Utilities	016983122	01WAR0074
491	United Utilities	016950041	01ROC0066
492	United Utilities	016940150	01SAL0092
493	United Utilities	017160008	01RIB0021
494	United Utilities	017160049	01RIB0047
495	United Utilities	016810099	01VRY0116
496	United Utilities	016910006	01VRY0094
497	United Utilities	016983319	01ROC0091
498	United Utilities	016940150	01SAL0112
499	United Utilities	017020107	01WLN0027
500	United Utilities	016810099	01VRY0079
501	United Utilities	016983122	01WAR0076
502	United Utilities	016940151	01STK0005
503	United Utilities	016940148	01TRA0047
504	United Utilities	017160006	01PEN0004
505	United Utilities	016940150	01SAL0101
506	United Utilities	017670075	01CAR0017
507	United Utilities	017190565	01RIB0050
508	United Utilities	016940150	01SAL0150
509	United Utilities	017160040	01RIB0009
510	United Utilities	016940183	016940183
511	United Utilities	016940003	01TRA0050
512	United Utilities	016920130	01STH0052
513	United Utilities	016940184	016940184
514	United Utilities	017160049	01BBN0067
515	United Utilities	016920135	01WIG0086
516	United Utilities	017030100	01SEF0082
517	United Utilities	016993399	01WIR0041
518	United Utilities	017370081	017390187
519	United Utilities	016930486	01WLN0013
520	United Utilities	017480324	01COP0009
521	United Utilities	017060019	01SRI0036
522	United Utilities	016930486	017081312
523	United Utilities	017030002	01WLN0017
524	United Utilities	017670049	017680348
525	United Utilities	017480324	017480325
526	United Utilities	017480324	01COP0008
527	United Utilities	016820128	01WAR0032
528	United Utilities	016920126	01WIG0183
529	United Utilities	017030014	017091039
530	United Utilities	016940150	01SAL0033
531	United Utilities	016920130	01STH0087
532	United Utilities	016930114	016930114
533	United Utilities	017160047	017160047
534	United Utilities	016950038	016983315
535	United Utilities	017370100	01LAK0008
536	United Utilities	016810083	01CON0087
537	United Utilities	017260046	01WYR0038
538	United Utilities	017160049	01HYN0048
539	United Utilities	016920350	01WIG0038
540	Severn Trent Water	S/15/26435/R	S/15/26435/R
541	Northumbrian Water	245/1243	245/1243
542	Yorkshire Water	E25	WRA7562
543	Yorkshire Water	E741(SS)	E741(SS)
544	Southern Water	A01106	W00355
545	Wessex Water	400435	400435
546	Severn Trent Water	S/04/55141/R	EPRHB3898EU
547	Southern Water	A00726	EPRAB3094EJ
548	Wessex Water	101431	071825
549	United Utilities	017470166	01BRW0037
550	United Utilities	017470074	017470074
551	United Utilities	017160025	01BBN0105
552	United Utilities	016910009	01MAC0056
553	United Utilities	016983319	01ROC0062
554	United Utilities	016983268	016983268
555	United Utilities	016940087	016940087
556	United Utilities	016940149	016940149
557	Anglian Water	AW4NF562X	AW4NF928X
558	Anglian Water	AEETS12128	AW4TS12083
559	Anglian Water	ASECS12405	ASETS16994
560	Anglian Water	ASENF10453	ASENF10453
561	Anglian Water	AW4TF1789	EPREB3297AK
562	Anglian Water	AW5NF809	AWNNF2321
563	Anglian Water	AWCNF1106	AW1NF95
564	Anglian Water	AW5NF768	AW5NF2117
565	Anglian Water	AW3TS514	ANNTS13726
566	Anglian Water	AW4NF625	AW4NF1764
567	Anglian Water	AW5NF809	AWNNF13662
568	Anglian Water	AW3NFF1300	ANNNF13452
569	Anglian Water	AEECS12400	ASECS12236
570	Anglian Water	AW2TSE35766	AW2NFE08784
571	Anglian Water	AW2TSE35766	ASENF12382
572	Anglian Water	ASENF1136	AW2NFE10884
573	Anglian Water	AECNF1098	AW4NF193X
574	Anglian Water	AW2NFE14065	AW2NFE05472
575	Anglian Water	AEENF1312	AW4NF894X
576	Anglian Water	AEENF1312	AW4NF895X
577	Anglian Water	CASM.0340	AW2NFE12684
578	Anglian Water	ASETS10380	AW4TS757X
579	Anglian Water	ASETS1320	AW2NFE08984
580	Anglian Water	AW5NF2030	AW5NF2030
581	Anglian Water	CASM.0340	CASM.0340
582	South West Water	003269	003269
583	South West Water	202669	002878
584	Wessex Water	070006	070006
585	Wessex Water	070019	070019
586	Wessex Water	070154	070154
587	Wessex Water	070053	070053
588	Wessex Water	010299	010299
589	Wessex Water	040040	040040
590	Wessex Water	072493	072493
591	Wessex Water	040049	040049
592	Wessex Water	010054	010054
593	Wessex Water	040862	040862
594	Wessex Water	070086	070086
595	Wessex Water	072344	072344
596	Wessex Water	010092	010092
597	Wessex Water	041658	041658
598	Wessex Water	043204	043204
599	Wessex Water	010265	010265
600	Wessex Water	072317	072317
601	Wessex Water	070099	070099
602	Wessex Water	071977	071977
603	Wessex Water	070130	070130
604	Anglian Water	AW3NFF1300	AW3NFF1300
605	Northumbrian Water	252/0364	252/0364
606	Northumbrian Water	252/0366	252/0366
607	Severn Trent Water	S/04/56001/R	S/04/56001/R
608	Severn Trent Water	S/05/56082/R	S/05/56082/R
609	United Utilities	017670112	017670112
610	Yorkshire Water	COPA/2643	COPA/2643
611	Anglian Water	AW4CS12011	AW4CS12011
612	Anglian Water	ANNNF10345	ANNNF10345
613	Anglian Water	AWNNF13072	AWNNF13072
614	Anglian Water	AW5NF5222	AW5NF5222
615	Anglian Water	AW5NF178	AW5NF178
616	Anglian Water	AW4NF300X	AW4NF300X
617	Anglian Water	AWNNF13396	AWNNF13396
618	Anglian Water	AW3NFF654	AW3NFF654
619	Anglian Water	AW5NF566	AW5NF566
620	Anglian Water	AWCNF1178	AWCNF1178
621	Anglian Water	AW5TS742	AW5TS742
622	Northumbrian Water	210/0899	210/0899
623	Northumbrian Water	223/0995	223/0995
624	Northumbrian Water	245/1244	245/1244
625	Severn Trent Water	T/02/36078/R	T/02/36078/R
626	Southern Water	W00069	W00069
627	South West Water	NRA-SW-6964	NRA-SW-6964
628	South West Water	203887	203887
629	South West Water	NRA-SW-6747	NRA-SW-6747
630	South West Water	DRA 1382	DRA 1382
631	South West Water	DRA 1538	DRA 1538
632	South West Water	002728/FN/01	002728/FN/01
633	South West Water	202474	202474
634	South West Water	303090	303090
635	South West Water	303089	303089
636	South West Water	NRA-SW-0247	NRA-SW-0247
637	South West Water	NRA-SW-0411	NRA-SW-0411
638	South West Water	NRA-SW-6685	NRA-SW-6685
639	South West Water	NRA-SW-0423	NRA-SW-0423
640	South West Water	NRA-SW-2877	NRA-SW-2877
641	United Utilities	016810099	016810099
642	Yorkshire Water	QR.27/23/0100	QR.27/23/0100
643	Northumbrian Water	223/0419	223/0419
644	Northumbrian Water	225/1031	225/1031
645	South West Water	NRA-SW-7808	NRA-SW-7808
646	South West Water	NRA-SW-6627	NRA-SW-6627
647	South West Water	NRA-SW-6965	NRA-SW-6965
648	United Utilities	016940133	016940133
649	United Utilities	016920130	016920130
650	Wessex Water	401050	401050
651	South West Water	NRA-SW-7828	NRA-SW-7828
652	South West Water	200400	200400
653	South West Water	NRA-SW-6619	NRA-SW-6619
654	Anglian Water	AW1NF2723	AW1NF2723
655	Anglian Water	AW1NF1250	AW1NF1250
656	Anglian Water	AW5NF694	AW5NF694
657	Anglian Water	ASETS10533	ASETS10533
658	Anglian Water	AEECS12404	AEECS12404
659	Anglian Water	CNTW.0794	CNTW.0794
660	Anglian Water	AEECS12415	AEECS12415
661	Anglian Water	AWNNF13532	AWNNF13532
662	Anglian Water	AWNNF13345	AWNNF13345
663	Anglian Water	ANNTS13654	ANNTS13654
664	Anglian Water	ANNCS13577	ANNCS13577
665	Anglian Water	AEECS12400	AEECS12400
666	Anglian Water	AWNNF13148	AWNNF13148
667	Anglian Water	ASETS10531	ASETS10531
668	Anglian Water	AW5NF5226	AW5NF5226
669	Anglian Water	AEECS12411	AEECS12411
670	Anglian Water	ASETS1532	ASETS1532
671	Anglian Water	ASENF1543	ASENF1543
672	Anglian Water	AWNNF13310	AWNNF13310
673	Northumbrian Water	25/02/1080	25/02/1080
674	Northumbrian Water	221/1035	221/1035
675	Northumbrian Water	243/0970	243/0970
676	Northumbrian Water	253/1277	253/1277
677	Northumbrian Water	254/1920	254/1920
678	Northumbrian Water	25/04/1800	25/04/1800
679	Northumbrian Water	244/1006	244/1006
680	Northumbrian Water	221/0912	221/0912
681	Northumbrian Water	221/1056	221/1056
682	Northumbrian Water	25/04/1758	25/04/1758
683	Northumbrian Water	256/1062	256/1062
684	Northumbrian Water	210/A/0849	210/A/0849
685	Northumbrian Water	223/0990	223/0990
686	Northumbrian Water	255/1145	255/1145
687	Northumbrian Water	210/0887	210/0887
688	Northumbrian Water	232/1155	232/1155
689	Northumbrian Water	210/A/0854	210/A/0854
690	Northumbrian Water	232/1156	232/1156
691	Northumbrian Water	25/01/0919	25/01/0919
692	Northumbrian Water	25/06/1010	25/06/1010
693	Northumbrian Water	242/1071	242/1071
694	Northumbrian Water	241/1145	241/1145
695	Northumbrian Water	25/03/1235	25/03/1235
696	Northumbrian Water	255/1125	255/1125
697	Northumbrian Water	254/1966	254/1966
698	Northumbrian Water	232/1147	232/1147
699	Northumbrian Water	224/0992	224/0992
700	Northumbrian Water	231/0271	231/0271
701	Northumbrian Water	210/1275	210/1275
702	Severn Trent Water	S/13/25745/R	S/13/25745/R
703	Severn Trent Water	S/09/56086/R	S/09/56086/R
704	Severn Trent Water	S/13/25884/R	S/13/25884/R
705	Severn Trent Water	S/13/26230/R	S/13/26230/R
706	Severn Trent Water	S/17/25770/R	S/17/25770/R
707	Severn Trent Water	S/18/25752/R	S/18/25752/R
708	Severn Trent Water	S/18/25840/R	S/18/25840/R
709	Severn Trent Water	T/21/35938/R	T/21/35938/R
710	Severn Trent Water	T/24/35915/R	T/24/35915/R
711	Severn Trent Water	T/33/35620/R	T/33/35620/R
712	Severn Trent Water	T/34/35859/R	T/34/35859/R
713	Severn Trent Water	T/34/36002/R	T/34/36002/R
714	Severn Trent Water	T/41/45651/R	T/41/45651/R
715	Severn Trent Water	T/41/45762/R	T/41/45762/R
716	Severn Trent Water	T/49/45285/R	T/49/45285/R
717	Severn Trent Water	T/50/45544/R	T/50/45544/R
718	Severn Trent Water	T/55/45545/R	T/55/45545/R
719	Severn Trent Water	S/18/26164/R	S/18/26164/R
720	Severn Trent Water	NPSWQD002550	NPSWQD002550
721	Severn Trent Water	S/02/55348/R	S/02/55348/R
722	Severn Trent Water	S/02/55952/R	S/02/55952/R
723	Severn Trent Water	S/04/56026/R	S/04/56026/R
724	Severn Trent Water	S/04/56177/R	S/04/56177/R
725	Severn Trent Water	S/05/56191/R	S/05/56191/R
726	Severn Trent Water	S/06/55931/R	S/06/55931/R
727	Severn Trent Water	S/08/25823/R	S/08/25823/R
728	Severn Trent Water	S/08/26508/R	S/08/26508/R
729	Severn Trent Water	S/08/56181/R	S/08/56181/R
730	Severn Trent Water	S/09/50131/R	S/09/50131/R
731	Severn Trent Water	S/09/55357/R	S/09/55357/R
732	Severn Trent Water	S/09/55935/R	S/09/55935/R
733	Severn Trent Water	S/09/56129/R	S/09/56129/R
734	Severn Trent Water	S/09/56139/R	S/09/56139/R
735	Severn Trent Water	S/10/25784/R	S/10/25784/R
736	Severn Trent Water	S/10/25817/R	S/10/25817/R
737	Severn Trent Water	S/10/26277/R	S/10/26277/R
738	Severn Trent Water	S/12/25831/R	S/12/25831/R
739	Severn Trent Water	S/13/25818/R	S/13/25818/R
740	Severn Trent Water	S/13/25835/R	S/13/25835/R
741	Severn Trent Water	S/13/25874/R	S/13/25874/R
742	Severn Trent Water	S/14/26229/R	S/14/26229/R
743	Severn Trent Water	S/15/25830/R	S/15/25830/R
744	Severn Trent Water	S/15/26102/R	S/15/26102/R
745	Severn Trent Water	S/17/25849/R	S/17/25849/R
746	Severn Trent Water	S/17/25865/R	S/17/25865/R
747	Severn Trent Water	S/17/25981/R	S/17/25981/R
748	Severn Trent Water	S/17/26098/R	S/17/26098/R
749	Severn Trent Water	S/19/25309/R	S/19/25309/R
750	Severn Trent Water	S/19/26264/R	S/19/26264/R
751	Severn Trent Water	S/21/26211/R	S/21/26211/R
752	Severn Trent Water	S/22/26628/R	S/22/26628/R
753	Severn Trent Water	T/02/35582/R	T/02/35582/R
754	Severn Trent Water	T/02/36155/R	T/02/36155/R
755	Severn Trent Water	T/07/35741/R	T/07/35741/R
756	Severn Trent Water	T/07/35744/R	T/07/35744/R
757	Severn Trent Water	T/15/35759/R	T/15/35759/R
758	Severn Trent Water	T/25/35877/R	T/25/35877/R
759	Severn Trent Water	T/26/35919/R	T/26/35919/R
760	Severn Trent Water	T/29/35579/R	T/29/35579/R
761	Severn Trent Water	T/33/35576/R	T/33/35576/R
762	Severn Trent Water	T/38/45929/R	T/38/45929/R
763	Severn Trent Water	T/41/45538/R	T/41/45538/R
764	Severn Trent Water	T/50/45550/R	T/50/45550/R
765	Severn Trent Water	T/51/45517/R	T/51/45517/R
766	Severn Trent Water	T/51/46383/R	T/51/46383/R
767	Severn Trent Water	T/54/45286/R	T/54/45286/R
768	Severn Trent Water	T/54/45615/R	T/54/45615/R
769	Severn Trent Water	T/54/45839/R	T/54/45839/R
770	Severn Trent Water	T/57/45802/R	T/57/45802/R
771	Severn Trent Water	T/61/45171/R	T/61/45171/R
772	Severn Trent Water	T/65/45569/R	T/65/45569/R
773	Severn Trent Water	T/65/45931/R	T/65/45931/R
774	Severn Trent Water	T/65/45944/R	T/65/45944/R
775	Severn Trent Water	T/66/45337/R	T/66/45337/R
776	Severn Trent Water	T/67/45313/R	T/67/45313/R
777	Severn Trent Water	T/67/45832/R	T/67/45832/R
778	Severn Trent Water	T/69/45349/R	T/69/45349/R
779	Severn Trent Water	T/69/45943/R	T/69/45943/R
780	Severn Trent Water	T/73/45542/R	T/73/45542/R
781	Severn Trent Water	T/74/45346/R	T/74/45346/R
782	Severn Trent Water	T/80/45348/R	T/80/45348/R
783	Severn Trent Water	T/80/45645/R	T/80/45645/R
784	Severn Trent Water	T/80/45928/R	T/80/45928/R
785	Severn Trent Water	T/54/45992/R	T/54/45992/R
786	Severn Trent Water	T/65/45650/R	T/65/45650/R
787	Southern Water	W00385	W00385
788	Southern Water	A00857	A00857
789	Southern Water	W00325	W00325
790	Southern Water	W00336	W00336
791	Southern Water	W00564	W00564
792	Southern Water	A01201	A01201
793	Southern Water	W00147	W00147
794	Southern Water	K02057	K02057
795	Southern Water	A01480	A01480
796	Southern Water	A01164	A01164
797	Southern Water	A00005	A00005
798	Southern Water	A01223	A01223
799	Southern Water	W00539	W00539
800	Southern Water	W00589	W00589
801	Southern Water	W00104	W00104
802	Southern Water	A00755	A00755
803	Southern Water	W00026	W00026
804	Southern Water	A01175	A01175
805	Southern Water	A01230	A01230
806	Southern Water	NPSWQD003871	NPSWQD003871
807	Southern Water	A01200	A01200
808	Southern Water	W00579	W00579
809	Southern Water	A01102	A01102
810	Southern Water	W00033	W00033
811	Southern Water	W00203	W00203
812	South West Water	DRA 459	DRA 459
813	South West Water	SWWA 880	SWWA 880
814	South West Water	SWWA 488	SWWA 488
815	South West Water	NRA-SW-3794	NRA-SW-3794
816	South West Water	NRA-SW-6988	NRA-SW-6988
817	South West Water	203020	203020
818	South West Water	15/49/281/P/16	15/49/281/P/16
819	South West Water	NRA-SW-7825	NRA-SW-7825
820	South West Water	SWWA 1137	SWWA 1137
821	South West Water	EPRCP3528XH	EPRCP3528XH
822	South West Water	SWWA 569	SWWA 569
823	South West Water	DRA 1130	DRA 1130
824	South West Water	302487	302487
825	South West Water	202711	202711
826	South West Water	DRA 1196	DRA 1196
827	South West Water	SWWA 730	SWWA 730
828	South West Water	NRA-SW-5666	NRA-SW-5666
829	South West Water	SWWA 2106	SWWA 2106
830	South West Water	203562	203562
831	South West Water	NRA-SW-0227	NRA-SW-0227
832	South West Water	SWWA 2251	SWWA 2251
833	South West Water	202367	202367
834	South West Water	303086	303086
835	South West Water	15/47/52/P/11	15/47/52/P/11
836	South West Water	NRA-SW-3676	NRA-SW-3676
837	South West Water	DRA 1349	DRA 1349
838	South West Water	NRA-SW-3402	NRA-SW-3402
839	South West Water	NRA-SW-6684	NRA-SW-6684
840	South West Water	NRA-SW-6625	NRA-SW-6625
841	South West Water	NRA-SW-6621	NRA-SW-6621
842	South West Water	NRA-SW-3765	NRA-SW-3765
843	South West Water	SWWA 1148	SWWA 1148
844	South West Water	NRA-SW-6622	NRA-SW-6622
845	South West Water	DRA 262	DRA 262
846	South West Water	NRA-SW-3849	NRA-SW-3849
847	South West Water	SWWA 496	SWWA 496
848	South West Water	NRA-SW-6171	NRA-SW-6171
849	South West Water	DRA 1062	DRA 1062
850	South West Water	303083	303083
851	South West Water	303084	303084
852	South West Water	NRA-SW-0414	NRA-SW-0414
853	South West Water	302142	302142
854	South West Water	NRA-SW-6743	NRA-SW-6743
855	South West Water	203410	203410
856	South West Water	SWWA 2064	SWWA 2064
857	South West Water	NRA-SW-6737	NRA-SW-6737
858	South West Water	NRA-SW-6990	NRA-SW-6990
859	South West Water	203080	203080
860	South West Water	203806	203806
861	South West Water	202222	202222
862	South West Water	SWWA 1003	SWWA 1003
863	South West Water	300436/FN/01	300436/FN/01
864	United Utilities	017670046	017670046
865	United Utilities	016910001	016910001
866	United Utilities	017580272	017580272
867	United Utilities	017470024	017470024
868	United Utilities	017670054	017670054
869	United Utilities	017570022	017570022
870	United Utilities	016950031	016950031
871	United Utilities	017670002	017670002
872	United Utilities	017570066	017570066
873	United Utilities	017470152	017470152
874	United Utilities	017570026	017570026
875	United Utilities	017570013	017570013
876	United Utilities	016892175	016892175
877	United Utilities	016810057	016810057
878	United Utilities	017570067	017570067
879	United Utilities	016810027	016810027
880	United Utilities	017670208	017670208
881	United Utilities	017670194	017670194
882	United Utilities	017670049	017670049
883	United Utilities	EPRFP3828GS	EPRFP3828GS
884	United Utilities	017670005	017670005
885	United Utilities	017270015	017270015
886	United Utilities	017570036	017570036
887	United Utilities	017670010	017670010
888	United Utilities	016940144	016940144
889	United Utilities	017670058	017670058
890	United Utilities	017260053	017260053
891	United Utilities	017670091	017670091
892	United Utilities	017680299	017680299
893	United Utilities	017680367	017680367
894	United Utilities	017370128	017370128
895	United Utilities	017370027	017370027
896	United Utilities	017680364	017680364
897	United Utilities	017670061	017670061
898	United Utilities	017570043	017570043
899	United Utilities	017670101	017670101
900	United Utilities	017670062	017670062
901	United Utilities	017270017	017270017
902	United Utilities	016950037	016950037
903	United Utilities	017470188	017470188
904	United Utilities	017570071	017570071
905	United Utilities	017670011	017670011
906	United Utilities	017470029	017470029
907	United Utilities	017680290	017680290
908	United Utilities	017160041	017160041
909	United Utilities	017570046	017570046
910	United Utilities	017670104	017670104
911	United Utilities	017670068	017670068
912	United Utilities	017670019	017670019
913	United Utilities	017680532	017680532
914	United Utilities	017370030	017370030
915	United Utilities	017570196	017570196
916	United Utilities	016810103	016810103
917	United Utilities	017670110	017670110
918	United Utilities	017670085	017670085
919	United Utilities	017570073	017570073
920	United Utilities	017670024	017670024
921	United Utilities	017570053	017570053
922	United Utilities	017680300	017680300
923	United Utilities	017670025	017670025
924	United Utilities	017570006	017570006
925	United Utilities	017670116	017670116
926	United Utilities	017160046	017160046
927	United Utilities	017670087	017670087
928	United Utilities	017470020	017470020
929	United Utilities	017370061	017370061
930	United Utilities	016810035	016810035
931	United Utilities	017270018	017270018
932	United Utilities	017670042	017670042
933	United Utilities	017570018	017570018
934	United Utilities	017570075	017570075
935	United Utilities	017370039	017370039
936	United Utilities	017370179	017370179
937	United Utilities	017480351	017480351
938	United Utilities	017580285	017580285
939	United Utilities	017270020	017270020
940	United Utilities	017680463	017680463
941	United Utilities	016810119	016810119
942	Wessex Water	102443	102443
943	Wessex Water	102815	102815
944	Wessex Water	102219	102219
945	Wessex Water	102816	102816
946	Wessex Water	402489	402489
947	Wessex Water	101620	101620
948	Wessex Water	100385	100385
949	Wessex Water	400607	400607
950	Wessex Water	102153	102153
951	Wessex Water	400622	400622
952	Wessex Water	101966	101966
953	Yorkshire Water	1569	1569
954	Yorkshire Water	1605	1605
955	Yorkshire Water	1655	1655
956	Yorkshire Water	1659	1659
957	Yorkshire Water	1685	1685
958	Yorkshire Water	1694	1694
959	Yorkshire Water	2137	2137
960	Yorkshire Water	2216	2216
961	Yorkshire Water	2346	2346
962	Yorkshire Water	2363	2363
963	Yorkshire Water	2455	2455
964	Yorkshire Water	2556	2556
965	Yorkshire Water	2562	2562
966	Yorkshire Water	27/19/0075	27/19/0075
967	Yorkshire Water	27/20/0134	27/20/0134
968	Yorkshire Water	27/21/0114	27/21/0114
969	Yorkshire Water	27/21/0142	27/21/0142
970	Yorkshire Water	27/21/0166	27/21/0166
971	Yorkshire Water	27/22/0062	27/22/0062
972	Yorkshire Water	27/22/0075	27/22/0075
973	Yorkshire Water	27/22/0090	27/22/0090
974	Yorkshire Water	27/22/0121	27/22/0121
975	Yorkshire Water	27/22/0135	27/22/0135
976	Yorkshire Water	27/22/0153	27/22/0153
977	Yorkshire Water	27/23/0106	27/23/0106
978	Yorkshire Water	27/23/0108	27/23/0108
979	Yorkshire Water	27/23/0208	27/23/0208
980	Yorkshire Water	27/23/0215	27/23/0215
981	Yorkshire Water	27/23/0216	27/23/0216
982	Yorkshire Water	27/23/0249	27/23/0249
983	Yorkshire Water	27/23/0254	27/23/0254
984	Yorkshire Water	27/23/0256	27/23/0256
985	Yorkshire Water	27/23/0263	27/23/0263
986	Yorkshire Water	27/23/0265	27/23/0265
987	Yorkshire Water	27/23/0272	27/23/0272
988	Yorkshire Water	27/23/0273	27/23/0273
989	Yorkshire Water	27/23/0275	27/23/0275
990	Yorkshire Water	27/23/0276	27/23/0276
991	Yorkshire Water	27/23/0280	27/23/0280
992	Yorkshire Water	27/23/0302	27/23/0302
993	Yorkshire Water	27/23/0305	27/23/0305
994	Yorkshire Water	27/24/0311	27/24/0311
995	Yorkshire Water	27/24/0330	27/24/0330
996	Yorkshire Water	27/24/0337	27/24/0337
997	Yorkshire Water	27/24/0362	27/24/0362
998	Yorkshire Water	27/24/0368	27/24/0368
999	Yorkshire Water	27/24/0369	27/24/0369
1000	Yorkshire Water	27/25/0083	27/25/0083
1001	Yorkshire Water	27/25/0097	27/25/0097
1002	Yorkshire Water	27/25/0111	27/25/0111
1003	Yorkshire Water	27/25/0125	27/25/0125
1004	Yorkshire Water	27/25/0126	27/25/0126
1005	Yorkshire Water	27/25/0132	27/25/0132
1006	Yorkshire Water	27/26/0036	27/26/0036
1007	Yorkshire Water	27/27/0092	27/27/0092
1008	Yorkshire Water	27/27/0140	27/27/0140
1009	Yorkshire Water	27/28/0100	27/28/0100
1010	Yorkshire Water	27/28/0123	27/28/0123
1011	Yorkshire Water	27/28/0165	27/28/0165
1012	Yorkshire Water	27/28/0171	27/28/0171
1013	Yorkshire Water	27/28/0172	27/28/0172
1014	Yorkshire Water	27/28/0180	27/28/0180
1015	Yorkshire Water	27/28/0183	27/28/0183
1016	Yorkshire Water	27/28/0194	27/28/0194
1017	Yorkshire Water	27/29/0065	27/29/0065
1018	Yorkshire Water	27/29/0105	27/29/0105
1019	Yorkshire Water	27/29/0108	27/29/0108
1020	Yorkshire Water	27/29/0109	27/29/0109
1021	Yorkshire Water	27/29/0110	27/29/0110
1022	Yorkshire Water	2776	2776
1023	Yorkshire Water	2855	2855
1024	Yorkshire Water	3143(SS)	3143(SS)
1025	Yorkshire Water	3717(SS)	3717(SS)
1026	Yorkshire Water	664	664
1027	Yorkshire Water	92	92
1028	Yorkshire Water	C4234	C4234
1029	Yorkshire Water	E18	E18
1030	Yorkshire Water	E619(SS)	E619(SS)
1031	Yorkshire Water	E756(SS)	E756(SS)
1032	Yorkshire Water	NPSWQD009944	NPSWQD009944
1033	Yorkshire Water	QR.27/21/0066	QR.27/21/0066
1034	Yorkshire Water	QR.27/22/0039	QR.27/22/0039
1035	Yorkshire Water	QR27/24/0086	QR27/24/0086
1036	Yorkshire Water	WA6192	WA6192
1037	Yorkshire Water	WA6395	WA6395
1038	Yorkshire Water	WA6514	WA6514
1039	Yorkshire Water	WRA6820	WRA6820
1040	Yorkshire Water	WRA6885	WRA6885
1041	Yorkshire Water	WRA7365	WRA7365
1042	Yorkshire Water	WRA7509	WRA7509
1043	Yorkshire Water	WRA7619	WRA7619
1044	Yorkshire Water	WRA7723	WRA7723
1045	Yorkshire Water	WRA7811	WRA7811
1046	Yorkshire Water	WRA7898	WRA7898
1047	Yorkshire Water	WRA8060	WRA8060
1048	Yorkshire Water	WRA8144	WRA8144
1049	Yorkshire Water	WRA8238	WRA8238
1050	Yorkshire Water	WRA8281	WRA8281
1051	Yorkshire Water	WRA8282	WRA8282
1052	Yorkshire Water	WRA8337	WRA8337
1053	Yorkshire Water	WRA8338	WRA8338
1054	Yorkshire Water	WRA8394	WRA8394
1055	Yorkshire Water	WRA8395	WRA8395
1056	Yorkshire Water	WRA8794	WRA8794
1057	Yorkshire Water	WRA8796	WRA8796
1058	Yorkshire Water	WRA8797	WRA8797
1059	Yorkshire Water	WRA8838	WRA8838
1060	Yorkshire Water	WRA8858	WRA8858
1061	Yorkshire Water	WRA8862	WRA8862
1062	Yorkshire Water	WRA8921	WRA8921
1063	South West Water	DRA 1539	DRA 1539
1064	Southern Water	A01107	A01107
1065	Southern Water	A01106	A01106
1066	Southern Water	A01105	A01105
1067	United Utilities	016993400	016993400
1068	Anglian Water	AEECS12401	AEECS12401
1069	Anglian Water	AWNNF1269	AWNNF1269
1070	Anglian Water	AECNF1089	AECNF1089
1071	Anglian Water	ASENF1286	ASENF1286
1072	Anglian Water	ASETS12050	ASETS12050
1073	Anglian Water	AW1NF2464	AW1NF2464
1074	Anglian Water	AW1NF2476	AW1NF2476
1075	Anglian Water	AW5NF5211	AW5NF5211
1076	Anglian Water	AW5NF5178	AW5NF5178
1077	Anglian Water	AW1NF2418	AW1NF2418
1078	Anglian Water	ASCNF1184	ASCNF1184
1079	Northumbrian Water	221/1034	221/1034
1080	Northumbrian Water	231/1086	231/1086
1081	Northumbrian Water	235/1891	235/1891
1082	Northumbrian Water	231/1077	231/1077
1083	Northumbrian Water	226/1187	226/1187
1084	Northumbrian Water	235/1871	235/1871
1085	Northumbrian Water	25/03/1234	25/03/1234
1086	Northumbrian Water	25/02/1078	25/02/1078
1087	Northumbrian Water	25/04/1858	25/04/1858
1088	Northumbrian Water	232/1098	232/1098
1089	Northumbrian Water	235/1695	235/1695
1090	Northumbrian Water	25/06/1015	25/06/1015
1091	Northumbrian Water	225/1036	225/1036
1092	Northumbrian Water	25/01/0912	25/01/0912
1093	Northumbrian Water	233/1178	233/1178
1094	Northumbrian Water	241/1106	241/1106
1095	Northumbrian Water	25/03/1232	25/03/1232
1096	Northumbrian Water	243/0985	243/0985
1097	Severn Trent Water	S/12/25307/R	S/12/25307/R
1098	Severn Trent Water	T/19/36495/R	T/19/36495/R
1099	Severn Trent Water	T/29/35581/R	T/29/35581/R
1100	Severn Trent Water	T/53/46354/R	T/53/46354/R
1101	Severn Trent Water	S/02/56070/R	S/02/56070/R
1102	Severn Trent Water	S/06/55363/R	S/06/55363/R
1103	Severn Trent Water	S/08/26522/R	S/08/26522/R
1104	Severn Trent Water	S/13/26721/R	S/13/26721/R
1105	Severn Trent Water	T/07/36033/R	T/07/36033/R
1106	Severn Trent Water	T/17/35749/R	T/17/35749/R
1107	Severn Trent Water	T/20/36246/R	T/20/36246/R
1108	Severn Trent Water	T/21/35970/R	T/21/35970/R
1109	Severn Trent Water	T/30/35538/R	T/30/35538/R
1110	Severn Trent Water	T/34/35885/R	T/34/35885/R
1111	Severn Trent Water	T/39/45680/R	T/39/45680/R
1112	Severn Trent Water	T/41/45541/R	T/41/45541/R
1113	Severn Trent Water	T/41/45611/R	T/41/45611/R
1114	Severn Trent Water	T/41/45771/R	T/41/45771/R
1115	Severn Trent Water	T/41/45831/R	T/41/45831/R
1116	Severn Trent Water	T/45/45471/R	T/45/45471/R
1117	Severn Trent Water	T/50/45319/R	T/50/45319/R
1118	Severn Trent Water	T/57/45608/R	T/57/45608/R
1119	Severn Trent Water	T/61/45098/R	T/61/45098/R
1120	Severn Trent Water	T/64/45766/R	T/64/45766/R
1121	Severn Trent Water	T/70/45715/R	T/70/45715/R
1122	Severn Trent Water	T/71/45751/R	T/71/45751/R
1123	Severn Trent Water	T/76/45411/R	T/76/45411/R
1124	Severn Trent Water	T/83/45790/R	T/83/45790/R
1125	Severn Trent Water	T/83/45838/R	T/83/45838/R
1126	Severn Trent Water	T/84/45914/R	T/84/45914/R
1127	Severn Trent Water	T/19/35541/R	T/19/35541/R
1128	Severn Trent Water	S/02/56373/R	S/02/56373/R
1129	Severn Trent Water	S/06/55232/R	S/06/55232/R
1130	Severn Trent Water	T/05/36081/R	T/05/36081/R
1131	Severn Trent Water	T/73/45819/R	T/73/45819/R
1132	Severn Trent Water	T/73/46317/R	T/73/46317/R
1133	Severn Trent Water	EPRWB3835AM	EPRWB3835AM
1134	Severn Trent Water	S/04/55141/R	S/04/55141/R
1135	Severn Trent Water	S/20/26440/R	S/20/26440/R
1136	Severn Trent Water	T/11/35953/R	T/11/35953/R
1137	Severn Trent Water	T/23/35544/R	T/23/35544/R
1138	Severn Trent Water	T/36/45583/R	T/36/45583/R
1139	Severn Trent Water	T/41/46401/R	T/41/46401/R
1140	Severn Trent Water	T/61/45995/R	T/61/45995/R
1141	Severn Trent Water	T/71/45942/R	T/71/45942/R
1142	Severn Trent Water	T/75/45222/R	T/75/45222/R
1143	Severn Trent Water	T/81/45466/R	T/81/45466/R
1144	Severn Trent Water	T/83/45915/R	T/83/45915/R
1145	Southern Water	A01510	A01510
1146	Southern Water	W00311	W00311
1147	Southern Water	W00356	W00356
1148	Southern Water	W00497	W00497
1149	Southern Water	A01166	A01166
1150	Southern Water	A00192	A00192
1151	Southern Water	W00237	W00237
1152	Southern Water	A00665	A00665
1153	Southern Water	A00016	A00016
1154	Southern Water	A00720	A00720
1155	Southern Water	W00358	W00358
1156	Southern Water	A00193	A00193
1157	Southern Water	W00479	W00479
1158	Southern Water	W00008	W00008
1159	Southern Water	A00197	A00197
1160	Southern Water	A00198	A00198
1161	Southern Water	A00199	A00199
1162	Southern Water	A00036	A00036
1163	Southern Water	A00200	A00200
1164	Southern Water	W00504	W00504
1165	Southern Water	A00856	A00856
1166	South West Water	NRA-SW-3983	NRA-SW-3983
1167	South West Water	NRA-SW-4946	NRA-SW-4946
1168	South West Water	303000	303000
1169	South West Water	203388	203388
1170	South West Water	NRA-SW-6984	NRA-SW-6984
1171	South West Water	202475	202475
1172	South West Water	NRA-SW-4934	NRA-SW-4934
1173	South West Water	NRA-SW-6975	NRA-SW-6975
1174	South West Water	203027	203027
1175	South West Water	203109	203109
1176	South West Water	301142	301142
1177	South West Water	NRA-SW-3706	NRA-SW-3706
1178	South West Water	SWWA 944	SWWA 944
1179	South West Water	NRA-SW-3701	NRA-SW-3701
1180	South West Water	SWWA 2413	SWWA 2413
1181	South West Water	NRA-SW-5475	NRA-SW-5475
1182	South West Water	NRA-SW-5295	NRA-SW-5295
1183	South West Water	301299	301299
1184	South West Water	202463	202463
1185	South West Water	SWWA 2475	SWWA 2475
1186	South West Water	NRA-SW-3869	NRA-SW-3869
1187	South West Water	203406	203406
1188	South West Water	NRA-SW-6982	NRA-SW-6982
1189	South West Water	NRA-SW-0215	NRA-SW-0215
1190	South West Water	NRA-SW-4999	NRA-SW-4999
1191	South West Water	NRA-SW-3912	NRA-SW-3912
1192	South West Water	302505	302505
1193	South West Water	NRA-SW-0005	NRA-SW-0005
1194	South West Water	301935	301935
1195	South West Water	NRA-SW-5654	NRA-SW-5654
1196	South West Water	303683	303683
1197	South West Water	NRA-SW-3885	NRA-SW-3885
1198	South West Water	NRA-SW-6981	NRA-SW-6981
1199	South West Water	302908	302908
1200	South West Water	203249	203249
1201	South West Water	203792	203792
1202	South West Water	203113	203113
1203	South West Water	NRA-SW-0237	NRA-SW-0237
1204	South West Water	SWWA 42	SWWA 42
1205	United Utilities	017470136	017470136
1206	United Utilities	016810045	016810045
1207	United Utilities	017470166	017470166
1208	United Utilities	016810052	016810052
1209	United Utilities	016993398	016993398
1210	United Utilities	017670004	017670004
1211	United Utilities	017160034	017160034
1212	United Utilities	017160036	017160036
1213	United Utilities	016810187	016810187
1214	United Utilities	017260004	017260004
1215	United Utilities	017050012	017050012
1216	United Utilities	016930121	016930121
1217	United Utilities	017370100	017370100
1218	United Utilities	017670126	017670126
1219	United Utilities	017270006	017270006
1220	United Utilities	016810085	016810085
1221	United Utilities	016920134	016920134
1222	United Utilities	016993397	016993397
1223	United Utilities	017770003	017770003
1224	United Utilities	017030002	017030002
1225	United Utilities	017270008	017270008
1226	United Utilities	016940150	016940150
1227	United Utilities	017020107	017020107
1228	United Utilities	016940151	016940151
1229	United Utilities	016940182	016940182
1230	United Utilities	016810110	016810110
1231	United Utilities	016983122	016983122
1232	United Utilities	016810113	016810113
1233	United Utilities	017260056	017260056
1234	United Utilities	016950136	016950136
1235	United Utilities	016910014	016910014
1236	United Utilities	016810116	016810116
1237	United Utilities	016930122	016930122
1238	Wessex Water	102735	102735
1239	Wessex Water	102190	102190
1240	Wessex Water	103731	103731
1241	Wessex Water	101442	101442
1242	Wessex Water	401625	401625
1243	Wessex Water	102218	102218
1244	Wessex Water	101637	101637
1245	Wessex Water	102152	102152
1246	Wessex Water	102222	102222
1247	Wessex Water	101441	101441
1248	Wessex Water	100288	100288
1249	Wessex Water	102289	102289
1250	Wessex Water	102630	102630
1251	Wessex Water	401758	401758
1252	Wessex Water	102818	102818
1253	Wessex Water	102328	102328
1254	Wessex Water	NPSWQD000307	NPSWQD000307
1255	Wessex Water	102050	102050
1256	Yorkshire Water	1866	1866
1257	Yorkshire Water	2138	2138
1258	Yorkshire Water	2207	2207
1259	Yorkshire Water	2246	2246
1260	Yorkshire Water	2344	2344
1261	Yorkshire Water	2502	2502
1262	Yorkshire Water	27/19/0045	27/19/0045
1263	Yorkshire Water	27/19/0078	27/19/0078
1264	Yorkshire Water	27/20/0046	27/20/0046
1265	Yorkshire Water	27/20/0069	27/20/0069
1266	Yorkshire Water	27/21/0091	27/21/0091
1267	Yorkshire Water	27/21/0139	27/21/0139
1268	Yorkshire Water	27/21/0205	27/21/0205
1269	Yorkshire Water	27/22/0052	27/22/0052
1270	Yorkshire Water	27/22/0060	27/22/0060
1271	Yorkshire Water	27/22/0077	27/22/0077
1272	Yorkshire Water	27/23/0123	27/23/0123
1273	Yorkshire Water	27/23/0281	27/23/0281
1274	Yorkshire Water	27/24/0171	27/24/0171
1275	Yorkshire Water	27/24/0228	27/24/0228
1276	Yorkshire Water	27/24/0363	27/24/0363
1277	Yorkshire Water	27/25/0075	27/25/0075
1278	Yorkshire Water	27/27/0065	27/27/0065
1279	Yorkshire Water	27/29/0106	27/29/0106
1280	Yorkshire Water	2838	2838
1281	Yorkshire Water	2846	2846
1282	Yorkshire Water	3331	3331
1283	Yorkshire Water	3334(SS)	3334(SS)
1284	Yorkshire Water	3761(SS)	3761(SS)
1285	Yorkshire Water	381	381
1286	Yorkshire Water	65	65
1287	Yorkshire Water	C4106	C4106
1288	Yorkshire Water	C4107	C4107
1289	Yorkshire Water	E15	E15
1290	Yorkshire Water	E25	E25
1291	Yorkshire Water	E743(SS)	E743(SS)
1292	Yorkshire Water	QR.27/21/0047	QR.27/21/0047
1293	Yorkshire Water	T/83/45405/R	T/83/45405/R
1294	Yorkshire Water	WA 6273	WA 6273
1295	Yorkshire Water	WRA6658	WRA6658
1296	Yorkshire Water	WRA6756	WRA6756
1297	Yorkshire Water	WRA6889	WRA6889
1298	Yorkshire Water	WRA6924	WRA6924
1299	Yorkshire Water	WRA6925	WRA6925
1300	Yorkshire Water	WRA7172	WRA7172
1301	Yorkshire Water	WRA7220	WRA7220
1302	Yorkshire Water	WRA7409	WRA7409
1303	Yorkshire Water	WRA7507	WRA7507
1304	Yorkshire Water	WRA7510	WRA7510
1305	Yorkshire Water	WRA7637	WRA7637
1306	South West Water	203312	203312
1307	Northumbrian Water	254/1965	254/1965
1308	Severn Trent Water	S/20/26262/R	S/20/26262/R
1309	Southern Water	W00354	W00354
1310	United Utilities	016993399	016993399
1311	United Utilities	016940139	016940139
1312	South West Water	203380	203380
1313	South West Water	CRA 1	CRA 1
1314	United Utilities	016810066	016810066
1315	Southern Water	W00379	W00379
1316	South West Water	NRA-SW-6742	NRA-SW-6742
1317	United Utilities	017680455	017680455
1318	Southern Water	A00190	A01239
1319	Severn Trent Water	S/07/56187/R	S/07/55368/T
1320	Northumbrian Water	210/1312	210/0039
1321	Northumbrian Water	210/A/0849	221/0968
1322	Northumbrian Water	244/0985	244/E/0315
1323	Yorkshire Water	27/23/0271	COPA/1207
1324	Northumbrian Water	244/0087	244/C/0282
1325	Anglian Water	AWNNF13347	AW5NF42
1326	Northumbrian Water	255/1144	245/1213
1327	South West Water	200364/SF/01	200364
1328	South West Water	DRA 456	NRA-SW-1058
1329	South West Water	200357/FN/01	NRA-SW-1075
1330	South West Water	DRA 1512	DRA 1513
1331	South West Water	SWWA 728	NRA-SW-1069
1332	South West Water	NRA-SW-3560	NRA-SW-3561
1333	South West Water	NRA-SW-3570	NRA-SW-3571
1334	South West Water	200365/FN/01	200365/SF/01
1335	South West Water	NRA-SW-3495	NRA-SW-3496
1336	South West Water	200356/FN/01	200356
1337	South West Water	DRA 1351	202194/CS/01
1338	South West Water	15/47/41/P/6	302128
1339	South West Water	033125/FN/01	033125/SF/01
1340	South West Water	SWWA 523	NRA-SW-1362
1341	South West Water	201033	202205
1342	South West Water	303399	2895/71
1343	South West Water	003126/FN/01	003126/SF/01
1344	Northumbrian Water	231/A/1033	231/A/0454
1345	United Utilities	016930114	016987034
1346	United Utilities	016940087	016940085
1347	Severn Trent Water	S/15/26435/R	S/15/26435/B-3
1348	Severn Trent Water	S/09/55923/R	S/09/55923
1349	South West Water	002027	2027
1350	Anglian Water	AW1NF1065	AW1NF1016
1351	Anglian Water	AW1NF420	AW1NF482
1352	Northumbrian Water	221/A/0845	221/G/0336
1353	Northumbrian Water	255/1145	255/1158
1354	Northumbrian Water	235/1695	235/1804
1355	Northumbrian Water	231/A/1033	231/A/0453
1356	Northumbrian Water	210/A/0849	210/1292
1357	Northumbrian Water	244/1028	244/A/0494
1358	Northumbrian Water	25/02/1120	25/02/1104
1359	Severn Trent Water	S/08/26590/R	S/17/25586/O
1360	Severn Trent Water	S/19/25637/R	S/19/21927/R
1361	Severn Trent Water	S/02/55516/R	NPSWQD007895
1362	Severn Trent Water	S/09/56076/R	S/09/55836/O
1363	Severn Trent Water	S/10/26528/R	S/10/26066/R
1364	Severn Trent Water	T/19/36017/R	T/19/01498/O
1365	Severn Trent Water	T/34/36002/R	T/34/21308/O
1366	Severn Trent Water	S/08/55849/R	S/08/55842/O
1367	Southern Water	A00755	A01188
1368	Southern Water	A00755	A00014
1369	Southern Water	A00751	A00752
1370	Southern Water	A00751	A00753
1371	Southern Water	A00751	A00754
1372	South West Water	302738	NRA-SW-1004
1373	South West Water	NRA-SW-3790	NRA-SW-3792
1374	South West Water	200261/FN/01	202186/CS/01
1375	South West Water	NRA-SW-5002	NRA-SW-5004
1376	South West Water	001685/FU/01	001685/PC/01
1377	South West Water	201054	DRA 1149
1378	South West Water	NRA-SW-3743	NRA-SW-3746
1379	South West Water	301944	302135
1380	Yorkshire Water	1569	27/24/0403
1381	Yorkshire Water	27/20/0054	C5254
1382	Yorkshire Water	E61	NPSWQD011063
1383	Yorkshire Water	C4954	WRA8750
1384	South West Water	CRA 156	NRA-SW-1518
1385	Northumbrian Water	254/1965	25/04/1657
1386	South West Water	NRA-SW-0222	NRA-SW-1188
1387	South West Water	302642	302999
1388	South West Water	202413	202650
1389	South West Water	031299/FN/01	031299/SS/01
1390	Anglian Water	CASM.0340	CASM.0072
1391	Yorkshire Water	27/19/0082	27/19/0082
1392	Anglian Water	AW3TS519	AW3TS519
1393	South West Water	201127	201127
1394	United Utilities	016950038	016950043
1395	Southern Water	CSSC.0411	D00076
1396	Southern Water	CATM.2969	CASM.0006
1397	Anglian Water	AW1NF1451	AW1NF1451
1398	Anglian Water	AW5NF5214	AW5NF5214
1399	Anglian Water	AW5NF361	AW5NF361
1400	Anglian Water	ASENF1317	ASENF1317
1401	Southern Water	CATM.2969	CATM.2969
1402	Anglian Water	ASCNF1184	EPRRB3894EG
1403	Northumbrian Water	245/1245	EPRQB3897RB
1404	Northumbrian Water	245/1383	245/1264
1405	Northumbrian Water	EPRHB3394ND	245/1372
1406	Severn Trent Water	T/21/36278/R	T/21/01674/O
1407	Severn Trent Water	T/41/45831/R	T/41/07297/O
1408	Severn Trent Water	S/06/55363/R	S/06/55188/O
1409	Southern Water	A00805	A01153
1410	Southern Water	W00520	K01506
1411	Southern Water	A01107	A00958
1412	Thames Water	CSSA.0360	EPRBP3220XF
1413	United Utilities	016910001	016892364
1414	United Utilities	016993399	016931348
1415	United Utilities	017670049	017680309
1416	United Utilities	017570035	017580316
1417	United Utilities	016920130	016993696
1418	Wessex Water	102712	013266
1419	Wessex Water	042453	042430
1420	Wessex Water	400608	041306
1421	Wessex Water	102630	013132
1422	Wessex Water	400435	051320
1423	Wessex Water	400435	400785
1424	Wessex Water	040093	040122
1425	Wessex Water	101332	013463
1426	Severn Trent Water	T/83/45559/R	T/83/21614/O
1427	Severn Trent Water	T/42/46187/R	T/42/03392/O
1428	South West Water	SWWA 2424	301844
1429	United Utilities	017670069	017680333
1430	United Utilities	016940149	016982887
1431	United Utilities	016940172	016993525
1432	United Utilities	016920350	016982504
1433	Yorkshire Water	E10	3841
1434	Southern Water	A00720	EPR/HB3495RM
1435	Wessex Water	102630	013128
1436	Wessex Water	102107	021440
1437	Wessex Water	102107	012935
1438	Wessex Water	102107	013224
1439	Wessex Water	102107	013056
1440	Wessex Water	102107	013054
1441	Wessex Water	102107	011093
1442	Wessex Water	102107	013103
1443	Wessex Water	102107	013105
1444	Wessex Water	102107	013102
1445	Wessex Water	102107	013106
1446	Wessex Water	102107	013108
1447	Wessex Water	102222	021332
1448	Wessex Water	401382	043198
1449	Wessex Water	401382	043196
1450	Wessex Water	100288	013157
1451	Wessex Water	100288	013156
1452	Wessex Water	070063	082087
1453	Wessex Water	102272	013091
1454	Wessex Water	102630	013130
1455	Wessex Water	010099	013268
1456	Wessex Water	102272	021680
1457	Wessex Water	070099	070885
1458	Wessex Water	070099	070887
1459	Wessex Water	070099	070886
1460	Wessex Water	100935	070950
1461	Wessex Water	101456	072347
1462	Wessex Water	102107	011793
1463	Wessex Water	401065	041221
1464	Wessex Water	102107	013101
1465	Wessex Water	400622	043152
1466	Wessex Water	102107	013053
1467	Wessex Water	401065	042745
1468	Wessex Water	102107	011395
1469	Wessex Water	071670	071726
1470	Anglian Water	AW1NF2849	EPRRB3194RX
1471	Anglian Water	AWCNF10296	EPRRB3295WE
1472	United Utilities	016983122	016993627
1473	United Utilities	016810042	EPRQB3499WS
1474	United Utilities	017160028	017190815
1475	United Utilities	017160008	017190786
1476	United Utilities	016920130	EPRQB3594RZ
1477	United Utilities	016983122	016993626
1478	United Utilities	017030014	EPRSB3399WS
1479	United Utilities	016810099	EPRSB3398WP
1480	United Utilities	016940148	EPRSB3398EX
1481	United Utilities	016940148	EPRSB3398RR
1482	Yorkshire Water	WRA7409	S/UD/112
1483	Yorkshire Water	WRA7409	WRA9311
1484	Severn Trent Water	T/41/45991/R	EPRLB3591EZ
1485	Severn Trent Water	S/13/25796/R	EPRLB3797NN
1486	Severn Trent Water	S/02/56373/R	S/02/55703/O
1487	Severn Trent Water	S/06/56074/R	S/06/55077/O
1488	Severn Trent Water	T/01/36052/R	T/01/35942/O
1489	Severn Trent Water	T/20/35618/R	T/20/03553/O
1490	Severn Trent Water	T/48/45678/R	T/36/01407/O
1491	Severn Trent Water	T/42/46187/R	T/42/01142/O
1492	Severn Trent Water	S/20/26643/R	S/20/26052/O
1493	Severn Trent Water	T/66/45609/R	T/66/07371/O
1494	Anglian Water	CASM.0340	CASM.0086
1495	Anglian Water	CASM.0340	CASM.0087
1496	Anglian Water	CASM.0340	AW2NFE18768
1497	Northumbrian Water	235/1695	233/1023
1498	Northumbrian Water	235/1695	235/1894
1499	Northumbrian Water	225/1036	225/F/0525
1500	Severn Trent Water	T/01/35916/R	DT/2543
1501	Severn Trent Water	T/55/45835/R	EPRHB3897NC
1502	Severn Trent Water	S/02/56373/R	S/02/04594/O
1503	Severn Trent Water	S/02/56373/R	S/02/21018/O
1504	Severn Trent Water	S/02/56373/R	S/02/21029/O
1505	Severn Trent Water	S/02/56373/R	S/02/21030/O
1506	Severn Trent Water	S/02/56373/R	S/02/21034/O
1507	Severn Trent Water	S/02/56373/R	S/02/21485/O
1508	Severn Trent Water	S/06/55232/R	S/06/21724/O
1509	Severn Trent Water	S/06/55232/R	S/06/21847/O
1510	Severn Trent Water	S/06/55232/R	S/06/56331/O
1511	Severn Trent Water	S/20/26440/R	S/20/12172/O
1512	Severn Trent Water	T/01/36052/R	T/01/12372/O
1513	Severn Trent Water	T/01/36052/R	T/01/30152/O
1514	Severn Trent Water	T/08/36171/R	T/08/36010/O
1515	Severn Trent Water	T/11/35994/R	T/11/02414/O
1516	Severn Trent Water	T/12/36068/R	T/13/30009/O
1517	Severn Trent Water	T/24/36133/R	T/34/03432/O
1518	Severn Trent Water	T/48/45678/R	T/46/21202/O
1519	Severn Trent Water	T/48/45678/R	T/48/21196/O
1520	Severn Trent Water	T/48/45678/R	T/48/21201/O
1521	Severn Trent Water	T/48/45678/R	T/48/22374/O
1522	Severn Trent Water	NPSWQD008782	T/64/45734/O
1523	Severn Trent Water	T/81/45709/R	T/81/08788/O
1524	Severn Trent Water	T/61/45626/R	T/61/40302/O
1525	Southern Water	W00369	W00446
1526	Southern Water	A00720	A00939
1527	Southern Water	A00720	D00080
1528	Southern Water	W00518	A01345
1529	Southern Water	A00720	A01157
1530	Southern Water	A00720	A00927
1531	Southern Water	A00720	A00967
1532	Southern Water	A01106	A01257
1533	Southern Water	A00814	A00459
1534	Southern Water	A00720	A00928
1535	Southern Water	A00720	K02115
1536	Southern Water	W00131	A01050
1537	Southern Water	A00720	A01460
1538	Southern Water	A00720	A00969
1539	Southern Water	A00751	A01017
1540	Southern Water	A00720	A01458
1541	Southern Water	W00511	A01339
1542	Southern Water	W00506	A00895
1543	Southern Water	A00720	A01464
1544	Southern Water	A00720	A00141
1545	Southern Water	A00751	A01016
1546	Southern Water	A00720	A00467
1547	Southern Water	A00857	A00747
1548	Southern Water	A01213	A00781
1549	Southern Water	NPSWQD005970	A01422
1550	Southern Water	A01107	A00963
1551	Southern Water	W00131	H01049
1552	Southern Water	A01107	A00964
1553	United Utilities	016950042	017180606
1554	United Utilities	017030014	017081269
1555	United Utilities	016810042	016892427
1556	United Utilities	016983122	016920452
1557	United Utilities	017160025	01BBN0128
1558	United Utilities	016950042	016993909
1559	United Utilities	017160025	017180472
1560	United Utilities	016950033	01BRY0027
1561	United Utilities	017160025	017180468
1562	United Utilities	016810066	016892195
1563	United Utilities	017160025	017180469
1564	United Utilities	017060016	01LA1964
1565	United Utilities	016950033	01BRY0038
1566	United Utilities	016920130	016982533
1567	United Utilities	016950033	016993787
1568	United Utilities	016920130	01STH0051
1569	United Utilities	017050012	017091496
1570	United Utilities	016950033	016993905
1571	United Utilities	016920130	016982535
1572	United Utilities	016950033	016982936
1573	United Utilities	016810066	01STH0049
1574	United Utilities	016810066	017091498
1575	United Utilities	017160008	017160125
1576	United Utilities	017160025	017180470
1577	United Utilities	016950033	016983242
1578	United Utilities	017670049	017680296
1579	United Utilities	017160008	017160074
1580	United Utilities	016810066	016892194
1581	United Utilities	016950033	016993479
1582	United Utilities	016910010	016881767
1583	United Utilities	016920130	016993695
1584	United Utilities	016983122	016940472
1585	Wessex Water	102153	EPRJB3891VH
1586	Wessex Water	102107	100576/CS/01
1587	Wessex Water	102107	100575/CS/01
1588	Wessex Water	102107	101281
1589	Wessex Water	102107	101234
1590	Wessex Water	102107	101248
1591	Wessex Water	102107	101823
1592	Wessex Water	101543	100505/CS/01
1593	Wessex Water	102107	103311
1594	Wessex Water	102107	102880
1595	Wessex Water	102107	101730
1596	Wessex Water	102107	101727
1597	Wessex Water	102107	101880
1598	Wessex Water	102107	NPSWQD010488
1599	Wessex Water	102107	100473
1600	Wessex Water	102107	100477
1601	Wessex Water	102107	100476
1602	Wessex Water	102107	100474
1603	Wessex Water	102107	100472
1604	Wessex Water	102107	101746
1605	Wessex Water	401739	402123
1606	Wessex Water	101637	100081
1607	Wessex Water	100673	103862
1608	Wessex Water	040059	401451
1609	Wessex Water	071901	101666
1610	Wessex Water	401050	400688
1611	Wessex Water	070099	EPRJB3795WW
1612	Wessex Water	101331	103570
1613	Wessex Water	400622	401188
1614	Wessex Water	102107	NPSWQD010514
1615	Wessex Water	102107	NPSWQD010513
1616	Wessex Water	102107	NPSWQD010511
1617	Wessex Water	102107	NPSWQD010512
1618	Wessex Water	101431	102491
1619	Yorkshire Water	27/24/0124	27/24/0437
1620	Yorkshire Water	WRA7409	3681
1621	Yorkshire Water	WRA6925	WRA8217
1622	Severn Trent Water	T/41/45991/R	T/41/03162/O
1623	Severn Trent Water	T/48/45678/R	T/48/00758/O
1624	Severn Trent Water	T/61/45626/R	T/61/01787/O
1625	Severn Trent Water	T/81/45709/R	T/81/07993/O
1626	Wessex Water	101331	070149
1627	Wessex Water	102272	010941
1628	Wessex Water	102272	010940
1629	Wessex Water	102272	010911
1630	Wessex Water	102272	010922
1631	Wessex Water	102272	010920
1632	Wessex Water	102272	010914
1633	Wessex Water	102272	010862
1634	Wessex Water	102272	010853
1635	Wessex Water	102272	010850
1636	Wessex Water	102272	021513
1637	Wessex Water	102272	010883
1638	Wessex Water	102272	010936
1639	Wessex Water	102272	010935
1640	Wessex Water	102988	013134
1641	Wessex Water	102361	012852
1642	Wessex Water	102361	012854
1643	Wessex Water	102361	012851
1644	Wessex Water	102361	012853
1645	Wessex Water	401336	051049
1646	Wessex Water	102257	070910
1647	Wessex Water	102272	021480
1648	Wessex Water	102272	021669
1649	Wessex Water	102630	021353
1650	Wessex Water	102630	013129
1651	Wessex Water	102630	021351
1652	Wessex Water	102630	021352
1653	Wessex Water	102988	010772
1654	Wessex Water	400622	041274
1655	Wessex Water	NRA-SW-3495	070230
1656	Wessex Water	102257	070906
1657	Wessex Water	010037	010822
1658	Wessex Water	400673	041198
1659	Wessex Water	102272	012179
1660	Wessex Water	102272	012181
1661	Wessex Water	102272	012182
1662	Wessex Water	102272	012180
1663	Wessex Water	102272	010898
1664	Wessex Water	102272	010885
1665	Wessex Water	102272	010954
1666	Wessex Water	010099	013267
1667	Wessex Water	401065	051310
1668	Wessex Water	102272	021452
1669	Anglian Water	AW5NF739A	EPRRB3094WT
1670	Anglian Water	AW5NF5286	EPRPB3893RV
1671	Northumbrian Water	245/1245	245/1388
1672	Severn Trent Water	E25	671
1673	Severn Trent Water	T/21/35970/R	EPRLB3493VK
1674	Severn Trent Water	T/39/46184/R	EPRQB3393VF
1675	Severn Trent Water	T/39/46184/R	EPRQB3394AV
1676	Severn Trent Water	T/39/46184/R	EPRQB3394NU
1677	Severn Trent Water	T/39/46184/R	EPRQB3394RT
1678	Severn Trent Water	T/39/46184/R	EPRQB3394VZ
1679	Severn Trent Water	E25	EPRSB3693ES
1680	Severn Trent Water	T/70/46165/R	T/71/07945/O
1681	United Utilities	016950033	EPRQB3594EP
1682	United Utilities	016983319	EPRSB3396NF
1683	United Utilities	016983319	EPRQB3591WC
1684	United Utilities	016910009	EPRSB3793EM
1685	United Utilities	016983319	EPRQB3592VZ
1686	United Utilities	016983319	EPRQB3592AV
1687	United Utilities	016920134	017091489
1688	United Utilities	016940151	EPRQB3595AJ
1689	United Utilities	016940151	EPRQB3594WA
1690	United Utilities	016940143	016993623
1691	United Utilities	016940087	016993552
1692	United Utilities	016920134	016993521
1693	United Utilities	017260046	017290494
1694	United Utilities	016950041	EPRQB3593DY
1695	United Utilities	016940150	EPRSB3397WJ
1696	United Utilities	016940143	NPSWQD010710
1697	United Utilities	016950041	EPRSB3396RE
1698	United Utilities	016940174	EPRQB3596AP
1699	United Utilities	017580285	017580412
1700	United Utilities	016940150	EPRQB3590DE
1701	United Utilities	016920134	01WIG0107
1702	United Utilities	016920134	EPRQB3595RE
1703	United Utilities	016940150	016993610
1704	United Utilities	016940150	EPRSB3396WD
1705	United Utilities	017160008	EPRSB3395WA
1706	United Utilities	016950034	016993577
1707	United Utilities	016810099	EPRSB3399DG
1708	United Utilities	017160049	EPRSB3396AJ
1709	United Utilities	016910006	016892279
1710	United Utilities	016983319	EPRSB3396VR
1711	United Utilities	016940151	016993555
1712	United Utilities	017160006	017190824
1713	United Utilities	016940150	EPRTB3192VK
1714	United Utilities	016940003	EPRSB3398VQ
1715	United Utilities	016983122	EPRSB3399EK
1716	United Utilities	017160065	EPRSB3398AS
1717	United Utilities	017050012	EPRQB3499VB
1718	United Utilities	016910009	EPRSB3793RW
1719	United Utilities	017670075	017670159
1720	United Utilities	017190565	EPRSB3396ES
1721	United Utilities	016983319	EPRQB3591EA
1722	United Utilities	017670087	017680275
1723	United Utilities	016950034	EPRQB3594AD
1724	United Utilities	016940143	01MAN0155
1725	United Utilities	016910009	EPRSB3793VY
1726	United Utilities	016983319	EPRQB3593RF
1727	United Utilities	017160049	NPSWQD010693
1728	Wessex Water	102272	EPRJB3798AB
1729	Yorkshire Water	WRA7510	EPRSB3590RG
1730	Yorkshire Water	WRA7510	EPRSB3590WC
1731	United Utilities	016920135	016993565
1732	Severn Trent Water	T/53/46354/R	NPSWQD006539
1733	Severn Trent Water	T/03/35658/R	T/03/02366/O
1734	Severn Trent Water	T/03/20783/R	T/03/12149/O
1735	Severn Trent Water	T/03/35861/R	T/03/35469/O
1736	Severn Trent Water	T/12/36068/R	T/12/03550/O
1737	Severn Trent Water	T/21/35970/R	T/21/22068/O
1738	Severn Trent Water	T/23/35619/R	T/23/01208/O
1739	Severn Trent Water	T/36/45730/R	T/36/45168/O
1740	Severn Trent Water	T/53/46354/R	T/56/02657/O
1741	Severn Trent Water	T/61/45626/R	T/61/02467/O
1742	Severn Trent Water	T/62/45769/R	T/62/46121/O
1743	Severn Trent Water	T/21/35970/R	TSC3884
1744	Severn Trent Water	T/53/46354/R	T/55/45338/O
1745	Southern Water	W00008	A01096
1746	Thames Water	CSSA.0360	CEHR.0019
1747	Thames Water	CNTD.0085	CANM.0664
1748	Thames Water	CSSA.0360	CSBC.0084
1749	United Utilities	017260053	017260074
1750	United Utilities	016920134	016983355
1751	Wessex Water	040067	EPRAP3827XC
1752	Wessex Water	040067	EPRAP3822XS
1753	Yorkshire Water	2829(T)	NPSWQD008129
1754	Severn Trent Water	T/12/36068/R	T/11/02240/O
1755	Severn Trent Water	T/50/45829/R	T/52/03045/O
1756	Severn Trent Water	T/55/45835/R	T/55/02608/O
1757	Severn Trent Water	T/53/46354/R	T/56/02858/O
1758	Severn Trent Water	T/20/35543/R	T/20/02399/O
1759	Anglian Water	ASECS12405	EPRLB3996VP
1760	Anglian Water	AWNNF13399	AWNNF13849
1761	Northumbrian Water	255/1220	EPRBB3793WU
1762	Northumbrian Water	235/1695	235/1549
1763	Northumbrian Water	255/1144	255/1200
1764	Northumbrian Water	235/1695	235/1759
1765	Northumbrian Water	235/1695	EPRCB3797VZ
1766	Severn Trent Water	T/12/36068/R	TSC578
1767	Severn Trent Water	T/10/36212/R	DT/9807
1768	Severn Trent Water	T/55/45835/R	EPRDB3191NX
1769	Severn Trent Water	T/39/46184/R	EPRKB3591WX
1770	Severn Trent Water	T/50/45829/R	EPRKB3592NQ
1771	Severn Trent Water	T/39/46184/R	EPRKB3593DE
1772	Severn Trent Water	T/39/46184/R	EPRKB3593EV
1773	Severn Trent Water	T/39/46184/R	EPRKB3593RU
1774	Severn Trent Water	T/22/36211/R	EPRKB3594VF
1775	Severn Trent Water	T/39/46184/R	EPRLB3496WE
1776	Severn Trent Water	T/39/46184/R	EPRLB3497EQ
1777	Severn Trent Water	T/39/46184/R	EPRLB3497RC
1778	Severn Trent Water	S/02/56373/R	S/02/08777/O
1779	Severn Trent Water	S/08/26590/R	S/08/05700/O
1780	Severn Trent Water	S/09/55809/R	S/09/05082/O
1781	Severn Trent Water	S/11/26637/R	S/11/04516/O
1782	Severn Trent Water	T/01/36052/R	T/01/35644/O
1783	Severn Trent Water	T/07/36033/R	T/07/01441/O
1784	Severn Trent Water	T/10/36212/R	T/09/08852/O
1785	Severn Trent Water	T/10/36212/R	T/09/21432/O
1786	Severn Trent Water	T/10/36212/R	T/09/36464/O
1787	Severn Trent Water	T/12/36068/R	T/11/36251/O
1788	Severn Trent Water	T/12/36068/R	T/12/30280/O
1789	Severn Trent Water	T/22/36211/R	T/18/00454/O
1790	Severn Trent Water	T/24/36133/R	T/24/30268/O
1791	Severn Trent Water	T/24/36133/R	T/24/35228/O
1792	Severn Trent Water	T/41/45824/R	T/41/21120/O
1793	Severn Trent Water	T/41/45580/R	T/41/40220/O
1794	Severn Trent Water	T/48/45678/R	T/45/40345/O
1795	Severn Trent Water	T/48/45678/R	T/48/45135/O
1796	Severn Trent Water	T/50/45829/R	T/50/21104/O
1797	Severn Trent Water	T/53/46354/R	T/52/00460/O
1798	Severn Trent Water	T/53/46354/R	T/52/03092/O
1799	Severn Trent Water	T/53/46354/R	T/52/40318/O
1800	Severn Trent Water	T/53/46354/R	T/56/01285/O
1801	Severn Trent Water	T/53/46354/R	T/56/03521/O
1802	Severn Trent Water	T/53/46354/R	T/56/07427/O
1803	Severn Trent Water	T/57/45484/R	T/57/02032/O
1804	Severn Trent Water	T/61/45098/R	T/61/03673/O
1805	Severn Trent Water	T/61/45626/R	T/61/12297/O
1806	Severn Trent Water	T/61/45798/R	T/61/12377/O
1807	Severn Trent Water	T/61/45098/R	T/61/21522/O
1808	Severn Trent Water	T/64/45170/R	T/64/45268/O
1809	Severn Trent Water	T/71/45571/R	T/71/02650/O
1810	Southern Water	A00726	A00769
1811	Southern Water	A00726	A00760
1812	Southern Water	W00530	A01055
1813	Southern Water	W00494	A01331
1814	Southern Water	A00751	A01386
1815	Southern Water	A00787	A00732
1816	Southern Water	A00154	H01115
1817	Southern Water	CSSC.0411	D00074
1818	Southern Water	W00384	A00510
1819	Southern Water	W00219	A01296
1820	Southern Water	W00311	A01355
1821	Southern Water	A00805	A00903
1822	Southern Water	A01164	D01056
1823	Southern Water	A00016	A00371
1824	Southern Water	A00726	A00385
1825	Southern Water	W00037	K02099
1826	Southern Water	W00532	NPSWQD008569
1827	Southern Water	A00036	A01348
1828	Southern Water	A00576	W00421
1829	Southern Water	CSSC.0411	CASM.0008
1830	Southern Water	A01106	S01989
1831	Southern Water	W00494	A01435
1832	Southern Water	A00726	A00758
1833	Southern Water	A00726	A00029
1834	Southern Water	A00805	A00911
1835	Southern Water	A00726	A01138
1836	Southern Water	A00726	A00761
1837	Southern Water	A01213	A00780
1838	Southern Water	W00041	A01033
1839	Southern Water	A01164	D01053
1840	Southern Water	W00311	A01293
1841	Southern Water	W00219	A01446
1842	Southern Water	W00589	A01000
1843	Southern Water	A00805	D01033
1844	Southern Water	A00016	H01796
1845	Southern Water	A00016	H01794
1846	South West Water	NRA-SW-6959	302157
1847	South West Water	303347	301775
1848	Thames Water	CSSA.0360	EPRAB3890AS
1849	Thames Water	CSSA.0360	EPRAB3890EX
1850	Thames Water	CSSA.0360	EPRAB3799WV
1851	Thames Water	CSSA.0360	EPRAB3890DU
1852	United Utilities	016810099	016892222
1853	United Utilities	017470166	017480449
1854	United Utilities	017160008	NPSWQD010749
1855	United Utilities	017160024	EPRKB3991VZ
1856	United Utilities	016940151	016993490
1857	United Utilities	017160008	NPSWQD010684
1858	United Utilities	016940139	016982745
1859	United Utilities	016940143	016993550
1860	United Utilities	016993400	016881734
1861	United Utilities	016940143	016940411
1862	United Utilities	017160006	017180623
1863	United Utilities	016940087	016983267
1864	United Utilities	016940143	016982719
1865	United Utilities	016920126	017091500
1866	United Utilities	016950038	016982851
1867	United Utilities	016810084	01VRY0054
1868	United Utilities	017160049	NPSWQD010680
1869	United Utilities	016940087	016993736
1870	United Utilities	016920134	016982776
1871	United Utilities	016920135	016993530
1872	United Utilities	016940150	016993654
1873	United Utilities	016910001	016982621
1874	United Utilities	016920126	017091492
1875	United Utilities	017570019	017580254
1876	United Utilities	016920134	016982786
1877	United Utilities	016940150	016993659
1878	United Utilities	016950032	016993558
1879	United Utilities	016940143	01TAM0069
1880	United Utilities	017160008	NPSWQD010104
1881	United Utilities	016920134	017081358
1882	United Utilities	016940151	016892181
1883	United Utilities	016940151	01STK0089
1884	United Utilities	016940143	016982734
1885	United Utilities	016950032	016982193
1886	United Utilities	017160065	017081265
1887	United Utilities	017160005	01BUR0012
1888	United Utilities	017160006	017180488
1889	United Utilities	016940143	NPSWQD010711
1890	United Utilities	016940154	01TRA0038
1891	United Utilities	016950041	01ROC0082
1892	United Utilities	017060016	01CHR0006
1893	United Utilities	016940143	NPSWQD010702
1894	United Utilities	016920350	016983354
1895	United Utilities	016810068	016982733
1896	United Utilities	016930121	016993826
1897	United Utilities	016940151	016982657
1898	United Utilities	016940151	016982656
1899	United Utilities	016940172	016982640
1900	United Utilities	016940143	016982992
1901	United Utilities	016983319	016993527
1902	United Utilities	017160008	01BUR0021
1903	United Utilities	016940143	NPSWQD010957
1904	United Utilities	016950033	016993605
1905	United Utilities	017270003	017280425
1906	United Utilities	017160049	017180475
1907	United Utilities	016810116	01VRY0106
1908	United Utilities	016940150	016982746
1909	United Utilities	016993399	016881738
1910	United Utilities	016993397	016891627
1911	United Utilities	017470166	017480303
1912	United Utilities	016993399	016892357
1913	United Utilities	017160024	EPRLP3329XW
1914	United Utilities	017160008	01BBN0038
1915	United Utilities	016950034	016982642
1916	United Utilities	016940087	01TAM0102
1917	United Utilities	016810091	01NEW0008
1918	United Utilities	017160064	017190852
1919	United Utilities	017670013	017680271
1920	United Utilities	016940151	016982653
1921	United Utilities	016940151	NPSWQD010908
1922	United Utilities	016940151	NPSWQD010103
1923	United Utilities	016950032	016941213
1924	United Utilities	016950038	016983311
1925	United Utilities	016810030	016881595
1926	United Utilities	016950032	016983223
1927	United Utilities	016983319	NPSWQD010102
1928	United Utilities	017160065	017081364
1929	United Utilities	016940143	016982957
1930	United Utilities	016940143	016993693
1931	United Utilities	016940172	01PEA0034
1932	United Utilities	016950032	016982191
1933	United Utilities	017160025	017180721
1934	United Utilities	016940143	016982765
1935	United Utilities	016950032	016983270
1936	United Utilities	017160049	01BBN0049
1937	United Utilities	016950034	016993576
1938	United Utilities	016920134	017081356
1939	United Utilities	016940144	016993438
1940	United Utilities	016983319	016993538
1941	Wessex Water	102272	NPSWQD010266
1942	Wessex Water	102107	100892
1943	Wessex Water	102107	100895
1944	Wessex Water	102257	102262
1945	Wessex Water	102272	100510/CS/01
1946	Wessex Water	010299	103315
1947	Wessex Water	102272	100501/CS/01
1948	Wessex Water	400673	402081
1949	Wessex Water	071228	401558
1950	Wessex Water	102049	103195
1951	Wessex Water	102272	NPSWQD010268
1952	Wessex Water	102272	NPSWQD010267
1953	Wessex Water	401758	401299
1954	Yorkshire Water	WRA7510	3654
1955	Yorkshire Water	C4954	3742
1956	Yorkshire Water	WRA6924	C4578
1957	Yorkshire Water	QR.27/21/0048	EPRUP3224GY
1958	Yorkshire Water	WRA7510	WRA8659
1959	Yorkshire Water	WRA6924	WRA9145
1960	Severn Trent Water	T/58/45986/R	EPRHB3690AU
1961	Severn Trent Water	S/04/55141/R	S/04/12251/O
1962	Severn Trent Water	S/06/55384/R	S/06/07934/O
1963	Severn Trent Water	T/01/36052/R	T/01/03101/O
1964	Severn Trent Water	T/50/46146/R	T/50/03632/O
1965	Severn Trent Water	T/61/45995/R	T/61/03116/O
1966	Severn Trent Water	T/61/45171/R	T/61/03264/O
1967	Severn Trent Water	T/51/46399/R	T/83/01666/O
1968	Southern Water	A01106	A01442B
1969	United Utilities	017160008	017190595
1970	Severn Trent Water	T/64/45170/R	T/64/46347/O
1971	United Utilities	016940150	016982741
1972	United Utilities	016950038	016982237
1973	Yorkshire Water	1866	97
1974	Severn Trent Water	T/54/46202/R	T/54/07710/O
1975	Anglian Water	AWNNF13399	AWNNF10520
1976	Northumbrian Water	255/0736	255/5016
1977	Southern Water	A00623	A00430
1978	Southern Water	A01112	A00718
1979	Anglian Water	AW4NF625	AW4NF929X
1980	Anglian Water	ANNNF13086	ANNNF10232
1981	Northumbrian Water	25/03/1234	253/1100
1982	Anglian Water	AECTS11334	AECTS10313
1983	Anglian Water	AEENF10525	AEENF2470
1984	Anglian Water	AW1NF964A	AW1NF1380
1985	Anglian Water	AW4NF556X	ASENF10090
1986	Anglian Water	AW1NF1162	AWCNF11839
1987	Anglian Water	AW3TS514	ANNTS13731
1988	Anglian Water	AW3TS514	ANNNF13733
1989	Anglian Water	AW3TS514	ANNNF1758
1990	Anglian Water	AWCNF10455	AW1NF1017
1991	Anglian Water	AW2TSE03684	ASENF12166
1992	Anglian Water	AW2TSE03684	ASENF12167
1993	Anglian Water	AW2TSE03684	ASENF12163
1994	Anglian Water	AW2TSE03684	ASENF12162
1995	Anglian Water	AW2TSE03684	ASENF12165
1996	Anglian Water	ANNNF13474	ANNNF13537
1997	Anglian Water	AW1NF2849	AWCNF1604
1998	Anglian Water	ASENF242	ASENF15588
1999	Anglian Water	ASENF242	AW4NF1774
[truncated: 10,008 more rows]
