# Supplementary material for: Combined sewer overflows: relating event duration monitoring data to wastewater systems' capacity in England
Source: Royal Society of Chemistry journal article supplement (doi:10.1039/d2ew00637e), 2023-01-01
Supplement: d2ew00637e2.csv [file d2ew00637e2.csv]

	PERMIT_NUMBER_UWWTWs	COMPANY_NAME	DWF (m3/d)	FFT (m3/d)	FFT/DWF	System Duration 2021
1	AEENF12058	ANGLIAN WATER	291	751.68	2.58309278350515	2.01
2	ANNNF13374	ANGLIAN WATER	4609	NA	NA	0.25
3	AWCNF11073	ANGLIAN WATER	267	617.76	2.31370786516854	0
4	ANNNF13380	ANGLIAN WATER	304	794.88	2.61473684210526	65.24
5	ASCNF10117	ANGLIAN WATER	145	388.8	2.68137931034483	43.75
6	AW1NF1362	ANGLIAN WATER	1600	4536	2.835	0
7	AEENF1256	ANGLIAN WATER	119	267.84	2.25075630252101	0.54
8	AW4CS12011	ANGLIAN WATER	1196	NA	NA	15.75
9	AW3NF131	ANGLIAN WATER	1150	2073.6	1.80313043478261	55.51
10	ASENF1006	ANGLIAN WATER	180	466.56	2.592	38
11	AW1NF2723	ANGLIAN WATER	500	1805.76	3.61152	1.25
12	AECNF1004	ANGLIAN WATER	2500	6255.36	2.502144	0.25
13	ASCNF10277	ANGLIAN WATER	540	1123.2	2.08	1073.75
14	ASCNF2051	ANGLIAN WATER	500	1296	2.592	147
15	AW1NF1250	ANGLIAN WATER	200	1296	6.48	10.75
16	AEENF10525	ANGLIAN WATER	158	NA	NA	906.75
17	AW4NF550	ANGLIAN WATER	1440	4320	3	94.71
18	ASCNF10281	ANGLIAN WATER	363	1339.2	3.68925619834711	694.5
19	AW4NF556X	ANGLIAN WATER	2000	7283.52	3.64176	403.09
20	AW4TF351	ANGLIAN WATER	2273	5935.68	2.61138583369996	1749.25
21	ANNTS13006	ANGLIAN WATER	2500	6497.28	2.598912	1420.43
22	ANNNF10345	ANGLIAN WATER	470	1209.6	2.5736170212766	532.54
23	AW1NF2460	ANGLIAN WATER	35000	110419.2	3.15483428571429	477
24	AW5NF5217	ANGLIAN WATER	70	371.52	5.30742857142857	377
25	ASENF2052	ANGLIAN WATER	1500	3983.04	2.65536	48
26	AW2NFE05358	ANGLIAN WATER	1417	3680.64	2.59748764996471	0
27	AW1NF1162	ANGLIAN WATER	4100	16761.6	4.08819512195122	12.5
28	AW1NF2802	ANGLIAN WATER	105	311.04	2.96228571428571	17.89
29	AW3TS514	ANGLIAN WATER	10000	NA	NA	15.63
30	AW5NF421	ANGLIAN WATER	355	NA	NA	0
31	AWCNF10455	ANGLIAN WATER	6320	12847.68	2.03286075949367	225
32	AWCNF1025	ANGLIAN WATER	1500	3222.72	2.14848	210
33	AW1NF302	ANGLIAN WATER	820	2332.8	2.84487804878049	48.5
34	ANNNF1573	ANGLIAN WATER	6210	16329.6	2.6295652173913	273.54
35	AW1NF939	ANGLIAN WATER	2006	7948.8	3.96251246261216	0
36	AW5NF694	ANGLIAN WATER	168	700.704	4.17085714285714	54.25
37	ASENF12212	ANGLIAN WATER	6859	20390.4	2.97279486805657	82.16
38	ANNNF13060	ANGLIAN WATER	129	336.96	2.61209302325581	594.53
39	ASENF1023	ANGLIAN WATER	420	1166.4	2.77714285714286	559.75
40	AW5NF5228	ANGLIAN WATER	128	483.84	3.78	184.12
41	AW5NF757	ANGLIAN WATER	75	172.8	2.304	6.5
42	AW2TSE03684	ANGLIAN WATER	2160	NA	NA	13
43	ANNNF13474	ANGLIAN WATER	1636	4250.88	2.59833740831296	3
44	AW3NFF892	ANGLIAN WATER	1940	8726.4	4.49814432989691	99.5
45	AWNNF13399	ANGLIAN WATER	42856	113875.2	2.65715885756954	4891.5
46	AEENF1265	ANGLIAN WATER	780	2825.28	3.62215384615385	1554.27
47	AW1NF2849	ANGLIAN WATER	3700	10834.56	2.92825945945946	0
48	ASETS10533	ANGLIAN WATER	2200	5719.68	2.59985454545455	398.7
49	AEECS12404	ANGLIAN WATER	34115	49248	1.4435878645757	837.5
50	AW3NFF232	ANGLIAN WATER	800	1995.84	2.4948	2577
51	ASENF242	ANGLIAN WATER	1280	3663.36	2.862	304.75
52	ANNNF2073	ANGLIAN WATER	29400	88905.6	3.024	3
53	AW1NF1065	ANGLIAN WATER	1214	3542.4	2.91795716639209	0
54	AW4NF624X	ANGLIAN WATER	690	1900.8	2.75478260869565	466.25
55	ASCNF1033	ANGLIAN WATER	37330	109987.2	2.94634878114117	30.2
56	AWNNF13072	ANGLIAN WATER	79	544.32	6.89012658227848	402.29
57	AW2TSE9961	ANGLIAN WATER	52050	74563.2	1.43253025936599	347.5
58	AECNF1039	ANGLIAN WATER	3800	5184	1.36421052631579	20.5
59	AWCNF10528	ANGLIAN WATER	72	190.08	2.64	613.75
60	AW1NF876	ANGLIAN WATER	15000	NA	NA	4.5
61	ASCNF1041	ANGLIAN WATER	400	1036.8	2.592	0
62	AEECS12401	ANGLIAN WATER	10546	27388.8	2.59707946140717	734.1
63	AWNNF1269	ANGLIAN WATER	120	293.76	2.448	79
64	AW1NF420	ANGLIAN WATER	51	NA	NA	0.5
65	AW1NF127	ANGLIAN WATER	1800	NA	NA	10.25
66	AW2NF151	ANGLIAN WATER	2235	10800	4.83221476510067	0.25
67	ANNNF1047	ANGLIAN WATER	360	950.4	2.64	0
68	ANNNF1049	ANGLIAN WATER	1400	3127.68	2.23405714285714	1071.75
69	ASETS1046	ANGLIAN WATER	29284	76403.52	2.60905340800437	158.14
70	AW5NF624	ANGLIAN WATER	148	414.72	2.80216216216216	0
71	AW5NF5179	ANGLIAN WATER	10760	43632	4.05501858736059	1.25
72	AECNF4	ANGLIAN WATER	NA	NA	NA	164.75
73	AW5NF178	ANGLIAN WATER	152	535.68	3.52421052631579	0.5
74	AW5NF299	ANGLIAN WATER	1422	3499.2	2.46075949367089	835.25
75	AWCNF10296	ANGLIAN WATER	78000	233280	2.99076923076923	641.5
76	AEECS12415	ANGLIAN WATER	6934	15318.72	2.20921834438996	638.77
77	AW5NF5222	ANGLIAN WATER	120	224.64	1.872	0
78	AW1NF700	ANGLIAN WATER	680	2496.96	3.672	256.86
79	ASENF1054	ANGLIAN WATER	340	2332.8	6.86117647058824	56.31
80	ANNNF13012	ANGLIAN WATER	5370	8640	1.60893854748603	1323.5
81	AEENF527	ANGLIAN WATER	3769	9849.6	2.61331918280711	38
82	AEENF2055	ANGLIAN WATER	410	1062.72	2.592	240.25
83	ASENF1055	ANGLIAN WATER	610	1563.84	2.56367213114754	1247.5
84	AW4NF625	ANGLIAN WATER	4032	12096	3	663.5
85	AECNF1059	ANGLIAN WATER	2500	NA	NA	169.62
86	AW5NF5221	ANGLIAN WATER	150	164.16	1.0944	352
87	AECNF10273	ANGLIAN WATER	205	561.6	2.73951219512195	123.5
88	AW5NF812	ANGLIAN WATER	410	829.44	2.0230243902439	315
89	ANNNF10274	ANGLIAN WATER	1509	3922.56	2.59944333996024	455.5
90	AW2NFE11569	ANGLIAN WATER	934	2851.2	3.05267665952891	1.75
91	AWNNF13400	ANGLIAN WATER	118	311.04	2.63593220338983	2733.57
92	AECNF1062	ANGLIAN WATER	470	1296	2.75744680851064	88.5
93	ASENF1274	ANGLIAN WATER	560	1589.76	2.83885714285714	55.14
94	AW5NF5216	ANGLIAN WATER	119	242.784	2.04020168067227	1457.88
95	AW4NF300X	ANGLIAN WATER	152	1036.8	6.82105263157895	187.26
96	AWCNF11352	ANGLIAN WATER	1604	4181.76	2.60708229426434	17.75
97	AW1NF1176	ANGLIAN WATER	4350	9244.8	2.12524137931035	142.13
98	ASCNF1065	ANGLIAN WATER	1209	2903.04	2.40119106699752	697.75
99	ANNNF1575	ANGLIAN WATER	60	NA	NA	466.25
100	AWNNF13141	ANGLIAN WATER	155	397.44	2.56412903225806	64
101	AWNNF13345	ANGLIAN WATER	96	164.16	1.71	625.75
102	AEENF15448	ANGLIAN WATER	3300	8812.8	2.67054545454545	1641.75
103	AWCNF2056	ANGLIAN WATER	135	354.24	2.624	122
104	AW4NF64X	ANGLIAN WATER	2270	5901.12	2.59961233480176	158
105	AW2NF911	ANGLIAN WATER	1630	6419.52	3.93835582822086	548.25
106	AW1NF213	ANGLIAN WATER	470	1221.696	2.59935319148936	3022.5
107	ANNNF1069	ANGLIAN WATER	2050	4665.6	2.27590243902439	2.75
108	AWCNF2057	ANGLIAN WATER	8300	21625.92	2.60553253012048	13
109	AW1NF545	ANGLIAN WATER	14584	40106.88	2.75006034009874	0
110	AW1NF964A	ANGLIAN WATER	1211	3162.24	2.61126341866226	20.25
111	ASENF1278	ANGLIAN WATER	1000	3024	3.024	70
112	ANNNF10441	ANGLIAN WATER	1600	3888	2.43	45.25
113	ANNNF13086	ANGLIAN WATER	231	518.4	2.24415584415584	35.25
114	AEENF12055	ANGLIAN WATER	299	768.96	2.57177257525084	2.33
115	ASENF12211	ANGLIAN WATER	96	250.56	2.61	358.92
116	ANNNF13059	ANGLIAN WATER	95	250.56	2.63747368421053	691.25
117	AW5NF171	ANGLIAN WATER	132	534.816	4.05163636363636	0
118	ANNNF1077	ANGLIAN WATER	120	311.04	2.592	92.75
119	ASENF10358	ANGLIAN WATER	365	838.08	2.2961095890411	0
120	ASENF12255	ANGLIAN WATER	1900	4924.8	2.592	214.47
121	AWNNF13052	ANGLIAN WATER	70000	159840	2.28342857142857	363.25
122	ASENF1076	ANGLIAN WATER	290	864	2.97931034482759	132.75
123	AW5NF768	ANGLIAN WATER	269	674.784	2.5084907063197	2616.25
124	AW5NF5214	ANGLIAN WATER	115	319.68	2.77982608695652	1719.9
125	AWCNF11340	ANGLIAN WATER	1284	3041.28	2.36859813084112	3
126	ASENF10268	ANGLIAN WATER	720	1676.16	2.328	464.5
127	ASENF1084	ANGLIAN WATER	160	518.4	3.24	8
128	AEENF12038	ANGLIAN WATER	419	1088.64	2.5981861575179	0
129	ASENF1576	ANGLIAN WATER	1100	2825.28	2.56843636363636	0
130	AWNNF13652	ANGLIAN WATER	119	311.04	2.61378151260504	862.24
131	ASENF1284	ANGLIAN WATER	640	2237.76	3.4965	20.5
132	AW1NF1004	ANGLIAN WATER	370	967.68	2.61535135135135	28.11
133	AW5NF124	ANGLIAN WATER	113	336.96	2.98194690265487	199
134	AW3TS519	ANGLIAN WATER	46730	80697.6	1.72689064840574	455.6
135	ASCNF2062	ANGLIAN WATER	190	518.4	2.72842105263158	67.25
136	AECNF11353	ANGLIAN WATER	1295	2246.4	1.73467181467181	3563.25
137	AECNF1089	ANGLIAN WATER	670	1460.16	2.17934328358209	1318
138	ASENF1090	ANGLIAN WATER	1700	4648.32	2.73430588235294	5.08
139	AW2NF524	ANGLIAN WATER	2900	5607.36	1.9335724137931	259.75
140	ASENF1286	ANGLIAN WATER	1700	3542.4	2.08376470588235	159.25
141	AWNNF1287	ANGLIAN WATER	153	381.024	2.49035294117647	822.89
142	ANNNF1093	ANGLIAN WATER	300	777.6	2.592	627.5
143	ASETS12050	ANGLIAN WATER	6782	18230.4	2.68805662046594	457.75
144	AW5NF699	ANGLIAN WATER	NA	NA	NA	15
145	ASCNF10308	ANGLIAN WATER	58	153.792	2.65158620689655	19.5
146	ANNNF1099	ANGLIAN WATER	813	2116.8	2.60369003690037	799.99
147	ASCNF1094	ANGLIAN WATER	2250	5875.2	2.6112	1013
148	AW2NF342	ANGLIAN WATER	5700	34560	6.06315789473684	4.75
149	AWCNF10454	ANGLIAN WATER	295	708.48	2.40162711864407	330.9
150	AW3NFF200	ANGLIAN WATER	860	2579.904	2.99988837209302	10.5
151	ANNNF2068	ANGLIAN WATER	225	587.52	2.6112	163
152	AW2TS184	ANGLIAN WATER	500	864	1.728	86.19
153	ANNNF2067	ANGLIAN WATER	200	587.52	2.9376	1079.75
154	AW4NF118AW	ANGLIAN WATER	1090	2833.92	2.59992660550459	19.25
155	ANNNF10519	ANGLIAN WATER	2315	5063.04	2.18705831533477	1566.5
156	AW1NF2464	ANGLIAN WATER	10290	20995.2	2.04034985422741	17.25
157	ANNNF1105	ANGLIAN WATER	1085	2522.88	2.32523502304147	116.77
158	AW5NF378A	ANGLIAN WATER	1910	3300.48	1.728	487
159	AW5NF254	ANGLIAN WATER	680	777.6	1.14352941176471	14.79
160	AW4NF521	ANGLIAN WATER	494	993.6	2.01133603238866	3180.25
161	ASENF1291	ANGLIAN WATER	250	525.312	2.101248	1794.42
162	AWCNF1106	ANGLIAN WATER	10700	27993.6	2.61622429906542	504.75
163	ANNTS13654	ANGLIAN WATER	3117	7776	2.49470644850818	370.75
164	AEETS12128	ANGLIAN WATER	34213	89856	2.62637009323941	427.5
165	AECNF1108	ANGLIAN WATER	1400	3637.44	2.59817142857143	925
166	ANNCS13577	ANGLIAN WATER	18062	47243.52	2.61563060569151	2
167	AW4NF358X	ANGLIAN WATER	1090	4363.2	4.00293577981651	217
168	AEECS12400	ANGLIAN WATER	5000	11491.2	2.29824	638.5
169	AW5NF557A	ANGLIAN WATER	2400	4800.384	2.00016	695.75
170	ANNNF13405	ANGLIAN WATER	580	2678.4	4.61793103448276	517.25
171	AWCNF1293	ANGLIAN WATER	750	1987.2	2.6496	412.36
172	AW5NF803	ANGLIAN WATER	1700	4440.96	2.61232941176471	5.5
173	ASENF12042	ANGLIAN WATER	370	1105.92	2.98897297297297	361
174	AWNNF13148	ANGLIAN WATER	68	259.2	3.81176470588235	190.25
175	AECTS11334	ANGLIAN WATER	21600	64800	3	397.7
176	AW1NF1012A	ANGLIAN WATER	295	648	2.19661016949153	102.5
177	ANNNF13061	ANGLIAN WATER	367	613.44	1.67149863760218	40.97
178	ASENF1118	ANGLIAN WATER	480	1434.24	2.988	146.22
179	ANNNF1490	ANGLIAN WATER	732	1555.2	2.12459016393443	1116
180	AW2NFE17367	ANGLIAN WATER	736	1944	2.64130434782609	766.5
181	AWCNF10415	ANGLIAN WATER	7600	19872	2.61473684210526	879
182	ASENF1122	ANGLIAN WATER	1400	3628.8	2.592	65.75
183	AWNNF13347	ANGLIAN WATER	253	319.68	1.26355731225296	262.72
184	AWNNF13357	ANGLIAN WATER	800	984.96	1.2312	1418
185	ASCNF1125	ANGLIAN WATER	1800	4665.6	2.592	25
186	AECNF10119	ANGLIAN WATER	431	1157.76	2.6862180974478	281.25
187	AW1NF1389	ANGLIAN WATER	225	691.2	3.072	176
188	AECNF10518	ANGLIAN WATER	2067	5356.8	2.59158200290276	358.5
189	AWCNF1123	ANGLIAN WATER	9900	26179.2	2.64436363636364	17.5
190	AEENF1406	ANGLIAN WATER	1200	3499.2	2.916	666.1
191	ANNNF1131	ANGLIAN WATER	6000	16761.6	2.7936	498.75
192	ANNNF13040	ANGLIAN WATER	639	1658.88	2.59605633802817	132.63
193	ASECS12405	ANGLIAN WATER	25912	NA	NA	145.13
194	ANNNF13149	ANGLIAN WATER	8640	22464	2.6	4.77
195	ASENF1136	ANGLIAN WATER	6800	17703.36	2.60343529411765	1179.73
196	AWNNF13396	ANGLIAN WATER	158	406.08	2.57012658227848	0.25
197	AW3NF89	ANGLIAN WATER	1600	NA	NA	14.75
198	AW1NF1063	ANGLIAN WATER	5148	13651.2	2.65174825174825	699.5
199	ASETS10531	ANGLIAN WATER	1100	2868.48	2.60770909090909	713.5
200	AECNF11429	ANGLIAN WATER	320	820.8	2.565	760
201	AEENF2076	ANGLIAN WATER	720	1874.88	2.604	13.36
202	AECTF11049	ANGLIAN WATER	180	466.56	2.592	196.5
203	AW5NF5226	ANGLIAN WATER	570	1728	3.03157894736842	4.25
204	AW1NF934	ANGLIAN WATER	1800	4700.16	2.6112	215.75
205	ASCNF11025	ANGLIAN WATER	3900	11664	2.99076923076923	1.25
206	AW5NF739A	ANGLIAN WATER	6025	20001.6	3.31976763485477	871.25
207	AWCNF11400	ANGLIAN WATER	106	274.752	2.592	1135.75
208	AEECS12411	ANGLIAN WATER	1777	2851.2	1.60450196961171	100.25
209	AECNF2080	ANGLIAN WATER	300	777.6	2.592	1707.75
210	AW5NF141A	ANGLIAN WATER	197	432	2.19289340101523	0
211	AWCNF1149	ANGLIAN WATER	550	1356.48	2.46632727272727	31.7
212	ANNNF13387	ANGLIAN WATER	1142	2972.16	2.60259194395797	30.25
213	AW5NF400	ANGLIAN WATER	474	989.28	2.08708860759494	638.75
214	AW1NF2476	ANGLIAN WATER	6100	15552	2.54950819672131	15
215	ANNTS13007	ANGLIAN WATER	23867	62035.2	2.59920392173294	121.75
216	ANNNF1298	ANGLIAN WATER	450	1149.12	2.5536	93
217	AW4NF199X	ANGLIAN WATER	262	682.56	2.60519083969466	11.95
218	AW3NFF654	ANGLIAN WATER	290	1581.12	5.45213793103448	4
219	ANNNF1153	ANGLIAN WATER	4540	13616.64	2.99925991189427	217.75
220	ANNNF10292	ANGLIAN WATER	260	673.92	2.592	283.5
221	AEECS12410	ANGLIAN WATER	4386	NA	NA	2.75
222	AW5NF247	ANGLIAN WATER	63	189.216	3.00342857142857	228
223	AW1NF1459	ANGLIAN WATER	155	466.56	3.01006451612903	846
224	AW5NF5211	ANGLIAN WATER	2962	7344	2.47940580688724	384.5
225	AW5NF809	ANGLIAN WATER	1500	3896.64	2.59776	320.97
226	AWCNF1160	ANGLIAN WATER	1015	2505.6	2.46857142857143	639.5
227	ANNNF1161	ANGLIAN WATER	130	302.4	2.32615384615385	54.25
228	AW1NF1081	ANGLIAN WATER	900	1995.84	2.2176	2823.5
229	ANNNF13041	ANGLIAN WATER	475	1235.52	2.60109473684211	10.37
230	AWCNF11348	ANGLIAN WATER	289	777.6	2.69065743944637	1705.56
231	AW1NF1003	ANGLIAN WATER	1607	4125.6	2.56726820161792	0
232	AW1NF2724	ANGLIAN WATER	129	388.8	3.01395348837209	1748.25
233	AWCNF11407	ANGLIAN WATER	346	898.56	2.59699421965318	2327.25
234	ASCNF1162	ANGLIAN WATER	3210	8380.8	2.61084112149533	499.75
235	AW5NF5178	ANGLIAN WATER	66192	120960	1.82741116751269	1492
236	AWNNF13029	ANGLIAN WATER	82	NA	NA	827.4
237	AW1NF2418	ANGLIAN WATER	4700	12268.8	2.6103829787234	221.25
238	AW1NF975	ANGLIAN WATER	1200	NA	NA	2.5
239	AW2NF814	ANGLIAN WATER	115	345.6	3.00521739130435	387.07
240	AEENF1304	ANGLIAN WATER	260	673.92	2.592	21.91
241	AW5NF566	ANGLIAN WATER	130	919.296	7.07150769230769	82.47
242	AW5NF5184	ANGLIAN WATER	4000	9158.4	2.2896	23
243	ASENF1172	ANGLIAN WATER	4600	15534.72	3.37711304347826	248.75
244	AW2TSE12870	ANGLIAN WATER	5827	15206.4	2.60964475716492	138
245	AW5NF139	ANGLIAN WATER	120	276.48	2.304	12.5
246	AW2TS975	ANGLIAN WATER	8630	NA	NA	2.25
247	AWCNF1178	ANGLIAN WATER	320	1262.304	3.9447	0
248	AEENF1305	ANGLIAN WATER	1000	2229.12	2.22912	6.5
249	ANNNF2084	ANGLIAN WATER	1920	7646.4	3.9825	0.25
250	AW1NF2535	ANGLIAN WATER	2600	15500.16	5.9616	1
251	ASCNF1184	ANGLIAN WATER	3700	9504	2.56864864864865	69.75
252	AW5NF5213	ANGLIAN WATER	450	1772.928	3.93984	238
253	ANNNF10347	ANGLIAN WATER	849	2203.2	2.59505300353357	54.12
254	AEENF12044	ANGLIAN WATER	530	1105.92	2.08664150943396	0
255	ASCNF1186	ANGLIAN WATER	2800	7378.56	2.6352	860.75
256	AWCNF1187	ANGLIAN WATER	1500	3888	2.592	358.25
257	AW1NF759	ANGLIAN WATER	2200	9590.4	4.35927272727273	34.25
258	AW5NF761	ANGLIAN WATER	79	146.88	1.85924050632911	526.72
259	ANNNF10527	ANGLIAN WATER	315	829.44	2.63314285714286	625.5
260	ASETS1532	ANGLIAN WATER	662	1728	2.61027190332326	22
261	AWCNF1191	ANGLIAN WATER	827	2151.36	2.60140266021765	3848.25
262	AEENF1310	ANGLIAN WATER	430	NA	NA	66
263	ASENF10532	ANGLIAN WATER	1700	3827.52	2.25148235294118	224
264	AW4NF1064X	ANGLIAN WATER	1600	4155.84	2.5974	3.25
265	ANNNF1192	ANGLIAN WATER	1400	3240	2.31428571428571	462.5
266	AECNF1195	ANGLIAN WATER	2500	6480	2.592	597.25
267	AW3NFF535	ANGLIAN WATER	630	NA	NA	67
268	ANNNF13039	ANGLIAN WATER	156	501.12	3.21230769230769	0
269	ANNNF13036	ANGLIAN WATER	4615	10368	2.2465872156013	114.33
270	AW2NF490	ANGLIAN WATER	900	NA	NA	624.25
271	AW5TS741	ANGLIAN WATER	15720	32832	2.08854961832061	437
272	ASETS10380	ANGLIAN WATER	1800	4682.88	2.6016	1.23
273	AECNF10270	ANGLIAN WATER	215	777.6	3.61674418604651	631.25
274	AW3NF125	ANGLIAN WATER	858	2056.32	2.39664335664336	0
275	AW1NF909	ANGLIAN WATER	9200	19785.6	2.15060869565217	67.23
276	AW2NFE08562	ANGLIAN WATER	1600	4752	2.97	50
277	ASENF1543	ANGLIAN WATER	320	2237.76	6.993	150
278	AW5NF5286	ANGLIAN WATER	6000	NA	NA	596.5
279	ASCNF1208	ANGLIAN WATER	1500	3836.16	2.55744	377.25
280	AWNNF13384	ANGLIAN WATER	261	673.92	2.58206896551724	47
281	AW1NF183	ANGLIAN WATER	130	336.96	2.592	232.82
282	AW5NF315	ANGLIAN WATER	290	751.68	2.592	0
283	ANNNF10536	ANGLIAN WATER	395	1028.16	2.60293670886076	22.57
284	AWCNF11338	ANGLIAN WATER	282	734.4	2.60425531914894	4.5
285	ASENF1210	ANGLIAN WATER	216	466.56	2.16	1898.31
286	AECNF1213	ANGLIAN WATER	500	1641.6	3.2832	0.25
287	ASENF1211	ANGLIAN WATER	4400	12303.36	2.79621818181818	458.75
288	ASENF1314	ANGLIAN WATER	3441	9676.8	2.81220575414124	6.57
289	ANNNF1215	ANGLIAN WATER	260	691.2	2.65846153846154	494.5
290	AW1NF1077	ANGLIAN WATER	1603	3024	1.88646288209607	421.25
291	AWCNF11010	ANGLIAN WATER	170	328.32	1.93129411764706	341.25
292	ANNNF13333	ANGLIAN WATER	145	432	2.97931034482759	14.5
293	AW5TS742	ANGLIAN WATER	3247	15033.6	4.62999692023406	2.58
294	ANNNF13397	ANGLIAN WATER	666	1425.6	2.14054054054054	39.35
295	ASCNF1224	ANGLIAN WATER	1400	3628.8	2.592	8.25
296	AW4NF653X	ANGLIAN WATER	211	547.776	2.59609478672986	559.56
297	AW5NF361	ANGLIAN WATER	390	1442.88	3.69969230769231	42.25
298	AWCNF11022	ANGLIAN WATER	248	527.04	2.12516129032258	20.81
299	AW2NFE02070	ANGLIAN WATER	2400	5184	2.16	330.5
300	AWCNF1584	ANGLIAN WATER	106	233.28	2.20075471698113	36.46
301	AW5NF5212	ANGLIAN WATER	95	250.56	2.63747368421053	35.4
302	ASENF1318	ANGLIAN WATER	80	207.36	2.592	792.93
303	AW1NF63	ANGLIAN WATER	2800	7344	2.62285714285714	409.75
304	AW5NF762	ANGLIAN WATER	52	207.36	3.98769230769231	58.23
305	AW5NF5249	ANGLIAN WATER	115	345.6	3.00521739130435	2.23
306	ASETS1229	ANGLIAN WATER	600	1563.84	2.6064	1006.8
307	AW2NFE04662	ANGLIAN WATER	2400	6220.8	2.592	1498.75
308	ASENF1317	ANGLIAN WATER	210	544.32	2.592	6.75
309	AWCNF2089	ANGLIAN WATER	272	708.48	2.60470588235294	34.46
310	AW1NFA171	ANGLIAN WATER	223	604.8	2.71210762331839	54.5
311	AW5NF743	ANGLIAN WATER	990	NA	NA	828.97
312	ANNNF13085	ANGLIAN WATER	370	959.04	2.592	529
313	ASENF10497	ANGLIAN WATER	6300	15811.2	2.50971428571429	29.88
314	ANNNF10437	ANGLIAN WATER	1200	2401.92	2.0016	114.25
315	AW2TSE35766	ANGLIAN WATER	6364	NA	NA	66.33
316	ASCNF10357	ANGLIAN WATER	1350	3905.28	2.8928	310.25
317	AWNNF13136	ANGLIAN WATER	560	1676.16	2.99314285714286	259.5
318	AW1NF2543	ANGLIAN WATER	426	1183.68	2.77859154929577	44.5
319	AECNF10530	ANGLIAN WATER	2650	6912	2.60830188679245	1203.5
320	AEENF12033	ANGLIAN WATER	1125	2928.96	2.60352	0.25
321	AW2NF335	ANGLIAN WATER	1430	4320	3.02097902097902	326.5
322	ASETS1320	ANGLIAN WATER	2000	5184	2.592	200.77
323	AW3NFF1300	ANGLIAN WATER	5.9	198.72	33.6813559322034	141.5
324	AW5NF204	ANGLIAN WATER	135	356.832	2.6432	169.57
325	AW4TF1789	ANGLIAN WATER	66250	198720	2.99954716981132	4669.57
326	AW1NF578	ANGLIAN WATER	150	406.08	2.7072	169.41
327	AW5NF5224	ANGLIAN WATER	101	362.88	3.59287128712871	9.75
328	AW2NF811	ANGLIAN WATER	660	1857.6	2.81454545454545	2342.5
329	AW5NF810	ANGLIAN WATER	3200	9815.04	3.0672	924
330	AWCNF11058	ANGLIAN WATER	162	423.36	2.61333333333333	2980.75
331	ANNNF1407	ANGLIAN WATER	120	311.04	2.592	12.77
332	ASETS1322	ANGLIAN WATER	7500	40003.2	5.33376	489.5
333	ASENF10537	ANGLIAN WATER	580	1632.96	2.81544827586207	976.75
334	AW3TS154	ANGLIAN WATER	2232	5875.2	2.63225806451613	3020.5
335	AECNF1958	ANGLIAN WATER	1100	2592	2.35636363636364	714.5
336	ASETS1250	ANGLIAN WATER	4800	12787.2	2.664	18.5
337	AW3NFF1067	ANGLIAN WATER	1406	3888	2.76529160739687	119.22
338	AW5NF598A	ANGLIAN WATER	105	362.88	3.456	1.48
339	AECNF1402	ANGLIAN WATER	550	1036.8	1.88509090909091	74.5
340	ASETS12105	ANGLIAN WATER	8100	17962.56	2.2176	435.5
341	AWCNF11516	ANGLIAN WATER	900	2082.24	2.3136	1355.5
342	AW4NF430X	ANGLIAN WATER	4400	11491.2	2.61163636363636	866.25
343	AWNNF13310	ANGLIAN WATER	296	820.8	2.77297297297297	1024.5
344	CSSC.4458	ANGLIAN WATER	6970	16848	2.41721664275466	341
345	CNTW.0794	ANGLIAN WATER	13000	16416	1.26276923076923	551.75
346	CSSC.4457	ANGLIAN WATER	6060	21600	3.56435643564356	77.5
347	CASM.0340	ANGLIAN WATER	60000	NA	NA	285.75
348	223/0931	NORTHUMBRIAN WATER	2512	6912	2.7515923566879	169.33
349	245/1245	NORTHUMBRIAN WATER	8866	16502.4	1.86131288066772	699.13
350	25/02/1111	NORTHUMBRIAN WATER	3639	8199.36	2.25319043693322	37
351	25/02/1080	NORTHUMBRIAN WATER	290	354.24	1.22151724137931	301.5
352	221/1034	NORTHUMBRIAN WATER	560	1248.48	2.22942857142857	2331.15
353	25/03/1221	NORTHUMBRIAN WATER	274	639.36	2.33343065693431	285.07
354	254/1965	NORTHUMBRIAN WATER	11941	29376	2.46009546939117	689.5
355	243/0970	NORTHUMBRIAN WATER	2618	8208	3.13521772345302	424.48
356	245/1242	NORTHUMBRIAN WATER	8635	16761.6	1.94112333526346	840.31
357	25/03/1218	NORTHUMBRIAN WATER	1182	2367.36	2.00284263959391	230.5
358	25/02/1078	NORTHUMBRIAN WATER	351	889.92	2.53538461538462	1196.71
359	232/1098	NORTHUMBRIAN WATER	1284	3006.72	2.34168224299065	593.67
360	255/1220	NORTHUMBRIAN WATER	117	274.752	2.34830769230769	552.97
361	255/1144	NORTHUMBRIAN WATER	66442	160358.4	2.41350952710635	565.44
362	226/1281	NORTHUMBRIAN WATER	142	604.8	4.25915492957747	339.58
363	210/0887	NORTHUMBRIAN WATER	40	NA	NA	0.75
364	251/0940	NORTHUMBRIAN WATER	90	207.36	2.304	308.12
365	25/06/1015	NORTHUMBRIAN WATER	26716	66787.2	2.4998951938913	1117.54
366	242/A/0706	NORTHUMBRIAN WATER	263	665.28	2.52958174904943	197.38
367	210/1295	NORTHUMBRIAN WATER	106	216	2.0377358490566	1970.67
368	223/0820	NORTHUMBRIAN WATER	630	959.04	1.52228571428571	224.25
369	254/1966	NORTHUMBRIAN WATER	41815	82080	1.96293196221452	922.78
370	245/1248	NORTHUMBRIAN WATER	1650	3844.8	2.33018181818182	903.39
371	EPRHB3394ND	NORTHUMBRIAN WATER	NA	NA	NA	1.27
372	25/02/1109	NORTHUMBRIAN WATER	788	1425.6	1.80913705583756	3
373	253/1269	NORTHUMBRIAN WATER	2747	6505.92	2.36837277029487	1392.68
374	244/1027	NORTHUMBRIAN WATER	1730	4515.264	2.60997919075145	367
375	T/80/45928/R	SEVERN TRENT	5.8	28.512	4.91586206896552	40.3683333
376	S/17/26461/R	SEVERN TRENT	300	1219.968	4.06656	1127.552763
377	T/65/45944/R	SEVERN TRENT	6.2	30.24	4.87741935483871	146.1713889
378	T/51/45648/R	SEVERN TRENT	350	643.68	1.83908571428571	1096.419439
379	T/15/36157/R	SEVERN TRENT	1380	NA	NA	209.3066664
380	T/02/36078/R	SEVERN TRENT	143	501.12	3.50433566433566	546.4002774
381	T/67/45582/R	SEVERN TRENT	4340	8553.6	1.97087557603687	799.71
382	S/17/26154/R	SEVERN TRENT	145	803.52	5.54151724137931	40.24611108
383	T/39/46184/R	SEVERN TRENT	4250	12147.84	2.85831529411765	1454.803054
384	T/20/35726/R	SEVERN TRENT	635	1693.44	2.66683464566929	208.7933324
385	T/67/45414/R	SEVERN TRENT	3200	6825.6	2.133	1114.48
386	T/11/35953/R	SEVERN TRENT	1780	4950.72	2.78130337078652	1730.211665
387	T/38/45845/R	SEVERN TRENT	1495	3456	2.31170568561873	239.6316655
388	T/24/35673/R	SEVERN TRENT	2650	3974.4	1.49977358490566	395.4355549
389	T/11/35994/R	SEVERN TRENT	14387	34128	2.37214151664697	862.6583322
390	T/16/36166/R	SEVERN TRENT	55	120.96	2.19927272727273	253.4591664
391	S/15/25830/R	SEVERN TRENT	172	984.96	5.72651162790698	69.13833221
392	T/19/36017/R	SEVERN TRENT	2912	8726.4	2.9967032967033	71.64055543
393	T/11/35941/R	SEVERN TRENT	45.8	290.304	6.3385152838428	1758.741666
394	T/62/45769/R	SEVERN TRENT	9100	13677.12	1.50298021978022	1039.18
395	S/16/26290/R	SEVERN TRENT	2756	7896.96	2.86537010159652	439.2974998
396	S/14/25492/R	SEVERN TRENT	813	1532.736	1.88528413284133	962.8230537
397	S/05/56191/R	SEVERN TRENT	73	371.52	5.08931506849315	330.1933331
398	EPRWB3435AD	SEVERN TRENT	43	NA	NA	228.416944
399	T/04/36032/R	SEVERN TRENT	16159	41212.8	2.55045485487963	859.9763887
400	T/19/35571/R	SEVERN TRENT	692	2125.44	3.0714450867052	369.2255551
401	T/36/45725/R	SEVERN TRENT	362	751.68	2.07646408839779	772.1488826
402	T/83/45823/R	SEVERN TRENT	3355	9331.2	2.78128166915052	12.35
403	S/11/26693/R	SEVERN TRENT	294	1209.6	4.11428571428571	73.2883328
404	S/17/26552/R	SEVERN TRENT	4220	9072	2.14976303317536	1078.409167
405	T/50/45321/R	SEVERN TRENT	2200	5304.96	2.41134545454545	423.6805553
406	T/19/35774/R	SEVERN TRENT	1850	5529.6	2.98897297297297	421.4002775
407	T/57/45802/R	SEVERN TRENT	700	1779.84	2.54262857142857	355.1794405
408	T/84/45914/R	SEVERN TRENT	933	1837.728	1.96969774919614	235.43
409	T/39/45680/R	SEVERN TRENT	7423	16848	2.26970227670753	1655.130555
410	T/03/36222/R	SEVERN TRENT	17600	41990.4	2.38581818181818	120.7774998
411	T/36/45984/R	SEVERN TRENT	3039	6652.8	2.18914116485686	431.2249971
412	S/20/26207/R	SEVERN TRENT	35000	74995.2	2.14272	2510.832775
413	T/32/36105/R	SEVERN TRENT	12500	39312	3.14496	70.5266662
414	T/30/35983/R	SEVERN TRENT	1200	3317.76	2.7648	52.46388855
415	S/15/25431/R	SEVERN TRENT	250	NA	NA	0.53805555
416	T/73/45819/R	SEVERN TRENT	2461	6350.4	2.58041446566436	387
417	S/10/25817/R	SEVERN TRENT	49	259.2	5.28979591836735	0.476111083
418	T/71/45571/R	SEVERN TRENT	3450	6096.384	1.76706782608696	403.14
419	T/03/35861/R	SEVERN TRENT	4000	7084.8	1.7712	328.8749982
420	T/12/36068/R	SEVERN TRENT	65000	150076.8	2.30887384615385	662.2763873
421	T/24/35915/R	SEVERN TRENT	1054	5616	5.32827324478178	14.33888877
422	T/51/45760/R	SEVERN TRENT	1500	4501.44	3.00096	652.874998
423	T/30/36442/R	SEVERN TRENT	28	NA	NA	26.9594444
424	T/03/20783/R	SEVERN TRENT	8210	23300.352	2.83804531059683	284.6877775
425	S/11/26637/R	SEVERN TRENT	115000	131932.8	1.14724173913044	567.9069443
426	S/17/25857/R	SEVERN TRENT	630	NA	NA	43.07416652
427	T/73/45605/R	SEVERN TRENT	2019	3888	1.92570579494799	918.97
428	S/09/55904/R	SEVERN TRENT	1224	NA	NA	569.2266638
429	T/65/45650/R	SEVERN TRENT	188	1123.2	5.97446808510638	1467.801666
430	T/66/45846/R	SEVERN TRENT	501	1071.36	2.13844311377246	655.49
431	T/48/45678/R	SEVERN TRENT	91500	181872	1.98767213114754	685.2391654
432	T/02/36155/R	SEVERN TRENT	125	432	3.456	1.653055533
433	T/75/46295/R	SEVERN TRENT	5750	13392	2.32904347826087	1452.75
434	S/07/55591/R	SEVERN TRENT	7183	16848	2.34553807601281	567.2336053
435	S/12/26162/R	SEVERN TRENT	976	2712.96	2.77967213114754	55.59027768
436	T/11/35925/R	SEVERN TRENT	440	NA	NA	59.98472207
437	EPRQB3699WX	SEVERN TRENT	454	1365.12	3.00687224669604	215.1280517
438	T/50/45319/R	SEVERN TRENT	5639	13374.72	2.37182479162972	83.35499993
439	T/58/45986/R	SEVERN TRENT	1729	4440.96	2.56851359167149	1085.744435
440	S/04/56016/R	SEVERN TRENT	575	1503.36	2.61453913043478	315.167222
441	S/03/56028/R	SEVERN TRENT	1280	3689.28	2.88225	67.91888858
442	T/02/35657/R	SEVERN TRENT	1650	3741.12	2.26734545454545	1573.040833
443	T/38/45929/R	SEVERN TRENT	120	522.72	4.356	1501.353055
444	T/65/45931/R	SEVERN TRENT	19	93.312	4.91115789473684	155.5577773
445	T/22/35591/R	SEVERN TRENT	170	830.304	4.88414117647059	698.9005553
446	T/30/35824/R	SEVERN TRENT	1250	2700	2.16	1703.03611
447	T/67/45555/R	SEVERN TRENT	625	1234.656	1.9754496	828.42
448	T/36/45583/R	SEVERN TRENT	760	3153.6	4.14947368421053	306.6819443
449	T/67/45832/R	SEVERN TRENT	314	570.24	1.81605095541401	417.0283332
450	T/82/45638/R	SEVERN TRENT	190	544.32	2.86484210526316	19.9
451	T/51/45576/R	SEVERN TRENT	920	2332.8	2.53565217391304	460.1930552
452	T/15/35597/R	SEVERN TRENT	40	120.96	3.024	0
453	T/03/35742/R	SEVERN TRENT	10	NA	NA	0
454	T/69/45776/R	SEVERN TRENT	9100	23155.2	2.54452747252747	861.6258319
455	T/62/46338/R	SEVERN TRENT	1070	2160	2.01869158878505	0
456	T/08/36220/R	SEVERN TRENT	24900	59736.96	2.39907469879518	183.7283329
457	T/51/45910/R	SEVERN TRENT	1160	1987.2	1.71310344827586	603.8938882
458	T/21/36278/R	SEVERN TRENT	1490	4250.88	2.85293959731544	129.5199996
459	T/66/45609/R	SEVERN TRENT	1200	2700	2.25	542.73
460	T/25/36210/R	SEVERN TRENT	154	721.44	4.68467532467533	1217.103889
461	T/83/45790/R	SEVERN TRENT	2050	4777.92	2.33069268292683	394.01
462	T/02/35592/R	SEVERN TRENT	140	737.856	5.2704	1.308611033
463	T/67/45666/R	SEVERN TRENT	29	140.832	4.85627586206897	0
464	EPRTB3938AT	SEVERN TRENT	32	NA	NA	1396.299167
465	T/41/45771/R	SEVERN TRENT	1470	2592	1.76326530612245	1006.682778
466	S/02/56099/R	SEVERN TRENT	781	2341.44	2.99800256081946	640.6697221
467	T/19/36495/R	SEVERN TRENT	16390	37152	2.26674801708359	4018.270555
468	T/76/45601/R	SEVERN TRENT	2158	5477.76	2.53835032437442	72.36
469	S/06/55931/R	SEVERN TRENT	260	673.92	2.592	1079.219721
470	T/53/12089/R	SEVERN TRENT	275	1071.36	3.89585454545455	515.2074982
471	T/20/36246/R	SEVERN TRENT	1927	5123.52	2.65880643487286	679.0594443
472	T/61/45626/R	SEVERN TRENT	10800	27803.52	2.5744	8354
473	T/16/35777/R	SEVERN TRENT	681	1607.04	2.35982378854626	379.9461109
474	T/41/45831/R	SEVERN TRENT	1540	4250.88	2.76031168831169	1039.1075
475	S/12/26557/R	SEVERN TRENT	2881	7145.28	2.48013884068032	593.0055549
476	S/06/56074/R	SEVERN TRENT	26504	64800	2.44491397524902	2887.216666
477	S/10/26413/R	SEVERN TRENT	410	1529.28	3.72995121951219	1791.249444
478	S/06/55384/R	SEVERN TRENT	990	2177.28	2.19927272727273	303.677499283
479	T/61/45171/R	SEVERN TRENT	5790	14722.56	2.54275647668394	79.94861065
480	T/80/45794/R	SEVERN TRENT	900	2013.12	2.2368	150.54
481	S/21/26211/R	SEVERN TRENT	3068	11404.8	3.71734028683181	145.2266664
482	T/76/45987/R	SEVERN TRENT	22	112.32	5.10545454545455	1245.438055
483	T/07/36033/R	SEVERN TRENT	7500	22723.2	3.02976	291.6588833
484	T/17/35743/R	SEVERN TRENT	7000	13824	1.97485714285714	195.4455554
485	S/04/55884/R	SEVERN TRENT	318	794.88	2.49962264150943	118.9055533
486	T/81/45709/R	SEVERN TRENT	11	NA	NA	416.8205549
487	EPRWB3835AM	SEVERN TRENT	8500	21859.2	2.57167058823529	127.5086111
488	S/09/55809/R	SEVERN TRENT	3500	7516.8	2.14765714285714	1283.216384
489	S/09/50131/R	SEVERN TRENT	126	514.944	4.08685714285714	0
490	S/10/26704/R	SEVERN TRENT	2400	6480	2.7	723.550833
491	T/70/46165/R	SEVERN TRENT	22700	68169.6	3.00306607929515	333.09
492	T/20/35543/R	SEVERN TRENT	775	1702.08	2.19623225806452	1224.575277
493	T/40/08170/R	SEVERN TRENT	8246	17986.752	2.18126994906621	2931.462222
494	T/23/35286/R	SEVERN TRENT	1390	NA	NA	2.866944383
495	T/55/45835/R	SEVERN TRENT	12763	47347.2	3.7097234192588	716.9097221
496	T/36/45842/R	SEVERN TRENT	1100	NA	NA	60.48444406
497	T/16/35964/R	SEVERN TRENT	56	138.24	2.46857142857143	407.4811108
498	T/10/36212/R	SEVERN TRENT	225000	725760	3.2256	570.8952777
499	S/13/26230/R	SEVERN TRENT	148	665.28	4.49513513513514	13.6119444
500	S/02/55942/R	SEVERN TRENT	680	1702.08	2.50305882352941	1579.917778
501	S/12/25765/R	SEVERN TRENT	197	1183.68	6.00852791878173	6046.409722
502	T/66/45637/R	SEVERN TRENT	446	993.6	2.22780269058296	1644.73
503	T/73/45847/R	SEVERN TRENT	1000	2203.2	2.2032	2622.48
504	T/23/35565/R	SEVERN TRENT	176	440.64	2.50363636363636	905.1358332
505	S/21/26094/R	SEVERN TRENT	1950	6039.36	3.09710769230769	253.1024998
506	T/50/45372/R	SEVERN TRENT	725	1939.68	2.67542068965517	10.12499997
507	S/04/09049/R	SEVERN TRENT	2500	5864.832	2.3459328	122.2169425
508	T/80/45645/R	SEVERN TRENT	42.5	171.072	4.02522352941176	303.8366661
509	T/11/35235/R	SEVERN TRENT	3180	7430.4	2.33660377358491	1052.590833
510	T/19/36026/R	SEVERN TRENT	22600	NA	NA	154.2930552
511	T/52/45772/R	SEVERN TRENT	4980	9936	1.99518072289157	23.82138855
512	S/03/56061/R	SEVERN TRENT	1700	4320	2.54117647058824	992.1211099
513	S/01/56011/R	SEVERN TRENT	370	1226.88	3.31589189189189	703.0902776
514	T/41/45762/R	SEVERN TRENT	25	146.88	5.8752	207.213055
515	T/23/36076/R	SEVERN TRENT	4582	13616.64	2.97176778699258	593.6749997
516	T/23/35544/R	SEVERN TRENT	455	1192.32	2.62048351648352	600.7813887
517	S/05/55412/R	SEVERN TRENT	330	803.52	2.43490909090909	60.04527762
518	T/03/35658/R	SEVERN TRENT	3200	11491.2	3.591	1408.089444
519	T/61/46266/R	SEVERN TRENT	3907	6134.4	1.57010493985155	1820.66
520	S/21/26069/R	SEVERN TRENT	950	3188.16	3.35595789473684	544.6702761
521	T/21/35970/R	SEVERN TRENT	2600	7231.68	2.78141538461538	2933.209163
522	T/61/45143/R	SEVERN TRENT	3285	6808.32	2.07254794520548	497.8383331
523	EPRPB3099DJ	SEVERN TRENT	4165	11128.32	2.67186554621849	262.5627772
524	T/70/45715/R	SEVERN TRENT	4492	12873.6	2.86589492430988	119.89
525	T/20/35618/R	SEVERN TRENT	420	1157.76	2.75657142857143	1476.826111
526	T/77/45889/R	SEVERN TRENT	358	1010.88	2.82368715083799	0
527	T/69/45500/R	SEVERN TRENT	425	NA	NA	318.7902776
528	T/08/36171/R	SEVERN TRENT	NA	76032	NA	198.0311109
529	T/74/46203/R	SEVERN TRENT	6593	15897.6	2.41128469588958	274.16
530	S/06/55232/R	SEVERN TRENT	59836	153878.4	2.57166922922655	1097.188055
531	T/71/45701/R	SEVERN TRENT	21	NA	NA	11.5
532	S/10/26528/R	SEVERN TRENT	21600	59961.6	2.776	256.171110833
533	T/05/36077/R	SEVERN TRENT	6600	16848	2.55272727272727	654.8008304
534	S/15/26102/R	SEVERN TRENT	464	2073.6	4.46896551724138	442.3238877
535	T/73/46169/R	SEVERN TRENT	263	578.88	2.20106463878327	813.66
536	T/81/46406/R	SEVERN TRENT	22557	62208	2.75781353903445	308.19
537	T/17/35749/R	SEVERN TRENT	1050	2419.2	2.304	495.8613529
538	T/71/45751/R	SEVERN TRENT	2600	6912	2.65846153846154	275.18
539	S/14/26529/R	SEVERN TRENT	1697	7214.4	4.25126694166176	47.40111107
540	T/57/45608/R	SEVERN TRENT	4270	10972.8	2.56974238875878	226.2052764
541	T/69/45943/R	SEVERN TRENT	11	53.568	4.86981818181818	0.070833333
542	T/76/45411/R	SEVERN TRENT	1590	3888	2.44528301886792	738.570555
543	T/41/46401/R	SEVERN TRENT	2100	5270.4	2.50971428571429	766.8749997
544	NPSWQD008782	SEVERN TRENT	2598	4320	1.66281755196305	1566.35
545	S/22/26240/R	SEVERN TRENT	24300	48000.384	1.97532444444444	433.3827761
546	EPRWB3535AJ	SEVERN TRENT	6936	17210.88	2.48138408304498	1494.99111
547	T/61/45964/R	SEVERN TRENT	7760	19612.8	2.52742268041237	65.89
548	T/50/46146/R	SEVERN TRENT	3070	9210.24	3.00007817589577	930.3488886
549	T/69/46017/R	SEVERN TRENT	1400	3283.2	2.34514285714286	1977.13
550	T/22/36211/R	SEVERN TRENT	23840	NA	NA	236.0005538
551	T/41/45656/R	SEVERN TRENT	2112	4008.96	1.89818181818182	295.8388748
552	T/83/45915/R	SEVERN TRENT	1000	3162.24	3.16224	1461.46
553	T/61/45798/R	SEVERN TRENT	23608	45964.8	1.94700101660454	646.18
554	S/06/55363/R	SEVERN TRENT	6460	18515.52	2.86617956656347	0.653333317
555	S/14/26442/R	SEVERN TRENT	181	NA	NA	477.1969438
556	T/69/45814/R	SEVERN TRENT	2090	5270.4	2.52172248803828	248.54
557	T/54/46202/R	SEVERN TRENT	925	2557.44	2.7648	428.6211104
558	T/08/36224/R	SEVERN TRENT	4784	14817.6	3.09732441471572	199.9827776
559	T/53/46354/R	SEVERN TRENT	135000	630547.2	4.67072	934.1969433
560	T/83/45838/R	SEVERN TRENT	2710	6825.6	2.51867158671587	94.41472155
561	S/13/26328/R	SEVERN TRENT	36000	63417.6	1.7616	736.7174997
562	T/03/35649/R	SEVERN TRENT	415	1270.08	3.06043373493976	1185.785555
563	T/54/45993/R	SEVERN TRENT	283	1373.76	4.85427561837456	409.5955554
564	T/41/45991/R	SEVERN TRENT	2430	7283.52	2.99733333333333	2231.710832
565	T/50/45829/R	SEVERN TRENT	6165	16416	2.66277372262774	491.5063881
566	T/73/46317/R	SEVERN TRENT	1155	2931.552	2.53814025974026	13.47333322
567	T/51/46399/R	SEVERN TRENT	10000	NA	NA	53.16222173
568	S/18/26092/R	SEVERN TRENT	1466	4579.2	3.12360163710778	221.278611
569	T/43/45907/R	SEVERN TRENT	1320	3900.96	2.95527272727273	3200.897222
570	S/10/26695/R	SEVERN TRENT	1320	NA	NA	1693.368055
571	T/65/45569/R	SEVERN TRENT	110	388.8	3.53454545454545	132.3461107
572	S/17/26098/R	SEVERN TRENT	250	1235.52	4.94208	604.713884
573	S/15/26259/R	SEVERN TRENT	2200	4907.52	2.23069090909091	271.7483331
574	T/36/45905/R	SEVERN TRENT	515	1546.56	3.00302912621359	584.7952777
575	DRA 459	SOUTH WEST WATER	55.09	326.592	5.92833545108005	1148.81
576	CRA 25	SOUTH WEST WATER	94	335.232	3.56629787234043	2169.6
577	203910	SOUTH WEST WATER	9	NA	NA	47.57
578	NRA-SW-3983	SOUTH WEST WATER	181	587.52	3.24596685082873	1116.34
579	201967	SOUTH WEST WATER	306	803.52	2.62588235294118	11.3
580	DRA 1559	SOUTH WEST WATER	2228.64	6721.92	3.01615334912772	1482.3
581	NRA-SW-3580	SOUTH WEST WATER	103	432	4.19417475728155	104.93
582	SWWA 42	SOUTH WEST WATER	230	604.8	2.6295652173913	1050.64
583	002491	SOUTH WEST WATER	15231	NA	NA	420.68
584	SWWA 880	SOUTH WEST WATER	169	172.8	1.02248520710059	5619.88
585	200364/SF/01	SOUTH WEST WATER	NA	NA	NA	1144.31
586	NRA-SW-3790	SOUTH WEST WATER	675	1192.32	1.7664	3251.87
587	DRA 1155	SOUTH WEST WATER	404.54	1900.8	4.69867009442824	2230.61
588	NRA-SW-6747	SOUTH WEST WATER	162	1036.8	6.4	168.91
589	DRA 1456	SOUTH WEST WATER	363.94	2181.6	5.99439468044183	0
590	NRA-SW-7828	SOUTH WEST WATER	68	864	12.7058823529412	22.84
591	SWWA 488	SOUTH WEST WATER	35	129.6	3.70285714285714	1345.34
592	200261/FN/01	SOUTH WEST WATER	470	NA	NA	0
593	SWWA 1138	SOUTH WEST WATER	104	NA	NA	1117.46
594	NRA-SW-6959	SOUTH WEST WATER	3588	8294.4	2.31170568561873	2023.93
595	DRA 1382	SOUTH WEST WATER	273	1632.96	5.98153846153846	0
596	003101/FN/01	SOUTH WEST WATER	310	950.4	3.0658064516129	75.55
597	NRA-SW-3794	SOUTH WEST WATER	147	362.88	2.46857142857143	5169.63
598	DRA 1538	SOUTH WEST WATER	243.64	1461.888	6.0001970119849	0
599	NRA-SW-6988	SOUTH WEST WATER	68	501.12	7.36941176470588	4.06
600	DRA 456	SOUTH WEST WATER	112	233.28	2.08285714285714	980.84
601	302993	SOUTH WEST WATER	215	777.6	3.61674418604651	265.77
602	200357/FN/01	SOUTH WEST WATER	75	345.6	4.608	1503.28
603	DRA 1512	SOUTH WEST WATER	131	475.2	3.62748091603053	0
604	202009	SOUTH WEST WATER	21818	44755.2	2.05129709414245	1564.5
605	NRA-SW-4946	SOUTH WEST WATER	97	475.2	4.89896907216495	673.96
606	SWWA 728	SOUTH WEST WATER	NA	NA	NA	0
607	203020	SOUTH WEST WATER	124	820.8	6.61935483870968	814.75
608	NRA-SW-5002	SOUTH WEST WATER	3165	6350.4	2.00644549763033	1340.15
609	301299	SOUTH WEST WATER	5013	9158.4	1.82692998204668	252.64
610	SWWA 877	SOUTH WEST WATER	137	432	3.15328467153285	1694.26
611	NRA-SW-3474	SOUTH WEST WATER	155	622.08	4.01341935483871	130.08
612	300705	SOUTH WEST WATER	17698	NA	NA	841.22
613	303000	SOUTH WEST WATER	12000	36288	3.024	1106.38
614	NRA-SW-6619	SOUTH WEST WATER	300	760.32	2.5344	2366.32
615	15/49/281/P/16	SOUTH WEST WATER	338	1555.2	4.60118343195266	358.5
616	303508	SOUTH WEST WATER	2225	5875.2	2.6405393258427	722.33
617	303087	SOUTH WEST WATER	570	NA	NA	1000.87
618	NRA-SW-7825	SOUTH WEST WATER	1010	3024	2.99405940594059	439.59
619	EPRCP3528XH	SOUTH WEST WATER	20	259.2	12.96	341.37
620	SWWA 1137	SOUTH WEST WATER	273	1632.96	5.98153846153846	461.98
621	NRA-SW-3838	SOUTH WEST WATER	103	501.12	4.8652427184466	120.45
622	203442	SOUTH WEST WATER	454	1019.52	2.24563876651982	0
623	SWWA 569	SOUTH WEST WATER	35	138.24	3.94971428571429	4139.97
624	203388	SOUTH WEST WATER	190	838.08	4.41094736842105	455.86
625	202985	SOUTH WEST WATER	115	293.76	2.5544347826087	3507.02
626	NRA-SW-3560	SOUTH WEST WATER	144	552.96	3.84	1336.75
627	NRA-SW-6620	SOUTH WEST WATER	209	1036.8	4.96076555023923	1914.53
628	DRA 159	SOUTH WEST WATER	341	864	2.53372434017595	2242.76
629	NRA-SW-6984	SOUTH WEST WATER	812	1900.8	2.34088669950739	1247.72
630	002728/FN/01	SOUTH WEST WATER	95.5	388.8	4.07120418848168	116.37
631	NRA-SW-7809	SOUTH WEST WATER	110	302.4	2.74909090909091	1803.42
632	DRA 1130	SOUTH WEST WATER	515	2160	4.19417475728155	1033.55
633	200926	SOUTH WEST WATER	56	241.92	4.32	1212.24
634	DRA 441	SOUTH WEST WATER	783	3041.28	3.88413793103448	858.63
635	302487	SOUTH WEST WATER	150	1036.8	6.912	89.14
636	202669	SOUTH WEST WATER	10717	NA	NA	25.79
637	301918	SOUTH WEST WATER	3767	11232	2.98168303689939	870.24
638	DRA 936	SOUTH WEST WATER	2955	NA	NA	0.47
639	202394	SOUTH WEST WATER	4644	NA	NA	174.91
640	NRA-SW-3570	SOUTH WEST WATER	118	501.12	4.24677966101695	118.14
641	NRA-SW-4934	SOUTH WEST WATER	240	673.92	2.808	2142.33
642	201127	SOUTH WEST WATER	1457	2937.6	2.01619766643789	56.95
643	200819	SOUTH WEST WATER	4856	NA	NA	189.16
644	200400	SOUTH WEST WATER	44	NA	NA	97.69
645	DRA 1196	SOUTH WEST WATER	280	475.2	1.69714285714286	3186.16
646	NRA-SW-7808	SOUTH WEST WATER	190	561.6	2.95578947368421	1642.57
647	202711	SOUTH WEST WATER	66	432	6.54545454545455	164.15
648	203161	SOUTH WEST WATER	165	691.2	4.18909090909091	0
649	203027	SOUTH WEST WATER	468	820.8	1.75384615384615	1569.76
650	203109	SOUTH WEST WATER	314	1382.4	4.40254777070064	404.74
651	SWWA 852	SOUTH WEST WATER	69	518.4	7.51304347826087	370.18
652	200365/FN/01	SOUTH WEST WATER	59.6	357.696	6.00161073825503	384.23
653	DRA 239	SOUTH WEST WATER	91	545.184	5.99103296703297	1408.85
654	SWWA 730	SOUTH WEST WATER	50	406.08	8.1216	31.83
655	301142	SOUTH WEST WATER	17950	40348.8	2.24784401114206	961.83
656	NRA-SW-0222	SOUTH WEST WATER	140	345.6	2.46857142857143	103.99
657	202475	SOUTH WEST WATER	40486	84758.4	2.09352368720051	465.6
658	003174/FU/02	SOUTH WEST WATER	11825	NA	NA	1128.35
659	NRA-SW-3495	SOUTH WEST WATER	120	492.48	4.104	193.73
660	302642	SOUTH WEST WATER	9500	22377.6	2.35553684210526	355.25
661	SWWA 944	SOUTH WEST WATER	1620	5184	3.2	374.69
662	NRA-SW-5666	SOUTH WEST WATER	207	889.92	4.29913043478261	824.75
663	202412	SOUTH WEST WATER	184	527.04	2.86434782608696	19.53
664	302530	SOUTH WEST WATER	1843	NA	NA	1393.87
665	200356/FN/01	SOUTH WEST WATER	61	364.608	5.97718032786885	14.1
666	NRA-SW-3701	SOUTH WEST WATER	293	630.72	2.15262798634812	1584.93
667	SWWA 2214	SOUTH WEST WATER	297	NA	NA	1923.97
668	302125	SOUTH WEST WATER	297	691.2	2.32727272727273	2006.92
669	SWWA 2106	SOUTH WEST WATER	29.6	81.216	2.74378378378378	2327.36
670	200594/PW/01	SOUTH WEST WATER	299	NA	NA	214.3
671	NRA-SW-5295	SOUTH WEST WATER	150	351.648	2.34432	2635.24
672	203562	SOUTH WEST WATER	242	691.2	2.85619834710744	2229.52
673	SWWA 2413	SOUTH WEST WATER	330	950.4	2.88	1690.36
674	002027	SOUTH WEST WATER	147	440.64	2.99755102040816	962.24
675	NRA-SW-0007	SOUTH WEST WATER	143	449.28	3.14181818181818	864.63
676	DRA 192	SOUTH WEST WATER	278	682.56	2.45525179856115	1306.88
677	NRA-SW-0782	SOUTH WEST WATER	19704	58320	2.95980511571255	542.08
678	203812	SOUTH WEST WATER	3563	7776	2.18243053606511	1578.74
679	302822	SOUTH WEST WATER	2893	8208	2.83719322502592	114.31
680	DRA 1351	SOUTH WEST WATER	151.72	NA	NA	684.88
681	SWWA 2475	SOUTH WEST WATER	119	224.64	1.88773109243698	1221.22
682	202474	SOUTH WEST WATER	446	2505.6	5.61793721973094	26.75
683	SWWA 2251	SOUTH WEST WATER	36.4	267.84	7.35824175824176	1275.53
684	NRA-SW-6975	SOUTH WEST WATER	750	2160	2.88	2673.86
685	NRA-SW-3869	SOUTH WEST WATER	3115	6652.8	2.13573033707865	3709.13
686	302126	SOUTH WEST WATER	945	1728	1.82857142857143	2134.1
687	202413	SOUTH WEST WATER	117	604.8	5.16923076923077	529.27
688	203299	SOUTH WEST WATER	2961	6480	2.18844984802432	1175.78
689	15/49/30/P/10	SOUTH WEST WATER	262	665.28	2.53923664122137	1398.3
690	203406	SOUTH WEST WATER	475	2427.84	5.11124210526316	509.96
691	203223	SOUTH WEST WATER	5505	NA	NA	53.44
692	202367	SOUTH WEST WATER	53	259.2	4.89056603773585	686.27
693	203413	SOUTH WEST WATER	203	490.752	2.41749753694581	1868.34
694	302508	SOUTH WEST WATER	675	1641.6	2.432	789.45
695	303086	SOUTH WEST WATER	204	1036.8	5.08235294117647	204.21
696	15/47/41/P/6	SOUTH WEST WATER	126.5	NA	NA	2019.58
697	NRA-SW-5475	SOUTH WEST WATER	1390	3024	2.17553956834532	2096.18
698	303090	SOUTH WEST WATER	94	604.8	6.43404255319149	0
699	NRA-SW-0237	SOUTH WEST WATER	390	656.64	1.68369230769231	278.13
700	300914	SOUTH WEST WATER	3076	NA	NA	1198.62
701	NRA-SW-0215	SOUTH WEST WATER	4100	16416	4.00390243902439	410.08
702	DRA 1349	SOUTH WEST WATER	197	604.8	3.07005076142132	72.2
703	15/47/52/P/11	SOUTH WEST WATER	300	864	2.88	494.82
704	NRA-SW-3789	SOUTH WEST WATER	2829	6307.2	2.22948038176034	986.04
705	NRA-SW-3676	SOUTH WEST WATER	187	907.2	4.85133689839572	497.65
706	033125/FN/01	SOUTH WEST WATER	211	NA	NA	0
707	003269	SOUTH WEST WATER	3022	10514.88	3.47944407677035	468.54
708	202404	SOUTH WEST WATER	524	1641.6	3.13282442748092	186.72
709	NRA-SW-7351	SOUTH WEST WATER	100	198.72	1.9872	1184.16
710	303089	SOUTH WEST WATER	66	345.6	5.23636363636364	1657.39
711	15/47/41/P/5	SOUTH WEST WATER	155	432	2.78709677419355	2417.71
712	15/48/171/P/3A	SOUTH WEST WATER	273	604.8	2.21538461538462	728.42
713	NRA-SW-4999	SOUTH WEST WATER	161	518.4	3.21987577639752	3648.41
714	NRA-SW-6977	SOUTH WEST WATER	17266	40003.2	2.31687709950191	694.39
715	SWWA 523	SOUTH WEST WATER	NA	NA	NA	401
716	203312	SOUTH WEST WATER	283	1123.2	3.96890459363958	2031.07
717	NRA-SW-7829/FN/1	SOUTH WEST WATER	2047	2764.8	1.35065950170982	699.5
718	SWWA 2259	SOUTH WEST WATER	270	1036.8	3.84	411.26
719	201054	SOUTH WEST WATER	40	NA	NA	114.55
720	NRA-SW-3402	SOUTH WEST WATER	98	483.84	4.93714285714286	599.21
721	NRA-SW-3912	SOUTH WEST WATER	700	1123.2	1.60457142857143	2513.23
722	302505	SOUTH WEST WATER	280	1123.2	4.01142857142857	911.28
723	NRA-SW-6964	SOUTH WEST WATER	36	NA	NA	352.48
724	300911	SOUTH WEST WATER	10737	NA	NA	19.89
725	302298	SOUTH WEST WATER	2390	5961.6	2.49439330543933	215.84
726	NRA-SW-6621	SOUTH WEST WATER	41.8	224.64	5.37416267942584	349.04
727	NRA-SW-6684	SOUTH WEST WATER	285	924.48	3.24378947368421	326.01
728	SWWA 1148	SOUTH WEST WATER	51	259.2	5.08235294117647	901.98
729	302043	SOUTH WEST WATER	720	NA	NA	8.73
730	NRA-SW-0247	SOUTH WEST WATER	300	777.6	2.592	0
731	NRA-SW-3765	SOUTH WEST WATER	62	319.68	5.15612903225807	587.05
732	SWWA 206	SOUTH WEST WATER	132	395.712	2.99781818181818	1872.26
733	NRA-SW-0005	SOUTH WEST WATER	417	950.4	2.27913669064748	1121.59
734	200366	SOUTH WEST WATER	80	328.32	4.104	145.46
735	200413	SOUTH WEST WATER	70	414.72	5.92457142857143	579.34
736	202463	SOUTH WEST WATER	2246	5443.2	2.42350845948353	963.43
737	202411	SOUTH WEST WATER	1643	NA	NA	27.33
738	NRA-SW-4009	SOUTH WEST WATER	310	941.76	3.03793548387097	1981.61
739	NRA-SW-0411	SOUTH WEST WATER	94	362.88	3.86042553191489	1541.63
740	031299/FN/01	SOUTH WEST WATER	8414	NA	NA	141.1
741	NRA-SW-6627	SOUTH WEST WATER	88	406.08	4.61454545454546	407.86
742	SWWA 2498	SOUTH WEST WATER	132	216	1.63636363636364	499.33
743	NRA-SW-6741	SOUTH WEST WATER	96	483.84	5.04	1130.59
744	303347	SOUTH WEST WATER	30154	60480	2.00570405253034	973.33
745	201033	SOUTH WEST WATER	70	NA	NA	620.06
746	303399	SOUTH WEST WATER	485	2851.2	5.87876288659794	0.05
747	NRA-SW-3743	SOUTH WEST WATER	96.8	414.72	4.28429752066116	719.69
748	EPRCP3620XD	SOUTH WEST WATER	1386	10195.2	7.35584415584416	90.6
749	300827/FN/01	SOUTH WEST WATER	720	NA	NA	1159.06
750	034544	SOUTH WEST WATER	968	NA	NA	0
751	300072/FN/01	SOUTH WEST WATER	156.4	NA	NA	0
752	NRA-SW-7821	SOUTH WEST WATER	389.5	613.44	1.57494223363286	368.45
753	302417	SOUTH WEST WATER	70	2160	30.8571428571429	4570.3
754	301935	SOUTH WEST WATER	4501	15552	3.45523217062875	160.23
755	DRA 308	SOUTH WEST WATER	429	915.84	2.13482517482517	1632.58
756	DRA 20	SOUTH WEST WATER	296	933.12	3.15243243243243	664.75
757	NRA-SW-3657	SOUTH WEST WATER	95	362.88	3.81978947368421	0
758	NRA-SW-6622	SOUTH WEST WATER	127	578.88	4.55811023622047	3166.57
759	001685/FU/01	SOUTH WEST WATER	1829	760.32	0.415702569710224	234.07
760	DRA 262	SOUTH WEST WATER	118	708.48	6.00406779661017	59.42
761	202563	SOUTH WEST WATER	2493	7171.2	2.87653429602888	882.44
762	SWWA 496	SOUTH WEST WATER	45	138.24	3.072	594.2
763	NRA-SW-6171	SOUTH WEST WATER	14	69.12	4.93714285714286	2003.27
764	NRA-SW-3849	SOUTH WEST WATER	106.8	432	4.04494382022472	1510.35
765	CRA 156	SOUTH WEST WATER	23.89	NA	NA	293.69
766	200834	SOUTH WEST WATER	6331	NA	NA	48.27
767	NRA-SW-6082	SOUTH WEST WATER	320	1036.8	3.24	410.94
768	NRA-SW-5654	SOUTH WEST WATER	1300	2626.56	2.02043076923077	1595.84
769	303394	SOUTH WEST WATER	1260	3110.4	2.46857142857143	2.63
770	SWWA 146	SOUTH WEST WATER	2728	7680.96	2.81560117302053	653.78
771	031294	SOUTH WEST WATER	6067	12700.8	2.09342343827262	1197.86
772	15/48/24/P/4	SOUTH WEST WATER	111	397.44	3.58054054054054	496.2
773	SWWA 5	SOUTH WEST WATER	337	1684.8	4.99940652818991	692.64
774	203034	SOUTH WEST WATER	777	1019.52	1.31212355212355	298.54
775	DRA 1062	SOUTH WEST WATER	509	2160	4.24361493123772	1121.54
776	15/47/1/P/9	SOUTH WEST WATER	76	389.664	5.12715789473684	2330.58
777	203380	SOUTH WEST WATER	34	NA	NA	0
778	NRA-SW-6746	SOUTH WEST WATER	308	1080	3.50649350649351	0
779	302956	SOUTH WEST WATER	753	1728	2.29482071713147	1454.1
780	303683	SOUTH WEST WATER	2080	6739.2	3.24	60.91
781	NRA-SW-3885	SOUTH WEST WATER	370	941.76	2.5452972972973	7486.02
782	15/48/231/P/19	SOUTH WEST WATER	250	349.056	1.396224	436.61
783	SWWA 200	SOUTH WEST WATER	131	NA	NA	23.98
784	NRA-SW-6981	SOUTH WEST WATER	2510	7776	3.09800796812749	1176.34
785	303083	SOUTH WEST WATER	185	691.2	3.73621621621622	1124.13
786	303084	SOUTH WEST WATER	196	864	4.40816326530612	700.91
787	NRA-SW-0414	SOUTH WEST WATER	281.5	1684.8	5.98507992895204	19.36
788	NRA-SW-6625	SOUTH WEST WATER	202	1209.6	5.98811881188119	24.68
789	302142	SOUTH WEST WATER	126	691.2	5.48571428571429	101.94
790	302908	SOUTH WEST WATER	241	864	3.5850622406639	3179.46
791	NRA-SW-6743	SOUTH WEST WATER	169	682.56	4.03881656804734	271.36
792	203410	SOUTH WEST WATER	122	259.2	2.12459016393443	264.66
793	NRA-SW-0257	SOUTH WEST WATER	115	604.8	5.25913043478261	47.33
794	SWWA 2064	SOUTH WEST WATER	132	432	3.27272727272727	1981.82
795	DRA 248	SOUTH WEST WATER	9	NA	NA	70.84
796	NRA-SW-6737	SOUTH WEST WATER	83.9	380.16	4.5311084624553	711.37
797	203249	SOUTH WEST WATER	937	1900.8	2.02860192102455	1968.61
798	NRA-SW-3897	SOUTH WEST WATER	110	532.224	4.8384	15.15
799	DRA 1355	SOUTH WEST WATER	309	1243.296	4.02361165048544	11.11
800	NRA-SW-6990	SOUTH WEST WATER	4546	10108.8	2.22366915970084	266.37
801	203792	SOUTH WEST WATER	1885	6220.8	3.30015915119363	747.89
802	200976	SOUTH WEST WATER	42396	NA	NA	242.12
803	203080	SOUTH WEST WATER	3967	8208	2.06906982606504	935.59
804	303096	SOUTH WEST WATER	1042	NA	NA	16.9
805	201437	SOUTH WEST WATER	6900	9936	1.44	222.25
806	302998	SOUTH WEST WATER	2333	NA	NA	617.82
807	302707	SOUTH WEST WATER	7020	20563.2	2.92923076923077	611.53
808	203806	SOUTH WEST WATER	42	198.72	4.73142857142857	484.72
809	SWWA 6	SOUTH WEST WATER	564	1641.6	2.91063829787234	231.21
810	NRA-SW-6965	SOUTH WEST WATER	100	518.4	5.184	161.26
811	NRA-SW-6742	SOUTH WEST WATER	107	518.4	4.84485981308411	6.75
812	202222	SOUTH WEST WATER	34	216	6.35294117647059	2128.57
813	15/47/42/P/5	SOUTH WEST WATER	156	518.4	3.32307692307692	1122.27
814	NRA-SW-3706	SOUTH WEST WATER	400	1019.52	2.5488	878.18
815	203206	SOUTH WEST WATER	110	380.16	3.456	386.42
816	NRA-SW-0423	SOUTH WEST WATER	88.8	535.68	6.03243243243243	223.19
817	302738	SOUTH WEST WATER	36	NA	NA	468.62
818	203113	SOUTH WEST WATER	613	3196.8	5.21500815660685	1027.05
819	SWWA 1003	SOUTH WEST WATER	83	864	10.4096385542169	36.08
820	202848	SOUTH WEST WATER	408	967.68	2.37176470588235	1625.88
821	NRA-SW-2877	SOUTH WEST WATER	101	423.36	4.19168316831683	189.78
822	DRA 1539	SOUTH WEST WATER	140	86.4	0.617142857142857	25.92
823	002671/FU/01	SOUTH WEST WATER	5342	NA	NA	1833.28
824	NRA-SW-0272	SOUTH WEST WATER	250	777.6	3.1104	604.89
825	003126/FN/01	SOUTH WEST WATER	144	1036.8	7.2	203.98
826	SWWA 683	SOUTH WEST WATER	404	1140.48	2.8229702970297	1289.82
827	NRA-SW-0227	SOUTH WEST WATER	166	1036.8	6.24578313253012	289.52
828	300436/FN/01	SOUTH WEST WATER	250	743.04	2.97216	66.61
829	NRA-SW-6626	SOUTH WEST WATER	493	1080	2.19066937119675	1711.39
830	NRA-SW-3518	SOUTH WEST WATER	63	285.12	4.52571428571429	0
831	A00805	SOUTHERN WATER	24000	59961.6	2.4984	957.56
832	W00538	SOUTHERN WATER	1493	3369.6	2.2569323509712	775.93
833	A01510	SOUTHERN WATER	614	1140.48	1.85745928338762	541.95
834	W00532	SOUTHERN WATER	20176	37497.6	1.85852498017446	51.39
835	W00489	SOUTHERN WATER	244	1641.6	6.72786885245902	426.89
836	A00857	SOUTHERN WATER	33869	79660.8	2.35202692727863	1258.26
837	A00191	SOUTHERN WATER	177	302.4	1.70847457627119	857.35
838	W00542	SOUTHERN WATER	605	1987.2	3.28462809917355	545.19
839	A01131	SOUTHERN WATER	639	1658.88	2.59605633802817	1266.91
840	W00379	SOUTHERN WATER	245	777.6	3.17387755102041	6.12
841	W00377	SOUTHERN WATER	267	933.12	3.49483146067416	901.29
842	W00511	SOUTHERN WATER	7000	15638.4	2.23405714285714	84.89
843	A01484	SOUTHERN WATER	244	596.16	2.44327868852459	592.51
844	W00545	SOUTHERN WATER	375	1762.56	4.70016	288.66
845	A01201	SOUTHERN WATER	75	483.84	6.4512	184.97
846	A00804	SOUTHERN WATER	19291	39139.2	2.02888393551397	0
847	W00520	SOUTHERN WATER	2524	7257.6	2.87543581616482	123.35
848	NPSWQD005970	SOUTHERN WATER	13.9	NA	NA	0
849	W00560	SOUTHERN WATER	205	613.44	2.99239024390244	29.46
850	W00028	SOUTHERN WATER	106	734.4	6.92830188679245	156.89
851	W00529	SOUTHERN WATER	214	1287.36	6.01570093457944	124.33
852	A01166	SOUTHERN WATER	3162	6912	2.18595825426945	403.52
853	W00503	SOUTHERN WATER	12200	30672	2.51409836065574	132.11
854	W00235	SOUTHERN WATER	6330	12700.8	2.00644549763033	0
855	A00601	SOUTHERN WATER	416	1641.6	3.94615384615385	246.94
856	A01480	SOUTHERN WATER	101	682.56	6.7580198019802	242.89
857	A01164	SOUTHERN WATER	7120	19008	2.66966292134831	145.29
858	A01217	SOUTHERN WATER	624	1097.28	1.75846153846154	1798.13
859	W00502	SOUTHERN WATER	266	1598.4	6.00902255639098	63.4
860	A01223	SOUTHERN WATER	216	1486.08	6.88	57.05
861	A00152	SOUTHERN WATER	16500	49248	2.98472727272727	363.48
862	A01218	SOUTHERN WATER	420	2894.4	6.89142857142857	30.16
863	A00005	SOUTHERN WATER	70	345.6	4.93714285714286	642.23
864	W00517	SOUTHERN WATER	688	4320	6.27906976744186	110.32
865	A01209	SOUTHERN WATER	5833	11145.6	1.91078347334133	1411.2
866	A00194	SOUTHERN WATER	3656	7171.2	1.96148796498906	1027.7
867	W00104	SOUTHERN WATER	20	120.96	6.048	459.12
868	A01501	SOUTHERN WATER	767	NA	NA	1450.7
869	A01165	SOUTHERN WATER	264	604.8	2.29090909090909	1348.9
870	A00712	SOUTHERN WATER	9933	24624	2.47900936273029	4.53
871	A00016	SOUTHERN WATER	40007	73440	1.83567875621766	574.38
872	A01213	SOUTHERN WATER	29120	NA	NA	3.48
873	W00589	SOUTHERN WATER	620	3075.84	4.96103225806452	85.96
874	W00368	SOUTHERN WATER	959	3024	3.15328467153285	895.03
875	NPSWQD010441	SOUTHERN WATER	1160	691.2	0.595862068965517	26.65
876	W00131	SOUTHERN WATER	59683	125280	2.09909019318734	585.97
877	A01500	SOUTHERN WATER	2746	6739.2	2.45418790968682	155.63
878	W00587	SOUTHERN WATER	2219	9244.8	4.16620099143759	259.14
879	A00193	SOUTHERN WATER	4724	11577.6	2.45080440304826	900.24
880	A00665	SOUTHERN WATER	17200	32400	1.88372093023256	951.74
881	A01175	SOUTHERN WATER	9	55.296	6.144	0.77
882	W00219	SOUTHERN WATER	7379	15984	2.16614717441388	70.62
883	A00020	SOUTHERN WATER	1935	3110.4	1.60744186046512	202.68
884	A00002	SOUTHERN WATER	423	1002.24	2.36936170212766	1247.28
885	NPSWQD003871	SOUTHERN WATER	26	432	16.6153846153846	0
886	W00154	SOUTHERN WATER	756	1555.2	2.05714285714286	720.64
887	A00533	SOUTHERN WATER	1594	3888	2.43914680050188	407.68
888	A01230	SOUTHERN WATER	53	302.4	5.70566037735849	77.26
889	W00008	SOUTHERN WATER	10725	29116.8	2.71485314685315	505.21
890	A01205	SOUTHERN WATER	261	630.72	2.41655172413793	1018.73
891	A00197	SOUTHERN WATER	100	NA	NA	367.67
892	W00384	SOUTHERN WATER	5800	17366.4	2.99420689655172	511.71
893	W00383	SOUTHERN WATER	3194	8726.4	2.73212273011897	250.64
894	W00533	SOUTHERN WATER	1368	9417.6	6.88421052631579	111.28
895	W00481	SOUTHERN WATER	387	2505.6	6.47441860465116	0
896	A01200	SOUTHERN WATER	54	371.52	6.88	8.97
897	A01199	SOUTHERN WATER	119	777.6	6.5344537815126	130.11
898	A00591	SOUTHERN WATER	339	820.8	2.4212389380531	735.8
899	W00577	SOUTHERN WATER	848	5875.2	6.92830188679245	0
900	W00579	SOUTHERN WATER	55	NA	NA	39.06
901	A01102	SOUTHERN WATER	7608	17712	2.32807570977918	874.16
902	A01125	SOUTHERN WATER	3000	5875.2	1.9584	0
903	A00199	SOUTHERN WATER	2348	7516.8	3.20136286201022	300.69
904	W00506	SOUTHERN WATER	545	NA	NA	28.68
905	A00036	SOUTHERN WATER	11800	35424	3.00203389830508	226.29
906	A00534	SOUTHERN WATER	5000	15033.6	3.00672	125.48
907	A01204	SOUTHERN WATER	513	1123.2	2.18947368421053	110.13
908	W00033	SOUTHERN WATER	1092	6566.4	6.01318681318681	57.99
909	A00814	SOUTHERN WATER	8640	25920	3	72.28
910	A00200	SOUTHERN WATER	8850	22464	2.53830508474576	991.81
911	A01222	SOUTHERN WATER	475	3265.92	6.87562105263158	1.23
912	A00856	SOUTHERN WATER	15000	36892.8	2.45952	127.98
913	A01107	SOUTHERN WATER	38725	NA	NA	37.13
914	A01206	SOUTHERN WATER	324	2125.44	6.56	79.74
915	A00853	SOUTHERN WATER	216	NA	NA	207.38
916	A00797	SOUTHERN WATER	3024	7344	2.42857142857143	118.37
917	W00006	SOUTHERN WATER	3100	9244.8	2.9821935483871	0
918	W00242	SOUTHERN WATER	200	604.8	3.024	316.07
919	A00751	SOUTHERN WATER	108853	84931.2	0.780237568096424	761.72
920	A00154	SOUTHERN WATER	32000	68083.2	2.1276	127.95
921	W00311	SOUTHERN WATER	1233	2799.36	2.27036496350365	443.44
922	W00246	SOUTHERN WATER	294	717.12	2.43918367346939	0
923	W00250	SOUTHERN WATER	284	1123.2	3.95492957746479	262.13
924	W00313	SOUTHERN WATER	690	1987.2	2.88	192.19
925	W00237	SOUTHERN WATER	972	2678.4	2.75555555555556	1840.31
926	W00247	SOUTHERN WATER	175	864	4.93714285714286	284.97
927	W00244	SOUTHERN WATER	776	1615.68	2.0820618556701	887.63
928	W00401	SOUTHERN WATER	1222	2592	2.12111292962357	607.16
929	A01106	SOUTHERN WATER	34733	74131.2	2.1343160682924	328.58
930	W00236	SOUTHERN WATER	1182	2280.96	1.9297461928934	511.22
931	W00227	SOUTHERN WATER	1153	3024	2.62272333044232	0.33
932	W00314	SOUTHERN WATER	27700	86400	3.11913357400722	291.71
933	W00240	SOUTHERN WATER	290	432	1.48965517241379	1157.38
934	W00248	SOUTHERN WATER	540	1036.8	1.92	57.11
935	W00424	SOUTHERN WATER	4980	11404.8	2.29012048192771	329.55
936	W00288	SOUTHERN WATER	16317	36460.8	2.23452840595698	367.11
937	W00241	SOUTHERN WATER	231	691.2	2.99220779220779	1690.48
938	W00238	SOUTHERN WATER	367	1900.8	5.17929155313352	0
939	W00598	SOUTHERN WATER	750	NA	NA	848.93
940	A00527	SOUTHERN WATER	428	NA	NA	578.58
941	W00155	SOUTHERN WATER	117	648	5.53846153846154	57.15
942	A00640	SOUTHERN WATER	1834	2548.8	1.38974918211559	2395.64
943	A00726	SOUTHERN WATER	24365	72576	2.97869895341679	1262.93
944	W00147	SOUTHERN WATER	552	3456	6.26086956521739	18.25
945	A00198	SOUTHERN WATER	300	803.52	2.6784	787.45
946	A00667	SOUTHERN WATER	250	950.4	3.8016	140.31
947	A00602	SOUTHERN WATER	2223	5270.4	2.37085020242915	421.17
948	W00494	SOUTHERN WATER	25352	100137.6	3.94988955506469	2.33
949	W00203	SOUTHERN WATER	875	5184	5.92457142857143	160.81
950	W00514	SOUTHERN WATER	605	3516.48	5.81236363636364	227.88
951	A01112	SOUTHERN WATER	42512	NA	NA	426.81
952	W00530	SOUTHERN WATER	1685	NA	NA	4.97
953	W00497	SOUTHERN WATER	1337	2592	1.93866866118175	919.72
954	W00004	SOUTHERN WATER	1202	2937.6	2.44392678868552	179.28
955	W00024	SOUTHERN WATER	103	250.56	2.4326213592233	311.55
956	W00022	SOUTHERN WATER	2090	6048	2.89377990430622	0
957	W00512	SOUTHERN WATER	4500	18921.6	4.2048	45.44
958	W00599	SOUTHERN WATER	1120	NA	NA	23.86
959	W00519	SOUTHERN WATER	3510	8899.2	2.53538461538462	14.59
960	A00643	SOUTHERN WATER	5903	9504	1.61002879891581	448.71
961	A00528	SOUTHERN WATER	2240	5603.904	2.50174285714286	546.74
962	W00564	SOUTHERN WATER	1779	6048	3.39966273187184	325.94
963	K02057	SOUTHERN WATER	402	2764.8	6.87761194029851	29.4
964	W00021	SOUTHERN WATER	371	898.56	2.42199460916442	621.12
965	W00480	SOUTHERN WATER	226	544.32	2.40849557522124	1097.76
966	W00540	SOUTHERN WATER	398	950.4	2.38793969849246	960.32
967	W00539	SOUTHERN WATER	105	639.36	6.08914285714286	57.87
968	A00531	SOUTHERN WATER	1020	2479.68	2.43105882352941	424.12
969	W00026	SOUTHERN WATER	130	544.32	4.18707692307692	283.83
970	W00527	SOUTHERN WATER	1465	7948.8	5.42580204778157	0
971	W00501	SOUTHERN WATER	120	639.36	5.328	453.24
972	W00559	SOUTHERN WATER	1000	3991.68	3.99168	0
973	A00720	SOUTHERN WATER	44582	70243.2	1.57559553182899	349.69
974	W00549	SOUTHERN WATER	206	501.12	2.4326213592233	1359.94
975	W00546	SOUTHERN WATER	1696	4147.2	2.44528301886792	561.66
976	W00518	SOUTHERN WATER	11800	22723.2	1.92569491525424	299.7
977	W00508	SOUTHERN WATER	244	1503.36	6.16131147540984	588.17
978	W00510	SOUTHERN WATER	6850	19612.8	2.86318248175183	9.98
979	W00486	SOUTHERN WATER	175	976.32	5.57897142857143	1141.29
980	A00623	SOUTHERN WATER	21435	NA	NA	0
981	W00541	SOUTHERN WATER	1700	3542.4	2.08376470588235	468.17
982	W00556	SOUTHERN WATER	370	898.56	2.42854054054054	570.15
983	W00003	SOUTHERN WATER	154	371.52	2.41246753246753	482.29
984	W00134	SOUTHERN WATER	80	NA	NA	55.23
985	W00507	SOUTHERN WATER	293	NA	NA	53.97
986	A01183	SOUTHERN WATER	825	2073.6	2.51345454545455	774.85
987	W00385	SOUTHERN WATER	227	1382.4	6.08986784140969	252.24
988	W00133	SOUTHERN WATER	1221	3628.8	2.97199017199017	484.12
989	A00190	SOUTHERN WATER	338	1036.8	3.06745562130178	629
990	W00362	SOUTHERN WATER	623	1797.12	2.8846227929374	498.5
991	W00361	SOUTHERN WATER	235	457.92	1.94859574468085	364.96
992	W00537	SOUTHERN WATER	197	1408.32	7.14883248730965	115.05
993	W00360	SOUTHERN WATER	193	578.88	2.99937823834197	0
994	W00555	SOUTHERN WATER	150	362.88	2.4192	731.89
995	A00526	SOUTHERN WATER	1445	4579.2	3.16899653979239	566.14
996	W00122	SOUTHERN WATER	525	2609.28	4.97005714285714	24.58
997	W00607	SOUTHERN WATER	484	604.8	1.2495867768595	1093.86
998	W00356	SOUTHERN WATER	367	889.92	2.42485013623978	397.2
999	W00367	SOUTHERN WATER	132	319.68	2.42181818181818	1182.7
1000	W00340	SOUTHERN WATER	300	820.8	2.736	1678.38
1001	W00336	SOUTHERN WATER	188	1123.2	5.97446808510638	123.23
1002	W00137	SOUTHERN WATER	13524	25920	1.91659272404614	1501.1
1003	W00521	SOUTHERN WATER	188	204.768	1.0891914893617	45.02
1004	W00329	SOUTHERN WATER	340	1019.52	2.99858823529412	21.12
1005	W00041	SOUTHERN WATER	1508	3024	2.0053050397878	113.63
1006	W00406	SOUTHERN WATER	1115	2626.56	2.35565919282511	578.7
1007	W00352	SOUTHERN WATER	850	1641.6	1.93129411764706	322.67
1008	W00019	SOUTHERN WATER	133	328.32	2.46857142857143	250.46
1009	A00576	SOUTHERN WATER	9917	26395.2	2.66161137440758	573.07
1010	A00787	SOUTHERN WATER	37764	NA	NA	6.52
1011	A00567	SOUTHERN WATER	183	190.08	1.03868852459016	1905.69
1012	W00120	SOUTHERN WATER	235	898.56	3.82365957446809	306.01
1013	W00015	SOUTHERN WATER	1141	2073.6	1.81735319894829	601.98
1014	A00192	SOUTHERN WATER	250	NA	NA	1395.65
1015	A00532	SOUTHERN WATER	3000	12614.4	4.2048	60.97
1016	W00380	SOUTHERN WATER	59	276.48	4.68610169491525	71.17
1017	W00359	SOUTHERN WATER	1696	2937.6	1.73207547169811	4996
1018	W00342	SOUTHERN WATER	359	572.832	1.59563231197772	33.16
1019	A00755	SOUTHERN WATER	14027	29721.6	2.11888500748556	325.89
1020	W00364	SOUTHERN WATER	140	302.4	2.16	737.55
1021	W00069	SOUTHERN WATER	41	285.12	6.95414634146341	76.72
1022	W00358	SOUTHERN WATER	1182	NA	NA	63.61
1023	W00115	SOUTHERN WATER	196	682.56	3.48244897959184	213.11
1024	A01192	SOUTHERN WATER	2309	5097.6	2.20770896491988	567.99
1025	W00479	SOUTHERN WATER	5802	16123.968	2.77903619441572	821.23
1026	A00697	SOUTHERN WATER	11225	21772.8	1.93967037861915	502.22
1027	W00470	SOUTHERN WATER	574	NA	NA	706.11
1028	W00513	SOUTHERN WATER	434	1814.4	4.18064516129032	967.62
1029	A00195	SOUTHERN WATER	579	1468.8	2.53678756476684	574.11
1030	A01105	SOUTHERN WATER	10714	NA	NA	180.18
1031	W00400	SOUTHERN WATER	288	578.88	2.01	322.53
1032	W00398	SOUTHERN WATER	181	NA	NA	550.67
1033	W00338	SOUTHERN WATER	55	NA	NA	3.13
1034	W00037	SOUTHERN WATER	911	3896.64	4.27732162458836	306.84
1035	W00600	SOUTHERN WATER	638	993.6	1.55736677115987	3406.48
1036	W00390	SOUTHERN WATER	2500	6393.6	2.55744	155.47
1037	W00013	SOUTHERN WATER	2986	8985.6	3.00924313462827	572.94
1038	W00020	SOUTHERN WATER	453	1105.92	2.44132450331126	154.19
1039	A01171	SOUTHERN WATER	1728	4060.8	2.35	41.31
1040	W00553	SOUTHERN WATER	136	408.672	3.00494117647059	1103.4
1041	W00354	SOUTHERN WATER	6565	NA	NA	271.05
1042	W00504	SOUTHERN WATER	362	1321.92	3.65171270718232	682.24
1043	CATM.2969	SOUTHERN WATER	10886	24278.4	2.23024067609774	235.26
1044	CSSC.0411	SOUTHERN WATER	9300	27907.2	3.00077419354839	100.15
1045	S/22/23032/SG	THAMES WATER	NA	NA	NA	9.367777716
1046	CAWM.1403	THAMES WATER	83	311.04	3.74746987951807	16.83
1047	CATM.3093	THAMES WATER	162	354.24	2.18666666666667	733.85
1048	CTCR.1722	THAMES WATER	382	NA	NA	459.12
1049	CATM.3092	THAMES WATER	1855	3456	1.86307277628032	53.76
1050	CTCR.1749	THAMES WATER	4000	NA	NA	383.57
1051	CTCR.1767	THAMES WATER	2000	5529.6	2.7648	441.41
1052	CATM.3132	THAMES WATER	NA	NA	NA	1110.21
1053	CSSC.2351	THAMES WATER	280	NA	NA	73.85
1054	CTCR.1189	THAMES WATER	1211	NA	NA	1357.96
1055	CTCR.2011	THAMES WATER	633	NA	NA	244.39
1056	CSSC.2346	THAMES WATER	NA	NA	NA	865.32
1057	CAWM.0192	THAMES WATER	251	NA	NA	0.46
1058	CTCR.1531	THAMES WATER	30	NA	NA	101.89
1059	CATM.2488	THAMES WATER	667	NA	NA	1281.03
1060	CSSC.1445	THAMES WATER	242	NA	NA	511.92
1061	CATM.3095	THAMES WATER	317	950.4	2.9981072555205	242.81
1062	CLCR.0097	THAMES WATER	244	NA	NA	735.9
1063	CATM.3133	THAMES WATER	11883	NA	NA	934.91
1064	CSSC.2328	THAMES WATER	2319	NA	NA	697.48
1065	CSSC.2453	THAMES WATER	2559	NA	NA	1269.73
1066	CNTD.0020	THAMES WATER	4671	12700.8	2.71907514450867	89.7
1067	CTCR.1804	THAMES WATER	8335	23500.8	2.81953209358128	380.95
1068	CNTD.0054	THAMES WATER	243	NA	NA	805.49
1069	CSSC.2452	THAMES WATER	458	1339.2	2.92401746724891	1168.53
1070	CSSA.0360	THAMES WATER	1344000	2335991.616	1.738089	1028.2
1071	CATM.3074	THAMES WATER	11504	NA	NA	3770.12
1072	CNTW.0359	THAMES WATER	168	354.24	2.10857142857143	1754.01
1073	CTCR.1645	THAMES WATER	8790	20217.6	2.30006825938567	228.81
1074	CTCR.2048	THAMES WATER	7667	13564.8	1.76924481544281	170.06
1075	CNTD.0039	THAMES WATER	6134	NA	NA	78.14
1076	CSSC.0315	THAMES WATER	26775	NA	NA	234.95
1077	CNTD.0021	THAMES WATER	20394	NA	NA	0
1078	CTCR.0875	THAMES WATER	NA	64998.72	NA	8.15
1079	CNTD.0023	THAMES WATER	13724	NA	NA	555.78
1080	CSSC.0328	THAMES WATER	9000	19872	2.208	578.15
1081	CSSC.2455	THAMES WATER	896	3283.2	3.66428571428571	804.39
1082	CTCR.1205	THAMES WATER	19529	NA	NA	1123.72
1083	CNTD.0040	THAMES WATER	71	164.16	2.31211267605634	541.6
1084	CLCP.0173	THAMES WATER	59	138.24	2.34305084745763	868.6
1085	CSSC.8551	THAMES WATER	900	2764.8	3.072	73.7
1086	CTCR.1793	THAMES WATER	765	1382.4	1.80705882352941	607.01
1087	CSSC.2466	THAMES WATER	25	241.92	9.6768	1000.99
1088	CTCR.1750	THAMES WATER	13333	23241.6	1.74316357908948	1216.07
1089	CTCR.1991	THAMES WATER	NA	NA	NA	1139.87
1090	CSSC.1038	THAMES WATER	139	267.84	1.92690647482014	1346.35
1091	CNTD.0082	THAMES WATER	14450	NA	NA	1814.05
1092	CNTD.0068	THAMES WATER	800	NA	NA	12.27
1093	CTCR.1340	THAMES WATER	27842	NA	NA	341.66
1094	CSSA.0362	THAMES WATER	597000	1117991.808	1.87268309547739	531.89
1095	CNTD.0072	THAMES WATER	232656	496751.616	2.13513348462967	183.54
1096	CTCR.1772	THAMES WATER	8177	NA	NA	612.54
1097	CNTD.0032	THAMES WATER	2492	6220.8	2.49630818619583	1424.02
1098	CNTD.0078	THAMES WATER	221	501.12	2.26751131221719	265.27
1099	CTCU.0375	THAMES WATER	72	368.928	5.124	360.27
1100	CATM.3651	THAMES WATER	11476	28598.4	2.49201812478215	739.49
1101	CNTD.0044	THAMES WATER	35200	NA	NA	675.48
1102	CSSC.1369	THAMES WATER	84	155.52	1.85142857142857	1206.11
1103	CNTD.0069	THAMES WATER	13300	NA	NA	208.97
1104	CLCR.0087	THAMES WATER	4694	NA	NA	3.63
1105	CSSC.2343	THAMES WATER	2812	NA	NA	131.93
1106	CSSC.2350	THAMES WATER	274	NA	NA	10.77
1107	CNTD.0055	THAMES WATER	13500	NA	NA	744.07
1108	CTCR.1203	THAMES WATER	4296	10834.56	2.52201117318436	920.2
1109	CASM.0040	THAMES WATER	68905	NA	NA	95.38
1110	CNTD.0046	THAMES WATER	1066	1719.36	1.61290806754221	11
1111	CTCR.1084	THAMES WATER	26254	NA	NA	98.25
1112	CLCP.0131	THAMES WATER	6833	NA	NA	120.49
1113	CSSC.0261	THAMES WATER	811	2160	2.66337854500617	2602.85
1114	CSSC.2335	THAMES WATER	NA	3651.264	NA	27.47
1115	CNTW.0659	THAMES WATER	8749	NA	NA	15.95
1116	CSSC.1381	THAMES WATER	36	103.68	2.88	631.93
1117	CNTD.0061	THAMES WATER	2950	NA	NA	143.56
1118	CNTD.0079	THAMES WATER	4800	8208	1.71	162.89
1119	CNTD.0067	THAMES WATER	186000	337996.8	1.81718709677419	418.8
1120	CSSC.1400	THAMES WATER	137	578.88	4.22540145985402	0
1121	CTCR.1780	THAMES WATER	14217	21600	1.51930787085883	795.76
1122	CNTD.0084	THAMES WATER	44418	NA	NA	23.61
1123	CNTD.0085	THAMES WATER	559000	1064016	1.90342754919499	438.3
1124	CSSC.1406	THAMES WATER	NA	354.24	NA	317.77
1125	CNTD.0035	THAMES WATER	21000	NA	NA	1.15
1126	CNTD.0083	THAMES WATER	9622	NA	NA	1119.37
1127	CSSC.0263	THAMES WATER	540	1002.24	1.856	969.55
1128	CNTD.0010	THAMES WATER	83	293.76	3.53927710843373	78.1
1129	CNTD.0012	THAMES WATER	325	898.56	2.7648	445.74
1130	CNTD.0037	THAMES WATER	6275	10800	1.72111553784861	138.6
1131	CTCR.0709	THAMES WATER	50985	NA	NA	891.52
1132	CSSC.2353	THAMES WATER	1357	2332.8	1.71908621960206	0
1133	CTCA.2077	THAMES WATER	2333	NA	NA	332.23
1134	CAWM.0942	THAMES WATER	NA	135993.6	NA	50.11
1135	CASM.0827	THAMES WATER	13334	29376	2.20308984550773	1777.6
1136	CNTD.0015	THAMES WATER	1650	NA	NA	3.71
1137	CTCR.2150	THAMES WATER	8296	12999.744	1.5669893924783	155.85
1138	CSSC.1419	THAMES WATER	18	129.6	7.2	136.2
1139	CNTW.0737	THAMES WATER	8000	NA	NA	968.32
1140	CNTM.2237	THAMES WATER	52609	NA	NA	172.65
1141	CNTD.0017	THAMES WATER	48275	122947.2	2.54680890730192	231.66
1142	CTCR.0742	THAMES WATER	102	233.28	2.28705882352941	1321.69
1143	CSSC.1425	THAMES WATER	23	112.32	4.88347826086957	519.75
1144	CSSC.1434	THAMES WATER	566	1468.8	2.59505300353357	902.85
1145	CLCR.0165	THAMES WATER	2650	NA	NA	383.07
1146	CTCR.2063	THAMES WATER	3167	NA	NA	11.54
1147	CTCR.1158	THAMES WATER	2792	7494.336	2.68421776504298	320.78
1148	CLCR.0090	THAMES WATER	710	1569.024	2.20989295774648	67.39
1149	CSSC.2320	THAMES WATER	538	760.32	1.41323420074349	1237.59
1150	CTCR.0944	THAMES WATER	10303	10022.4	0.972765214015335	314.56
1151	CNTD.0086	THAMES WATER	7700	NA	NA	484.61
1152	CNTD.0053	THAMES WATER	6250	NA	NA	155.2
1153	CTCR.2079	THAMES WATER	30000	89994.24	2.999808	108.26
1154	017570082	UNITED UTILITIES	85	518.4	6.09882352941177	360.6
1155	017670046	UNITED UTILITIES	59.5	364.608	6.12786554621849	162.8
1156	016930486	UNITED UTILITIES	3300	12182.4	3.69163636363636	658.61
1157	016910001	UNITED UTILITIES	5310	10195.2	1.92	1992.42
1158	017580272	UNITED UTILITIES	232	864	3.72413793103448	160.44
1159	017470136	UNITED UTILITIES	1036	3888	3.75289575289575	4908.83
1160	017670054	UNITED UTILITIES	38	317.952	8.36715789473684	108.5
1161	017670001	UNITED UTILITIES	1180	2566.08	2.17464406779661	117.84
1162	017570063	UNITED UTILITIES	898	2729.376	3.03939420935412	937.89
1163	016810045	UNITED UTILITIES	2047	6393.6	3.12340009770396	668.06
1164	017670078	UNITED UTILITIES	56	326.592	5.832	1177.2
1165	017470166	UNITED UTILITIES	27500	59443.2	2.16157090909091	959.92
1166	017260043	UNITED UTILITIES	1357	3196.8	2.35578481945468	2109.37
1167	016950031	UNITED UTILITIES	90	5443.2	60.48	841.83
1168	016810052	UNITED UTILITIES	4700	13392	2.84936170212766	241.27
1169	017160024	UNITED UTILITIES	72000	233280	3.24	1157.4
1170	016993399	UNITED UTILITIES	55200	74304	1.34608695652174	4136.87
1171	017570023	UNITED UTILITIES	69	423.36	6.13565217391304	1179.93
1172	017670002	UNITED UTILITIES	108	624.672	5.784	381.03
1173	017570065	UNITED UTILITIES	144	86.4	0.6	1032.85
1174	017470043	UNITED UTILITIES	70	746.496	10.6642285714286	278.84
1175	016950032	UNITED UTILITIES	101000	241920	2.39524752475248	1924.17
1176	017570066	UNITED UTILITIES	106	656.64	6.19471698113208	829.5
1177	016940002	UNITED UTILITIES	2360	5019.84	2.12705084745763	2008.79
1178	017470152	UNITED UTILITIES	3384	6998.4	2.06808510638298	679.01
1179	017570026	UNITED UTILITIES	54	259.2	4.8	92.96
1180	016892175	UNITED UTILITIES	5	31.104	6.2208	46.02
1181	016810057	UNITED UTILITIES	NA	432	NA	444.07
1182	017670004	UNITED UTILITIES	276	369.792	1.33982608695652	2779.63
1183	017570067	UNITED UTILITIES	7	43.2	6.17142857142857	113.49
1184	017030001	UNITED UTILITIES	8070	35510.4	4.40029739776952	292.78
1185	016950033	UNITED UTILITIES	82200	203904	2.48058394160584	3844.87
1186	017260021	UNITED UTILITIES	190	432	2.27368421052632	550.25
1187	017670113	UNITED UTILITIES	NA	648	NA	861.4
1188	017570030	UNITED UTILITIES	25.82	40.608	1.5727343144849	2.07
1189	017670194	UNITED UTILITIES	80	561.6	7.02	3503.37
1190	017370081	UNITED UTILITIES	5260	27648	5.25627376425856	3.98
1191	017270014	UNITED UTILITIES	80	202.176	2.5272	52.8
1192	017670049	UNITED UTILITIES	30749	104976	3.41396468177827	250.61
1193	017670090	UNITED UTILITIES	84	533.952	6.35657142857143	8.77
1194	016950034	UNITED UTILITIES	1465	4078.08	2.78367235494881	1082.09
1195	016940168	UNITED UTILITIES	2230	5097.6	2.28591928251121	373.63
1196	017060016	UNITED UTILITIES	17150	80006.4	4.66509620991254	2313.46
1197	EPREP3526XK	UNITED UTILITIES	393	1814.4	4.61679389312977	36.89
1198	017470025	UNITED UTILITIES	5600	14515.2	2.592	941.47
1199	017160033	UNITED UTILITIES	7340	18541.44	2.52608174386921	1510.85
1200	017570031	UNITED UTILITIES	4745	8095.68	1.70614963119073	2378.89
1201	017160006	UNITED UTILITIES	7174	18316.8	2.55321996097017	4127.5
1202	017370035	UNITED UTILITIES	542	1632.96	3.01284132841328	2710.23
1203	EPRFP3828GS	UNITED UTILITIES	151	915.84	6.06516556291391	0
1204	017670051	UNITED UTILITIES	82	171.072	2.08624390243902	394.91
1205	016810068	UNITED UTILITIES	23300	70156.8	3.01102145922747	1981.63
1206	017670005	UNITED UTILITIES	20	114.912	5.7456	4163.82
1207	017570086	UNITED UTILITIES	215	1321.92	6.14846511627907	562.47
1208	017060017	UNITED UTILITIES	4950	12700.8	2.56581818181818	1484.43
1209	016940143	UNITED UTILITIES	340000	714009.6	2.10002823529412	1733.2
1210	017160025	UNITED UTILITIES	22200	36028.8	1.62291891891892	1875.41
1211	017570035	UNITED UTILITIES	77	864	11.2207792207792	121.62
1212	017570037	UNITED UTILITIES	231	604.8	2.61818181818182	2761.29
1213	017570038	UNITED UTILITIES	72	68.256	0.948	4099.48
1214	016930112	UNITED UTILITIES	42000	139968	3.33257142857143	11.63
1215	017280252	UNITED UTILITIES	101237	198720	1.96291869573377	355.17
1216	016930108	UNITED UTILITIES	7700	17280	2.24415584415584	981.47
1217	017570069	UNITED UTILITIES	141	81.216	0.576	3334.52
1218	017160034	UNITED UTILITIES	461	1360.8	2.95184381778742	864.8
1219	017370128	UNITED UTILITIES	3462	10886.4	3.14454072790295	141.28
1220	017680367	UNITED UTILITIES	75	604.8	8.064	83.74
1221	017470040	UNITED UTILITIES	450	1961.28	4.3584	643.86
1222	017680364	UNITED UTILITIES	124	597.024	4.81470967741935	432.7
1223	017160035	UNITED UTILITIES	134	323.136	2.41146268656716	1505.3
1224	017670101	UNITED UTILITIES	183	276.48	1.51081967213115	267.49
1225	016940174	UNITED UTILITIES	1000	2540.16	2.54016	632.07
1226	017160036	UNITED UTILITIES	333	777.6	2.33513513513514	1812.53
1227	017030023	UNITED UTILITIES	1382	5529.6	4.00115774240232	143.62
1228	017670062	UNITED UTILITIES	108	950.4	8.8	262.34
1229	016810187	UNITED UTILITIES	6650	20044.8	3.01425563909774	115.33
1230	016930111	UNITED UTILITIES	16700	43804.8	2.62304191616767	694.77
1231	017050012	UNITED UTILITIES	11500	33004.8	2.86998260869565	1246.04
1232	016930121	UNITED UTILITIES	15660	37929.6	2.42206896551724	1584.82
1233	017470188	UNITED UTILITIES	48	171.936	3.582	606.9
1234	017160008	UNITED UTILITIES	74900	149990.4	2.00254205607477	965.33
1235	017670011	UNITED UTILITIES	13	77.76	5.98153846153846	405.79
1236	017370100	UNITED UTILITIES	16000	41990.4	2.6244	613.57
1237	016940133	UNITED UTILITIES	3630	11232	3.09421487603306	2672.47
1238	017270050	UNITED UTILITIES	38731	93830.4	2.42261754150422	846.71
1239	017670013	UNITED UTILITIES	1096	1814.4	1.65547445255474	2431.59
1240	017670066	UNITED UTILITIES	397.4	950.4	2.39154504277806	1430.03
1241	017060018	UNITED UTILITIES	10940	28598.4	2.61411334552102	0
1242	017370073	UNITED UTILITIES	763	1036.8	1.35884665792923	947.62
1243	016993397	UNITED UTILITIES	234000	346291.2	1.47987692307692	600.07
1244	017160041	UNITED UTILITIES	201	1054.08	5.24417910447761	1456.73
1245	017060019	UNITED UTILITIES	3242	7776	2.39851943244911	559.4
1246	017270051	UNITED UTILITIES	1359	10022.4	7.37483443708609	34.76
1247	017470048	UNITED UTILITIES	2799	8640	3.08681672025723	0.98
1248	016910010	UNITED UTILITIES	935	2695.68	2.88308021390374	2635.97
1249	017680532	UNITED UTILITIES	23	146.88	6.38608695652174	332.16
1250	017670019	UNITED UTILITIES	72	293.76	4.08	1875.25
1251	016810097	UNITED UTILITIES	5180	10540.8	2.03490347490348	436.28
1252	017370074	UNITED UTILITIES	173	418.176	2.41720231213873	1031.22
1253	017370051	UNITED UTILITIES	710	3024	4.25915492957746	3877.88
1254	016810099	UNITED UTILITIES	19820	41644.8	2.10115035317861	1351.93
1255	016993400	UNITED UTILITIES	16638	35424	2.12910205553552	1619.87
1256	017370075	UNITED UTILITIES	208	452.736	2.17661538461538	2036.05
1257	017670084	UNITED UTILITIES	6989	15603.84	2.23262841608242	743.58
1258	017570072	UNITED UTILITIES	128	148.608	1.161	5033.48
1259	017670110	UNITED UTILITIES	83	499.392	6.01677108433735	186.29
1260	017670085	UNITED UTILITIES	1070	1069.632	0.999656074766355	313.13
1261	017260071	UNITED UTILITIES	2333	6998.4	2.99974282040291	885.2
1262	017160064	UNITED UTILITIES	79600	233971.2	2.93933668341709	1180.63
1263	017570073	UNITED UTILITIES	120	864	7.2	659.75
1264	017160043	UNITED UTILITIES	323	2289.6	7.08854489164087	5016.45
1265	017670129	UNITED UTILITIES	52	179.712	3.456	446.83
1266	016950041	UNITED UTILITIES	60533	116985.6	1.93259213982456	1981.97
1267	016950042	UNITED UTILITIES	25000	63158.4	2.526336	1190.18
1268	016820127	UNITED UTILITIES	17749	54000	3.04242492534791	935.32
1269	016940150	UNITED UTILITIES	50000	34992	0.69984	2019.87
1270	017680300	UNITED UTILITIES	32	198.72	6.21	711.47
1271	016810105	UNITED UTILITIES	98	518.4	5.28979591836735	567.51
1272	016940090	UNITED UTILITIES	7000	18662.4	2.66605714285714	2037.17
1273	016810106	UNITED UTILITIES	5352	13046.4	2.43766816143498	908.93
1274	017480324	UNITED UTILITIES	838	4147.2	4.94892601431981	1507.79
1275	017020107	UNITED UTILITIES	16620	69033.6	4.15364620938628	514.51
1276	017570006	UNITED UTILITIES	880	4544.64	5.16436363636364	81.14
1277	017160045	UNITED UTILITIES	3400	6825.6	2.00752941176471	785.45
1278	017160046	UNITED UTILITIES	29	326.592	11.2617931034483	459.7
1279	017670087	UNITED UTILITIES	55	1189.728	21.6314181818182	714.65
1280	017030100	UNITED UTILITIES	37900	76032	2.00612137203166	733.03
1281	017470020	UNITED UTILITIES	1112	2764.8	2.4863309352518	634.33
1282	016920130	UNITED UTILITIES	47670	127008	2.66431718061674	1422.68
1283	016940151	UNITED UTILITIES	45731	159926.4	3.49711136865584	1425.48
1284	016940152	UNITED UTILITIES	10076	24451.2	2.42667725287813	1230.88
1285	017570056	UNITED UTILITIES	30	30.24	1.008	331.6
1286	017370061	UNITED UTILITIES	754	1114.56	1.47819628647215	1171.79
1287	016810110	UNITED UTILITIES	864	2160	2.5	1003.11
1288	017570074	UNITED UTILITIES	8.99	26.784	2.97931034482759	283.03
1289	017370179	UNITED UTILITIES	9315	36288	3.89565217391304	20.22
1290	016940154	UNITED UTILITIES	8097	23846.4	2.94509077436087	3101.65
1291	017160048	UNITED UTILITIES	240	604.8	2.52	3814.62
1292	017260056	UNITED UTILITIES	122	296.352	2.42911475409836	480.37
1293	017030014	UNITED UTILITIES	521	1183.68	2.27193857965451	293.92
1294	017570085	UNITED UTILITIES	60	483.84	8.064	678.22
1295	017670075	UNITED UTILITIES	458	2809.728	6.13477729257642	96.53
1296	016810114	UNITED UTILITIES	30	142.56	4.752	0
1297	017480351	UNITED UTILITIES	11057	12096	1.0939676223207	218.16
1298	017081316	UNITED UTILITIES	75600	167011.2	2.20914285714286	726.95
1299	017570019	UNITED UTILITIES	2515	4907.52	1.95130019880716	671.35
1300	016810116	UNITED UTILITIES	NA	28339.2	NA	232.35
1301	017680463	UNITED UTILITIES	13	77.76	5.98153846153846	0
1302	017270020	UNITED UTILITIES	68	406.08	5.97176470588235	312.64
1303	016810119	UNITED UTILITIES	734	5728.32	7.80425068119891	88.13
1304	017160028	UNITED UTILITIES	6880	23328	3.3906976744186	154.71
1305	017260046	UNITED UTILITIES	3550	12787.2	3.60202816901408	1024.68
1306	101966	WESSEX WATER	13	73.44	5.64923076923077	0
1307	040001	WESSEX WATER	300	812.16	2.7072	30.5
1308	401518	WESSEX WATER	1811	5443.2	3.00563224737714	0
1309	102443	WESSEX WATER	275	1503.36	5.46676363636364	0
1310	041560	WESSEX WATER	83	250.56	3.01879518072289	578.6
1311	042451	WESSEX WATER	1200	4406.4	3.672	19
1312	010528	WESSEX WATER	580	1728	2.97931034482759	779.9
1313	102272	WESSEX WATER	27000	50112	1.856	656.8
1314	401961	WESSEX WATER	52	319.68	6.14769230769231	207.5
1315	040010	WESSEX WATER	325	587.52	1.80775384615385	1729.9
1316	102190	WESSEX WATER	3013	9936	3.29770992366412	164.1
1317	043204	WESSEX WATER	83	475.2	5.72530120481928	1852.8
1318	102712	WESSEX WATER	1750	11059.2	6.31954285714286	2.4
1319	102735	WESSEX WATER	2182	6255.36	2.86680109990834	200.1
1320	400673	WESSEX WATER	8050	14601.6	1.81386335403727	183.7
1321	102815	WESSEX WATER	32	190.08	5.94	89
1322	101442	WESSEX WATER	510	3965.76	7.776	464
1323	040725	WESSEX WATER	425	1088.64	2.56150588235294	476.5
1324	102409	WESSEX WATER	800	2246.4	2.808	55.1
1325	101327	WESSEX WATER	5079	12960	2.55168340224454	331
1326	102536	WESSEX WATER	1700	10497.6	6.17505882352941	1.8
1327	401625	WESSEX WATER	1270	3024	2.38110236220472	123.4
1328	401068	WESSEX WATER	290	864	2.97931034482759	700
1329	102218	WESSEX WATER	423	1296	3.06382978723404	161.6
1330	102937	WESSEX WATER	3200	4864.32	1.5201	2444.8
1331	101637	WESSEX WATER	10000	22982.4	2.29824	351
1332	401355	WESSEX WATER	20270	42336	2.08860384805131	314.6
1333	102713	WESSEX WATER	663	1581.12	2.3847963800905	4.8
1334	040022	WESSEX WATER	1800	4492.8	2.496	186.1
1335	103843	WESSEX WATER	300	1036.8	3.456	15.5
1336	041324	WESSEX WATER	285	1036.8	3.63789473684211	184.5
1337	040023	WESSEX WATER	250	786.24	3.14496	2326
1338	101456	WESSEX WATER	2481	5529.6	2.22877871825877	102.1
1339	102219	WESSEX WATER	95	518.4	5.45684210526316	169
1340	102172	WESSEX WATER	2200	7516.8	3.41672727272727	97.5
1341	102510	WESSEX WATER	170	397.44	2.33788235294118	745.5
1342	102408	WESSEX WATER	144	414.72	2.88	775.8
1343	102390	WESSEX WATER	80	362.88	4.536	77.4
1344	102816	WESSEX WATER	87	397.44	4.56827586206897	1044.8
1345	102152	WESSEX WATER	1586	3801.6	2.39697351828499	247.5
1346	401050	WESSEX WATER	9450	16848	1.78285714285714	88.8
1347	041354	WESSEX WATER	1216	3646.08	2.99842105263158	468
1348	042453	WESSEX WATER	146	293.76	2.01205479452055	330.8
1349	102858	WESSEX WATER	285	864	3.03157894736842	434.5
1350	401739	WESSEX WATER	2184	6566.4	3.00659340659341	460.5
1351	401342	WESSEX WATER	2751	6842.88	2.48741548527808	400
1352	401338	WESSEX WATER	345	915.84	2.65460869565217	840.3
1353	102222	WESSEX WATER	8250	34992	4.24145454545455	64.5
1354	101431	WESSEX WATER	5200	13824	2.65846153846154	670.2
1355	102840	WESSEX WATER	177	518.4	2.92881355932203	588.5
1356	402509	WESSEX WATER	56	518.4	9.25714285714286	0
1357	041799	WESSEX WATER	791	1529.28	1.93335018963338	0
1358	NPSWQD000307	WESSEX WATER	627	1753.92	2.79732057416268	51.8
1359	401065	WESSEX WATER	55000	123033.6	2.23697454545455	44.4
1360	102389	WESSEX WATER	383	950.4	2.48146214099217	672.1
1361	402489	WESSEX WATER	110	501.12	4.55563636363636	96.8
1362	402465	WESSEX WATER	75	630.72	8.4096	29.7
1363	040044	WESSEX WATER	2034	3360.96	1.65238938053097	3890
1364	101879	WESSEX WATER	450	950.4	2.112	144.3
1365	401089	WESSEX WATER	347	1080	3.11239193083573	1484.2
1366	401495	WESSEX WATER	10600	31968	3.01584905660377	38.4
1367	102395	WESSEX WATER	2500	6739.2	2.69568	527.5
1368	102362	WESSEX WATER	3200	13478.4	4.212	1054.5
1369	040047	WESSEX WATER	24	69.12	2.88	162.3
1370	102917	WESSEX WATER	312	639.36	2.04923076923077	276.8
1371	101620	WESSEX WATER	311	1555.2	5.00064308681672	145.9
1372	040862	WESSEX WATER	34	190.08	5.59058823529412	344
1373	102361	WESSEX WATER	3168	7482.24	2.36181818181818	335.7
1374	401242	WESSEX WATER	1600	4795.2	2.997	169.5
1375	400608	WESSEX WATER	57	190.08	3.33473684210526	2
1376	041353	WESSEX WATER	318	950.4	2.98867924528302	724.5
1377	040628	WESSEX WATER	1163	3456	2.97162510748065	1345.9
1378	040059	WESSEX WATER	720	2125.44	2.952	198.6
1379	042116	WESSEX WATER	423	3196.8	7.55744680851064	1196.4
1380	102728	WESSEX WATER	292	1036.8	3.55068493150685	15.5
1381	101886	WESSEX WATER	5000	15033.6	3.00672	302
1382	102195	WESSEX WATER	900	3542.4	3.936	85.6
1383	102289	WESSEX WATER	1184	3024	2.55405405405405	524.8
1384	401861	WESSEX WATER	12	103.68	8.64	0
1385	102162	WESSEX WATER	815	2306.88	2.83052760736196	88.3
1386	101640	WESSEX WATER	780	2678.4	3.43384615384615	233.8
1387	102410	WESSEX WATER	205	475.2	2.31804878048781	890.4
1388	103453	WESSEX WATER	334	872.64	2.61269461077844	545.8
1389	042464	WESSEX WATER	1596	4389.12	2.75007518796992	29.7
1390	040067	WESSEX WATER	295	NA	NA	422.75
1391	401485	WESSEX WATER	18630	39052.8	2.09623188405797	0
1392	102988	WESSEX WATER	2252	6246.72	2.77385435168739	1581.5
1393	401500	WESSEX WATER	4546	9737.28	2.141944566652	0
1394	401354	WESSEX WATER	47700	105408	2.20981132075472	51.4
1395	102630	WESSEX WATER	5984	14083.2	2.35347593582888	289.4
1396	042618	WESSEX WATER	435	1209.6	2.78068965517241	504
1397	402536	WESSEX WATER	4564	11404.8	2.4988606485539	328.2
1398	101462	WESSEX WATER	1205	2721.6	2.25858921161826	38.9
1399	102715	WESSEX WATER	207	622.08	3.00521739130435	275.5
1400	101543	WESSEX WATER	3750	10368	2.7648	426.8
1401	401738	WESSEX WATER	33	NA	NA	0
1402	401382	WESSEX WATER	23500	42508.8	1.80888510638298	166
1403	401340	WESSEX WATER	751	1684.8	2.24340878828229	16.5
1404	040080	WESSEX WATER	480	2419.2	5.04	4269
1405	102511	WESSEX WATER	1747	4492.8	2.5717229536348	15.5
1406	401758	WESSEX WATER	2944	7603.2	2.58260869565217	20.9
1407	103392	WESSEX WATER	2000	6998.4	3.4992	530.6
1408	101438	WESSEX WATER	285	829.44	2.91031578947368	75.5
1409	102818	WESSEX WATER	1200	4199.04	3.4992	841.7
1410	NPSWQD008026	WESSEX WATER	1014	3369.6	3.32307692307692	74.4
1411	400435	WESSEX WATER	4910	NA	NA	69.5
1412	401025	WESSEX WATER	86	578.88	6.73116279069768	2041.4
1413	040095	WESSEX WATER	925	NA	NA	39.1
1414	101480	WESSEX WATER	505	1261.44	2.49790099009901	1008.5
1415	102257	WESSEX WATER	30595	NA	NA	336.7
1416	040093	WESSEX WATER	140	950.4	6.78857142857143	9.7
1417	102328	WESSEX WATER	3750	11232	2.9952	344.6
1418	400607	WESSEX WATER	77	348.192	4.52197402597403	164.8
1419	102153	WESSEX WATER	14000	74044.8	5.28891428571429	66.1
1420	101432	WESSEX WATER	5700	15638.4	2.74357894736842	10.9
1421	401336	WESSEX WATER	2502	8337.6	3.33237410071942	22.8
1422	101940	WESSEX WATER	3081	8640	2.80428432327166	65.5
1423	101652	WESSEX WATER	6871	10368	1.50895066220346	0.7
1424	402466	WESSEX WATER	5500	12182.4	2.21498181818182	55.5
1425	101332	WESSEX WATER	3750	13219.2	3.52512	0.3
1426	400972	WESSEX WATER	5600	16761.6	2.99314285714286	6.8
1427	102050	WESSEX WATER	318	1183.68	3.7222641509434	841.5
1428	400622	WESSEX WATER	32141	77760	2.41933978407641	226.8
1429	401747	WESSEX WATER	2205	NA	NA	64.2
1430	102716	WESSEX WATER	325	881.28	2.71163076923077	353
1431	102350	WESSEX WATER	4612	12009.6	2.60398959236774	1105.9
1432	401609	WESSEX WATER	1800	6048	3.36	16.3
1433	102486	WESSEX WATER	1182	2764.8	2.33908629441624	14.2
1434	400606	WESSEX WATER	64	383.616	5.994	10.3
1435	101331	WESSEX WATER	14305	34300.8	2.39781894442503	152
1436	102049	WESSEX WATER	677	2419.2	3.57341211225997	120.5
1437	010002	WESSEX WATER	420	3369.6	8.02285714285714	823.7
1438	102107	WESSEX WATER	179867	299980.8	1.6677923132092	1154.9
1439	011987	WESSEX WATER	344	1036.8	3.01395348837209	183
1440	070006	WESSEX WATER	280	1468.8	5.24571428571429	1171
1441	071233	WESSEX WATER	275	864	3.14181818181818	1169.4
1442	103731	WESSEX WATER	4679	12787.2	2.73289164351357	257.5
1443	070005	WESSEX WATER	425	864	2.03294117647059	229.8
1444	100930	WESSEX WATER	15200	NA	NA	94.5
1445	070026	WESSEX WATER	100	570.24	5.7024	86.3
1446	071798	WESSEX WATER	225	786.24	3.4944	26.9
1447	012129	WESSEX WATER	225	673.92	2.9952	204.5
1448	071978	WESSEX WATER	553	1658.88	2.99978300180832	2427.6
1449	071220	WESSEX WATER	909	2203.2	2.42376237623762	96
1450	071901	WESSEX WATER	2968	7214.4	2.43072776280323	646
1451	072373	WESSEX WATER	134	600.48	4.48119402985075	69.8
1452	070019	WESSEX WATER	155	768.96	4.96103225806452	115.5
1453	071196	WESSEX WATER	1166	2764.8	2.37118353344768	119.7
1454	071853	WESSEX WATER	341	872.64	2.55906158357771	771.3
1455	010265	WESSEX WATER	525	1555.2	2.96228571428571	999.7
1456	071889	WESSEX WATER	102	267.84	2.62588235294118	858.7
1457	011348	WESSEX WATER	65	198.72	3.05723076923077	585.5
1458	010031	WESSEX WATER	140	423.36	3.024	640.2
1459	072317	WESSEX WATER	80	367.2	4.59	354
1460	070154	WESSEX WATER	139	648	4.66187050359712	680.8
1461	101441	WESSEX WATER	250	717.12	2.86848	1424.7
1462	072493	WESSEX WATER	196	1296	6.61224489795918	380.5
1463	010039	WESSEX WATER	140	397.44	2.83885714285714	2413.3
1464	071221	WESSEX WATER	95	198.72	2.09178947368421	1832
1465	070053	WESSEX WATER	70	604.8	8.64	485.9
1466	010053	WESSEX WATER	85	259.2	3.04941176470588	428.1
1467	010054	WESSEX WATER	210	1261.44	6.00685714285714	369.4
1468	100288	WESSEX WATER	2229	5961.6	2.67456258411844	522.2
1469	010299	WESSEX WATER	55	328.32	5.96945454545455	56.2
1470	101049	WESSEX WATER	16520	NA	NA	0
1471	101440	WESSEX WATER	1212	2678.4	2.20990099009901	7.8
1472	100935	WESSEX WATER	11	NA	NA	891.8
1473	070063	WESSEX WATER	1922	NA	NA	786
1474	070076	WESSEX WATER	400	1296	3.24	561.3
1475	010156	WESSEX WATER	101	293.76	2.90851485148515	317.7
1476	010059	WESSEX WATER	85	423.36	4.98070588235294	24
1477	EPRMP3728GG	WESSEX WATER	227	1252.8	5.51894273127753	922
1478	100386	WESSEX WATER	6222	17280	2.77724204435873	176.3
1479	070086	WESSEX WATER	10	60.48	6.048	0
1480	071740	WESSEX WATER	30	172.8	5.76	506.8
1481	010063	WESSEX WATER	410	1209.6	2.95024390243902	96.3
1482	011557	WESSEX WATER	300	1123.2	3.744	11.3
1483	100385	WESSEX WATER	6110	15552	2.54533551554828	1312.7
1484	070087	WESSEX WATER	120	362.88	3.024	582.3
1485	070085	WESSEX WATER	71	NA	NA	237.7
1486	100318	WESSEX WATER	668	1874.88	2.80670658682635	120.3
1487	102629	WESSEX WATER	3011	15120	5.02158751245433	175.3
1488	100854	WESSEX WATER	1200	4432.32	3.6936	183.5
1489	011560	WESSEX WATER	230	527.04	2.29147826086957	445.8
1490	010071	WESSEX WATER	550	1347.84	2.45061818181818	382
1491	011559	WESSEX WATER	220	630.72	2.86690909090909	88.3
1492	072344	WESSEX WATER	328	1036.8	3.1609756097561	317
1493	072535	WESSEX WATER	169	440.64	2.60733727810651	114.3
1494	070099	WESSEX WATER	3000	9331.2	3.1104	138.7
1495	071228	WESSEX WATER	160	820.8	5.13	131.7
1496	070379	WESSEX WATER	310	2246.4	7.24645161290323	317.7
1497	010080	WESSEX WATER	505	864	1.71089108910891	370.7
1498	012549	WESSEX WATER	307	950.4	3.0957654723127	271.5
1499	071609	WESSEX WATER	300	1814.4	6.048	566.7
1500	101668	WESSEX WATER	295	864	2.92881355932203	36.3
1501	100881	WESSEX WATER	11618	NA	NA	0.9
1502	010304	WESSEX WATER	392	1036.8	2.64489795918367	78.1
1503	010092	WESSEX WATER	136	440.64	3.24	18.3
1504	010037	WESSEX WATER	460	950.4	2.06608695652174	152.1
1505	072054	WESSEX WATER	454	1382.4	3.04493392070485	97.9
1506	011563	WESSEX WATER	365	1434.24	3.92942465753425	118.5
1507	070130	WESSEX WATER	315	1296	4.11428571428571	977.5
1508	071670	WESSEX WATER	460	1166.4	2.53565217391304	0
1509	100334/FU/01	WESSEX WATER	24774	NA	NA	46.7
1510	071977	WESSEX WATER	720	2177.28	3.024	696.3
1511	100673	WESSEX WATER	2917	6652.8	2.28069934864587	195.4
1512	010101	WESSEX WATER	980	NA	NA	129.6
1513	T/83/45453/R	YORKSHIRE WATER	103	233.28	2.26485436893204	519
1514	T/83/45405/R	YORKSHIRE WATER	6200	14083.2	2.27148387096774	294
1515	967	YORKSHIRE WATER	6696	10195.2	1.52258064516129	876.2
1516	27/27/0140	YORKSHIRE WATER	27	60.48	2.24	198
1517	27/20/0134	YORKSHIRE WATER	310	1664.064	5.36794838709678	8.7
1518	430	YORKSHIRE WATER	2331	4285.44	1.8384555984556	1837.8
1519	27/23/0302	YORKSHIRE WATER	127	648	5.10236220472441	392.8
1520	27/24/0322	YORKSHIRE WATER	278	622.08	2.23769784172662	944.5
1521	27/22/0153	YORKSHIRE WATER	37	103.68	2.80216216216216	0
1522	WRA6885	YORKSHIRE WATER	85	596.16	7.01364705882353	170
1523	27/24/0368	YORKSHIRE WATER	143	570.24	3.98769230769231	232.8
1524	65	YORKSHIRE WATER	758	1788.48	2.35947229551451	824
1525	27/27/0155	YORKSHIRE WATER	NA	NA	NA	189.9
1526	27/23/0254	YORKSHIRE WATER	18.5	39.744	2.14832432432432	102.5
1527	381	YORKSHIRE WATER	1418	3395.52	2.39458392101551	652.5
1528	27/21/0166	YORKSHIRE WATER	24	51.84	2.16	254.3
1529	WRA7780	YORKSHIRE WATER	117	259.2	2.21538461538462	117
1530	3132(SS)	YORKSHIRE WATER	509	2160	4.24361493123772	131
1531	3143(SS)	YORKSHIRE WATER	NA	449.28	NA	246.8
1532	NPSWQD009944	YORKSHIRE WATER	19	103.68	5.45684210526316	0
1533	2216	YORKSHIRE WATER	27	406.08	15.04	303.3
1534	27/28/0171	YORKSHIRE WATER	12	25.92	2.16	159.3
1535	27/21/0205	YORKSHIRE WATER	398	1123.2	2.82211055276382	884.8
1536	27/29/0108	YORKSHIRE WATER	244	1442.88	5.91344262295082	1726
1537	E728(SS)	YORKSHIRE WATER	8199	18576	2.26564215148189	276.3
1538	2502	YORKSHIRE WATER	11713	27216	2.32357209937676	1155.8
1539	27/24/0166	YORKSHIRE WATER	1052	3758.4	3.57262357414449	1117.8
1540	27/29/0110	YORKSHIRE WATER	146	518.4	3.55068493150685	229
1541	27/27/0092	YORKSHIRE WATER	7	17.28	2.46857142857143	0
1542	EPRMB3797WP	YORKSHIRE WATER	3482	7508.16	2.15627800114877	688
1543	27/24/0330	YORKSHIRE WATER	14.8	31.968	2.16	147.8
1544	27/24/0369	YORKSHIRE WATER	118	864	7.32203389830508	529.8
1545	2855	YORKSHIRE WATER	513	3576.96	6.97263157894737	198.3
1546	C4569	YORKSHIRE WATER	NA	NA	NA	772
1547	27/19/0075	YORKSHIRE WATER	821	4078.08	4.96721071863581	308.5
1548	27/25/0097	YORKSHIRE WATER	22	51.84	2.35636363636364	102.8
1549	27/28/0183	YORKSHIRE WATER	47.5	103.68	2.18273684210526	116
1550	27/19/0083	YORKSHIRE WATER	102	181.44	1.77882352941176	114
1551	27/23/0264	YORKSHIRE WATER	151	544.32	3.60476821192053	22.3
1552	27/28/0172	YORKSHIRE WATER	19	NA	NA	2.5
1553	27/25/0119	YORKSHIRE WATER	101	224.64	2.22415841584158	189
1554	27/23/0280	YORKSHIRE WATER	87	578.88	6.65379310344828	205.3
1555	27/20/0128	YORKSHIRE WATER	367	743.04	2.02463215258856	511
1556	27/28/0180	YORKSHIRE WATER	22	51.84	2.35636363636364	1360
1557	27/19/0078	YORKSHIRE WATER	138	333.504	2.41669565217391	94.8
1558	27/21/0139	YORKSHIRE WATER	492	1157.76	2.35317073170732	840.5
1559	27/25/0083	YORKSHIRE WATER	64	146.88	2.295	1544.7
1560	27/23/0263	YORKSHIRE WATER	40	155.52	3.888	19
1561	27/29/0109	YORKSHIRE WATER	54.5	336.96	6.18275229357798	97
1562	27/23/0305	YORKSHIRE WATER	13.1	28.512	2.17648854961832	1713.8
1563	27/25/0111	YORKSHIRE WATER	14	34.56	2.46857142857143	242.5
1564	27/25/0125	YORKSHIRE WATER	13	34.56	2.65846153846154	148
1565	WRA6832	YORKSHIRE WATER	848	2332.8	2.75094339622642	962.8
1566	27/25/0132	YORKSHIRE WATER	52	112.32	2.16	58.8
1567	27/22/0063	YORKSHIRE WATER	596	1520.64	2.55140939597315	546.8
1568	27/23/0256	YORKSHIRE WATER	34.2	74.304	2.17263157894737	1606
1569	27/23/0281	YORKSHIRE WATER	177	397.44	2.24542372881356	272.3
1570	27/23/0194	YORKSHIRE WATER	103	267.84	2.60038834951456	725.3
1571	27/28/0165	YORKSHIRE WATER	31	69.12	2.22967741935484	438.3
1572	27/22/0135	YORKSHIRE WATER	133	587.52	4.41744360902256	18.5
1573	27/23/0272	YORKSHIRE WATER	22	46.656	2.12072727272727	672
1574	WRA6756	YORKSHIRE WATER	29600	70243.2	2.37308108108108	1110.8
1575	27/23/0249	YORKSHIRE WATER	17	34.56	2.03294117647059	32
1576	27/23/0271	YORKSHIRE WATER	234	NA	NA	65
1577	27/24/0362	YORKSHIRE WATER	115	665.28	5.78504347826087	65
1578	27/23/0279	YORKSHIRE WATER	2393	5546.88	2.31796071876306	1187.3
1579	NPSWQD009922	YORKSHIRE WATER	8	86.4	10.8	71.7
1580	27/27/0053	YORKSHIRE WATER	16113	NA	NA	348.5
1581	27/21/0091	YORKSHIRE WATER	132	345.6	2.61818181818182	544.3
1582	27/24/0363	YORKSHIRE WATER	174	466.56	2.68137931034483	441.8
1583	2838	YORKSHIRE WATER	6108	14169.6	2.31984282907662	719.5
1584	27/23/0216	YORKSHIRE WATER	12.3	26.784	2.17756097560976	1050.7
1585	27/23/0201	YORKSHIRE WATER	156	285.12	1.82769230769231	784.5
1586	2363	YORKSHIRE WATER	575	3438.72	5.98038260869565	340.3
1587	WRA 6647	YORKSHIRE WATER	5730	NA	NA	903.3
1588	E698(SS)	YORKSHIRE WATER	449	1097.28	2.44383073496659	1297
1589	27/23/0138	YORKSHIRE WATER	3646	7750.08	2.12563905650027	1800.2
1590	27/24/0321	YORKSHIRE WATER	353	829.44	2.34968838526912	646.3
1591	27/20/0129	YORKSHIRE WATER	313	673.92	2.15309904153355	1071.8
1592	2172	YORKSHIRE WATER	6850	NA	NA	1053.3
1593	27/29/0046	YORKSHIRE WATER	6660	NA	NA	1274.3
1594	3334(SS)	YORKSHIRE WATER	28343	72748.8	2.56672899834174	1170.1
1595	AW1NF1451	ANGLIAN WATER	106	552.96	5.21660377358491	288.88
1596	AWNNF13532	ANGLIAN WATER	15	103.68	6.912	1264.5
1597	AW3NFF821	ANGLIAN WATER	1300	2764.8	2.12676923076923	676.75
1598	AWCNF10330	ANGLIAN WATER	112	293.76	2.62285714285714	10.71
1599	232/1118	NORTHUMBRIAN WATER	324	756	2.33333333333333	2440.32
1600	222/0862	NORTHUMBRIAN WATER	3322	6825.6	2.05466586393739	153.5
1601	222/0844	NORTHUMBRIAN WATER	418	4233.6	10.1282296650718	24
1602	223/0419	NORTHUMBRIAN WATER	9.5	NA	NA	321
1603	232/1127	NORTHUMBRIAN WATER	340	NA	NA	199.25
1604	253/1278	NORTHUMBRIAN WATER	15851	40003.2	2.52370197463882	302.97
1605	252/0364	NORTHUMBRIAN WATER	NA	NA	NA	151.49
1606	245/1246	NORTHUMBRIAN WATER	4320	24019.2	5.56	237.58
1607	231/1086	NORTHUMBRIAN WATER	346	838.08	2.42219653179191	2803.88
1608	244/0991	NORTHUMBRIAN WATER	576	1520.64	2.64	893.2
1609	210/0881	NORTHUMBRIAN WATER	NA	NA	NA	315
1610	210/1273	NORTHUMBRIAN WATER	8100	14083.2	1.73866666666667	54.47
1611	25/04/1750	NORTHUMBRIAN WATER	135	195.264	1.4464	6.25
1612	235/1891	NORTHUMBRIAN WATER	10043	23587.2	2.348620930001	415.57
1613	234/1069	NORTHUMBRIAN WATER	59	146.88	2.48949152542373	59.61
1614	226/1179	NORTHUMBRIAN WATER	11664	6652.8	0.57037037037037	1115.75
1615	254/1920	NORTHUMBRIAN WATER	171140	20995.2	0.122678508823186	625.54
1616	221/1035	NORTHUMBRIAN WATER	664	1658.88	2.49831325301205	995.25
1617	25/02/1105	NORTHUMBRIAN WATER	77.8	181.44	2.33213367609255	440.22
1618	253/1277	NORTHUMBRIAN WATER	28	NA	NA	98.88
1619	243/1024	NORTHUMBRIAN WATER	95	224.64	2.36463157894737	1.5
1620	245/1269	NORTHUMBRIAN WATER	1054	NA	NA	320.63
1621	244/0985	NORTHUMBRIAN WATER	4676	12528	2.6792130025663	333
1622	233/1200	NORTHUMBRIAN WATER	2704	8121.6	3.00355029585799	856.36
1623	242/1072	NORTHUMBRIAN WATER	NA	NA	NA	35.75
1624	233/1207	NORTHUMBRIAN WATER	NA	NA	NA	15.25
1625	226/1119	NORTHUMBRIAN WATER	10573	23328	2.20637472808096	767
1626	25/04/1800	NORTHUMBRIAN WATER	78	420.768	5.39446153846154	260.59
1627	235/2007	NORTHUMBRIAN WATER	23	NA	NA	437.6
1628	234/0893	NORTHUMBRIAN WATER	NA	NA	NA	476.75
1629	242/1052	NORTHUMBRIAN WATER	609	1425.6	2.34088669950739	32.5
1630	231/1077	NORTHUMBRIAN WATER	NA	NA	NA	3572.39
1631	25/01/0920	NORTHUMBRIAN WATER	203	476.928	2.34939901477833	24.1
1632	226/1187	NORTHUMBRIAN WATER	9600	19785.6	2.061	329.21
1633	234/1061	NORTHUMBRIAN WATER	12000	27648	2.304	1273.94
1634	244/1006	NORTHUMBRIAN WATER	1410	3283.2	2.32851063829787	359.17
1635	235/1871	NORTHUMBRIAN WATER	5915	13910.4	2.35171597633136	2217.9
1636	221/0912	NORTHUMBRIAN WATER	137	406.08	2.96408759124088	62
1637	245/1064	NORTHUMBRIAN WATER	711	1658.88	2.33316455696203	557.54
1638	25/01/0910	NORTHUMBRIAN WATER	76	NA	NA	0
1639	245/0839	NORTHUMBRIAN WATER	240	665.28	2.772	261.21
1640	25/04/1783	NORTHUMBRIAN WATER	NA	NA	NA	175.4
1641	221/1056	NORTHUMBRIAN WATER	34	NA	NA	14.25
1642	210/0899	NORTHUMBRIAN WATER	10	NA	NA	90.34
1643	221/A/0845	NORTHUMBRIAN WATER	294	864	2.93877551020408	262.68
1644	25/02/1107	NORTHUMBRIAN WATER	71	164.16	2.31211267605634	2174.17
1645	223/0993	NORTHUMBRIAN WATER	971	1330.56	1.37029866117405	2309.1
1646	25/03/1234	NORTHUMBRIAN WATER	1007	2350.08	2.33374379344588	109.17
1647	232/1119	NORTHUMBRIAN WATER	234	596.16	2.54769230769231	0.25
1648	25/04/1758	NORTHUMBRIAN WATER	44	NA	NA	2112.02
1649	25/04/1858	NORTHUMBRIAN WATER	249	578.88	2.32481927710843	804.79
1650	25/04/1676	NORTHUMBRIAN WATER	313	604.8	1.93226837060703	24.5
1651	256/1062	NORTHUMBRIAN WATER	NA	NA	NA	49.5
1652	210/A/0849	NORTHUMBRIAN WATER	250	829.44	3.31776	454.96
1653	232/A/0911	NORTHUMBRIAN WATER	50	NA	NA	35
1654	233/1184	NORTHUMBRIAN WATER	NA	NA	NA	283.25
1655	241/1147	NORTHUMBRIAN WATER	111	259.2	2.33513513513514	267.97
1656	223/0990	NORTHUMBRIAN WATER	29	NA	NA	633.92
1657	232/1165	NORTHUMBRIAN WATER	518	1209.6	2.33513513513514	360
1658	233/1266	NORTHUMBRIAN WATER	411	950.4	2.31240875912409	20
1659	223/0995	NORTHUMBRIAN WATER	12	NA	NA	51
1660	233/1281	NORTHUMBRIAN WATER	4960	8933.76	1.80116129032258	1301.56
1661	244/0087	NORTHUMBRIAN WATER	NA	NA	NA	1.13
1662	255/1145	NORTHUMBRIAN WATER	28361	72835.2	2.56814639822291	223.5
1663	235/1695	NORTHUMBRIAN WATER	229720	388800	1.6924952115619	4396.75
1664	25/04/1740	NORTHUMBRIAN WATER	63	146.88	2.33142857142857	672.98
1665	25/04/1751	NORTHUMBRIAN WATER	578	NA	NA	1661.98
1666	243/0965	NORTHUMBRIAN WATER	526	1386.72	2.63634980988593	294.3
1667	244/0986	NORTHUMBRIAN WATER	1261	3663.36	2.90512291831879	1191.28
1668	244/1028	NORTHUMBRIAN WATER	1472	3697.92	2.51217391304348	535.5
1669	234/1072	NORTHUMBRIAN WATER	3500	8294.4	2.36982857142857	863.83
1670	254/1940	NORTHUMBRIAN WATER	184	639.36	3.47478260869565	396.75
1671	232/1155	NORTHUMBRIAN WATER	40	NA	NA	14.74
1672	210/A/0854	NORTHUMBRIAN WATER	105	665.28	6.336	63.75
1673	224/0993	NORTHUMBRIAN WATER	3030	9072	2.99405940594059	2238.13
1674	232/1156	NORTHUMBRIAN WATER	40	NA	NA	85.33
1675	25/01/0919	NORTHUMBRIAN WATER	343	700.704	2.04286880466472	17.25
1676	235/0401	NORTHUMBRIAN WATER	NA	NA	NA	283.5
1677	255/0736	NORTHUMBRIAN WATER	NA	NA	NA	883.25
1678	253/0065	NORTHUMBRIAN WATER	NA	NA	NA	268.44
1679	25/06/1010	NORTHUMBRIAN WATER	132	527.04	3.99272727272727	351.46
1680	223/1000	NORTHUMBRIAN WATER	30	NA	NA	6.75
1681	223/0904	NORTHUMBRIAN WATER	35	NA	NA	207.5
1682	225/1031	NORTHUMBRIAN WATER	12200	32400	2.65573770491803	955.57
1683	243/1015	NORTHUMBRIAN WATER	100	233.28	2.3328	22.71
1684	210/1328	NORTHUMBRIAN WATER	163	380.16	2.33226993865031	2655.53
1685	252/0366	NORTHUMBRIAN WATER	NA	NA	NA	0.12
1686	252/0060	NORTHUMBRIAN WATER	NA	NA	NA	29.48
1687	232/1126	NORTHUMBRIAN WATER	25	NA	NA	0
1688	225/1079	NORTHUMBRIAN WATER	835	2332.8	2.79377245508982	285.61
1689	245/0842	NORTHUMBRIAN WATER	297	630.72	2.12363636363636	742.83
1690	245/1274	NORTHUMBRIAN WATER	421	984.96	2.33957244655582	169.9
1691	245/1383	NORTHUMBRIAN WATER	NA	NA	NA	12.75
1692	245/A/0712	NORTHUMBRIAN WATER	400	1140.48	2.8512	0
1693	242/1071	NORTHUMBRIAN WATER	354	924.48	2.61152542372881	106.84
1694	25/01/0912	NORTHUMBRIAN WATER	115	751.68	6.53634782608696	69.03
1695	241/1145	NORTHUMBRIAN WATER	87	527.04	6.05793103448276	792.24
1696	245/1254	NORTHUMBRIAN WATER	1467	3456	2.3558282208589	756.49
1697	25/03/1235	NORTHUMBRIAN WATER	236	1036.8	4.39322033898305	13.91
1698	221/1076	NORTHUMBRIAN WATER	1463	4492.8	3.07095010252905	0.03
1699	255/1125	NORTHUMBRIAN WATER	14256	28512	2	864.13
1700	254/1864	NORTHUMBRIAN WATER	1517	3576.96	2.35791694133158	1201.04
1701	245/1243	NORTHUMBRIAN WATER	13500	29289.6	2.1696	172.23
1702	25/06/1032	NORTHUMBRIAN WATER	3699	6998.4	1.89197080291971	312.5
1703	223/0991	NORTHUMBRIAN WATER	376	NA	NA	106
1704	233/1178	NORTHUMBRIAN WATER	86	518.4	6.02790697674419	26.57
1705	25/02/1121	NORTHUMBRIAN WATER	245	NA	NA	19.75
1706	226/A/0874	NORTHUMBRIAN WATER	150	864	5.76	153.95
1707	241/1100	NORTHUMBRIAN WATER	931	1931.904	2.07508485499463	453.41
1708	25/04/1656	NORTHUMBRIAN WATER	1870	5789.664	3.09607700534759	188
1709	25/04/1797	NORTHUMBRIAN WATER	28600	61922.88	2.16513566433566	233
1710	243/0976	NORTHUMBRIAN WATER	191	449.28	2.35225130890052	1705.57
1711	254/1962	NORTHUMBRIAN WATER	292	660.096	2.26060273972603	228.18
1712	254/1866	NORTHUMBRIAN WATER	447	NA	NA	311.75
1713	25/04/1611	NORTHUMBRIAN WATER	NA	NA	NA	221.74
1714	232/1147	NORTHUMBRIAN WATER	13	NA	NA	84.42
1715	224/0992	NORTHUMBRIAN WATER	174	846.72	4.86620689655173	1395.87
1716	241/1106	NORTHUMBRIAN WATER	603	1296	2.14925373134328	375.25
1717	243/0985	NORTHUMBRIAN WATER	6751	17176.32	2.54426307213746	896.16
1718	25/03/1232	NORTHUMBRIAN WATER	1308	3204.576	2.44998165137615	924.22
1719	224/A/0886	NORTHUMBRIAN WATER	85	267.84	3.15105882352941	320.62
1720	243/0966	NORTHUMBRIAN WATER	12960	27457.92	2.11866666666667	2085.5
1721	245/1206	NORTHUMBRIAN WATER	NA	NA	NA	0.5
1722	231/0271	NORTHUMBRIAN WATER	NA	NA	NA	0.25
1723	210/1312	NORTHUMBRIAN WATER	33	NA	NA	347.37
1724	231/A/1033	NORTHUMBRIAN WATER	145	NA	NA	197.36
1725	245/1271	NORTHUMBRIAN WATER	621	1451.52	2.33739130434783	150
1726	245/1244	NORTHUMBRIAN WATER	15800	47260.8	2.99118987341772	56.99
1727	241/1146	NORTHUMBRIAN WATER	331	820.8	2.4797583081571	697.3
1728	222/0864	NORTHUMBRIAN WATER	77	181.44	2.35636363636364	0
1729	243/0968	NORTHUMBRIAN WATER	2500	7780.32	3.112128	134.5
1730	25/02/1087	NORTHUMBRIAN WATER	59.6	138.24	2.31946308724832	33.73
1731	25/02/1120	NORTHUMBRIAN WATER	60	1296	21.6	0.25
1732	210/1275	NORTHUMBRIAN WATER	578	3456	5.97923875432526	218.53
1733	241/1102	NORTHUMBRIAN WATER	1021	NA	NA	60.5
1734	225/1036	NORTHUMBRIAN WATER	4400	13564.8	3.08290909090909	382.85
1735	T/01/35418/S	SEVERN TRENT	NA	NA	NA	8.616944433
1736	S/05/55894/R	SEVERN TRENT	105	311.04	2.96228571428571	2069.789166
1737	S/05/55875/R	SEVERN TRENT	1280	3939.84	3.078	539.8683328
1738	S/08/55849/R	SEVERN TRENT	52	388.8	7.47692307692308	66.9066661
1739	T/06/35611/R	SEVERN TRENT	288	725.76	2.52	2089.745278
1740	S/15/26435/R	SEVERN TRENT	3150	5201.28	1.6512	1310.726943
1741	T/41/45824/R	SEVERN TRENT	8283	22464	2.71206084751901	1041.778611
1742	S/09/56139/R	SEVERN TRENT	53	259.2	4.89056603773585	347.3424987
1743	T/07/36151/R	SEVERN TRENT	1350	2102.976	1.55776	694.0244439
1744	T/81/45466/R	SEVERN TRENT	178	457.92	2.57258426966292	941.05
1745	T/83/45559/R	SEVERN TRENT	730	1866.24	2.55649315068493	1643.57
1746	T/30/36203/R	SEVERN TRENT	1489	2715.552	1.82374210879785	771.3199989
1747	S/15/25875/R	SEVERN TRENT	3000	8519.04	2.83968	454.4352774
1748	T/41/45524/R	SEVERN TRENT	485	1857.6	3.83010309278351	349.8949996
1749	S/02/56058/R	SEVERN TRENT	360	1080	3	229.0924999
1750	T/05/36081/R	SEVERN TRENT	1372	3343.68	2.43708454810496	230.2369412
1751	T/83/45356/R	SEVERN TRENT	4025	10601.28	2.63385838509317	1036.98
1752	T/55/45649/R	SEVERN TRENT	275	915.84	3.33032727272727	792.3649998
1753	T/29/35728/R	SEVERN TRENT	4840	6912	1.42809917355372	310.2377777
1754	T/41/45611/R	SEVERN TRENT	510	751.68	1.47388235294118	1072.668885
1755	T/54/45472/R	SEVERN TRENT	100	NA	NA	744.9433333
1756	S/19/26530/R	SEVERN TRENT	550	1425.6	2.592	64.38777757
1757	S/22/26628/R	SEVERN TRENT	367	1632.96	4.44948228882834	305.3924907
1758	T/19/35541/R	SEVERN TRENT	3950	6462.72	1.63613164556962	1539.7388872
1759	S/06/55227/R	SEVERN TRENT	47500	150336	3.16496842105263	997.6147208
1760	T/57/45505/R	SEVERN TRENT	3355	6721.92	2.00355290611028	232.1122222
1761	S/08/26522/R	SEVERN TRENT	13400	20459.52	1.52682985074627	1016.733055
1762	S/05/55881/R	SEVERN TRENT	144	578.88	4.02	22.43666638
1763	S/12/25831/R	SEVERN TRENT	23	103.68	4.50782608695652	218.2816662
1764	S/17/25751/R	SEVERN TRENT	220	812.16	3.69163636363636	1296.796111
1765	S/06/56018/R	SEVERN TRENT	500	NA	NA	6.231666633
1766	T/42/46187/R	SEVERN TRENT	4453	13504.32	3.03263417920503	596.8799996
1767	T/70/45934/R	SEVERN TRENT	1144	3317.76	2.90013986013986	149.94
1768	S/13/25360/R	SEVERN TRENT	1870	5201.28	2.78143315508021	3204.284721
1769	T/51/45517/R	SEVERN TRENT	200	527.04	2.6352	1798.793051
1770	T/20/35982/R	SEVERN TRENT	186	NA	NA	934.3391666
1771	S/20/26262/R	SEVERN TRENT	3753	7542.72	2.00978417266187	480.2999923
1772	S/17/25865/R	SEVERN TRENT	133	648	4.87218045112782	1.583333333
1773	S/09/55638/RG	SEVERN TRENT	3	NA	NA	566.3630539
1774	S/04/55801/R	SEVERN TRENT	223	NA	NA	26.67555543
1775	T/79/46216/R	SEVERN TRENT	285	NA	NA	169.0669443
1776	T/65/45553/R	SEVERN TRENT	1062	3058.56	2.88	290.02
1777	T/72/45594/R	SEVERN TRENT	2342	6739.2	2.87754056362084	1195.951111
1778	S/02/55802/R	SEVERN TRENT	240	656.64	2.736	2225.265555
1779	T/83/45636/R	SEVERN TRENT	314	1231.2	3.92101910828025	272.43
1780	T/38/46039/R	SEVERN TRENT	2190	4060.8	1.85424657534247	2372.370277
1781	T/34/36002/R	SEVERN TRENT	235	699.84	2.97804255319149	35.32666628
1782	S/17/26031/R	SEVERN TRENT	1084	NA	NA	655.2472202
1783	S/12/26147/R	SEVERN TRENT	500	1632.96	3.26592	549.6513882
1784	S/02/56079/R	SEVERN TRENT	2954	8847.36	2.99504400812458	439.1499979
1785	S/16/26056/R	SEVERN TRENT	1230	3214.08	2.61307317073171	236.4322217
1786	S/07/56027/R	SEVERN TRENT	11500	31000.32	2.69568	609.4452774
1787	S/20/25648/R	SEVERN TRENT	260	1209.6	4.65230769230769	413.4591663
1788	S/09/55737/R	SEVERN TRENT	280	NA	NA	395.0955554
1789	S/02/55516/R	SEVERN TRENT	58	NA	NA	0
1790	T/17/35855/R	SEVERN TRENT	7400	19872	2.68540540540541	386.0327774
1791	S/10/26091/R	SEVERN TRENT	366	699.84	1.91213114754098	174.2808332
1792	S/05/56082/R	SEVERN TRENT	20	95.04	4.752	0.175
1793	T/54/45615/R	SEVERN TRENT	118	717.12	6.07728813559322	364.0480551
1794	T/64/45588/R	SEVERN TRENT	1825	5184	2.84054794520548	790.7408332
1795	S/07/56187/R	SEVERN TRENT	165	NA	NA	16.27694432
1796	S/04/55997/R	SEVERN TRENT	110	328.32	2.98472727272727	24.78249987
1797	S/14/26294/R	SEVERN TRENT	365	708.48	1.94104109589041	1929.026666
1798	T/23/36154/R	SEVERN TRENT	17	43.2	2.54117647058824	35.53749978
1799	S/14/25988/R	SEVERN TRENT	1630	2730.24	1.67499386503068	484.9466657
1800	S/20/25769/R	SEVERN TRENT	34	155.52	4.57411764705882	337.1936108
1801	S/10/25784/R	SEVERN TRENT	78	233.28	2.99076923076923	98.02805264
1802	T/24/36133/R	SEVERN TRENT	47000	112665.6	2.39714042553191	1515.70694377
1803	S/09/56076/R	SEVERN TRENT	170	1045.44	6.14964705882353	265.1199915
1804	S/20/25975/R	SEVERN TRENT	840	4294.08	5.112	296.147222
1805	S/05/55897/R	SEVERN TRENT	112	311.04	2.77714285714286	1014.783055
1806	T/41/45710/R	SEVERN TRENT	1094	3456	3.15904936014625	957.8749995
1807	S/09/55898/R	SEVERN TRENT	500	1382.4	2.7648	420.7849998
1808	S/09/55923/R	SEVERN TRENT	180	1010.88	5.616	309.889722
1809	S/20/26180/R	SEVERN TRENT	6680	13651.2	2.04359281437126	660.769444
1810	S/02/56070/R	SEVERN TRENT	17700	38016	2.14779661016949	401.9130553
1811	S/09/55757/R	SEVERN TRENT	760	1503.36	1.97810526315789	1755.522777
1812	T/54/45654/R	SEVERN TRENT	12	60.48	5.04	2376.586944
1813	T/69/45554/R	SEVERN TRENT	625	1641.6	2.62656	741.7
1814	NPSWQD002550	SEVERN TRENT	21	84.672	4.032	0
1815	S/02/55629/R	SEVERN TRENT	316	NA	NA	50.84916667
1816	EPRAB3097AP	SEVERN TRENT	29	NA	NA	2.849444433
1817	S/02/55905/R	SEVERN TRENT	150	432	2.88	0.909444433
1818	T/84/46212/R	SEVERN TRENT	800	1831.68	2.2896	0
1819	T/25/35877/R	SEVERN TRENT	NA	40.608	NA	3.485555433
1820	S/19/25637/R	SEVERN TRENT	160	449.28	2.808	3834.143889
1821	T/33/35576/R	SEVERN TRENT	13	26.784	2.06030769230769	7.289444349
1822	S/19/25866/R	SEVERN TRENT	124	272.16	2.19483870967742	145.988332
1823	S/06/56085/R	SEVERN TRENT	4	25.92	6.48	5.273888867
1824	T/23/08420/R	SEVERN TRENT	725	3006.72	4.1472	645.4047221
1825	S/13/26040/R	SEVERN TRENT	12	78.624	6.552	48.96666666
1826	S/02/55348/R	SEVERN TRENT	110	345.6	3.14181818181818	92.24527721
1827	T/44/08090/R	SEVERN TRENT	1515	3991.68	2.63477227722772	526.2808329
1828	S/21/26719/R	SEVERN TRENT	130	648	4.98461538461538	17.84444435
1829	S/15/25854/R	SEVERN TRENT	35	NA	NA	2.555833031
1830	T/69/45785/R	SEVERN TRENT	1160	2782.08	2.39834482758621	0
1831	S/17/25772/R	SEVERN TRENT	260	NA	NA	174.5291664
1832	T/70/45573/R	SEVERN TRENT	3189	8899.2	2.79059266227658	125.17
1833	T/07/35741/R	SEVERN TRENT	25	97.632	3.90528	637.2874999
1834	T/67/45596/R	SEVERN TRENT	243	1054.08	4.33777777777778	550.85
1835	S/13/25835/R	SEVERN TRENT	460	1874.88	4.07582608695652	967.7419442
1836	EPRCB3492RW	SEVERN TRENT	1424	4017.6	2.82134831460674	112.9977776
1837	T/64/45766/R	SEVERN TRENT	600	1495.584	2.49264	478.75
1838	T/36/46320/R	SEVERN TRENT	900	1900.8	2.112	752.5205553
1839	S/17/26427/R	SEVERN TRENT	5797	16329.6	2.81690529584268	301.5661055
1840	S/12/25307/R	SEVERN TRENT	205	924.48	4.50965853658537	1880.007221
1841	T/54/45286/R	SEVERN TRENT	14	108.864	7.776	1626.921108
1842	T/41/45541/R	SEVERN TRENT	800	2384.64	2.9808	1383.260277
1843	S/17/26537/R	SEVERN TRENT	54	172.8	3.2	97.63833249
1844	S/04/55545/R	SEVERN TRENT	20	164.16	8.208	0
1845	S/20/26558/R	SEVERN TRENT	1060	1613.088	1.52178113207547	2485.26361
1846	T/30/35538/R	SEVERN TRENT	1014	2384.64	2.35171597633136	2089.455555
1847	S/12/25970/R	SEVERN TRENT	888	1676.16	1.88756756756757	456.7358296
1848	T/50/45550/R	SEVERN TRENT	30	302.4	10.08	8.10777775
1849	T/51/45532/R	SEVERN TRENT	80	362.88	4.536	972.273333
1850	S/20/26440/R	SEVERN TRENT	42800	104976	2.45271028037383	2749.530556
1851	S/04/56001/R	SEVERN TRENT	9	81.216	9.024	1238.063053
1852	T/02/35730/R	SEVERN TRENT	236	1167.264	4.94603389830509	9.47277775
1853	S/17/26193/R	SEVERN TRENT	21	77.76	3.70285714285714	441.3994439
1854	S/08/25797/R	SEVERN TRENT	30	NA	NA	1880.466388
1855	S/08/55438/R	SEVERN TRENT	21.5	NA	NA	26.39944435
1856	T/84/45990/R	SEVERN TRENT	231	1045.44	4.52571428571429	62.0241663
1857	T/74/45346/R	SEVERN TRENT	19	94.176	4.95663157894737	320.015833
1858	S/09/55973/R	SEVERN TRENT	390	1045.44	2.68061538461538	904.1191664
1859	T/33/35725/R	SEVERN TRENT	45	259.2	5.76	17.4908332
1860	S/19/25309/R	SEVERN TRENT	75	336.96	4.4928	2980.620278
1861	S/10/26277/R	SEVERN TRENT	220	622.08	2.82763636363636	365.520828
1862	T/38/46316/R	SEVERN TRENT	516	1454.976	2.81972093023256	2173.383884
1863	T/82/45052/R	SEVERN TRENT	1100	2393.28	2.17570909090909	717
1864	S/17/26284/R	SEVERN TRENT	475	1710.72	3.60151578947368	345.8927776
1865	S/04/55903/R	SEVERN TRENT	210	1088.64	5.184	77.52305548
1866	T/29/35579/R	SEVERN TRENT	136	388.8	2.85882352941176	307.3186107
1867	S/18/25984/R	SEVERN TRENT	58	267.84	4.61793103448276	195.8255494
1868	T/01/36221/R	SEVERN TRENT	1754	3680.64	2.09842645381984	954.0458311
1869	S/08/56181/R	SEVERN TRENT	84	341.28	4.06285714285714	16.76361068
1870	S/16/26289/R	SEVERN TRENT	1646	6194.88	3.76359659781288	566.0030554
1871	T/55/45462/R	SEVERN TRENT	43	236.736	5.50548837209302	95.59277741
1872	S/14/25976/R	SEVERN TRENT	210	838.08	3.99085714285714	1255.036943
1873	T/59/45410/R	SEVERN TRENT	1589	4492.8	2.8274386406545	651.5952776
1874	T/41/45651/R	SEVERN TRENT	100	285.12	2.8512	327.6408315
1875	S/08/26590/R	SEVERN TRENT	1090	3300.48	3.02796330275229	628.6358322
1876	T/62/45371/R	SEVERN TRENT	1301	3563.136	2.73876710222905	1184.94
1877	T/45/45334/R	SEVERN TRENT	3248	6471.36	1.99241379310345	837.8099993
1878	S/13/25745/R	SEVERN TRENT	750	2430.432	3.240576	0.5375
1879	S/12/26563/R	SEVERN TRENT	658	2730.24	4.1493009118541	507.5155554
1880	T/47/46016/R	SEVERN TRENT	156	699.84	4.48615384615385	3113.101944
1881	T/50/46001/R	SEVERN TRENT	122	596.16	4.88655737704918	28.17138882
1882	T/29/35675/R	SEVERN TRENT	70	198.72	2.83885714285714	124.8233328
1883	T/69/45988/R	SEVERN TRENT	25	1641.6	65.664	0.043055533
1884	T/67/45313/R	SEVERN TRENT	11.3	54.432	4.81699115044248	0.209722217
1885	S/01/55405/R	SEVERN TRENT	NA	NA	NA	172.9302772
1886	S/09/55880/R	SEVERN TRENT	51	NA	NA	0
1887	T/66/46151/R	SEVERN TRENT	22	129.6	5.89090909090909	142.37
1888	S/18/25216/R	SEVERN TRENT	84	235.008	2.79771428571429	998.1030551
1889	T/54/45998/R	SEVERN TRENT	299	751.68	2.51397993311037	319.9433331
1890	T/69/45349/R	SEVERN TRENT	64	276.48	4.32	1493.005555
1891	T/30/36067/R	SEVERN TRENT	11903	32832	2.75829622784172	300.1147203
1892	S/09/55912/R	SEVERN TRENT	215	NA	NA	39.3669444
1893	S/13/25884/R	SEVERN TRENT	193	838.08	4.34238341968912	59.60083166
1894	S/13/25837/R	SEVERN TRENT	120	NA	NA	170.9897214
1895	S/10/26161/R	SEVERN TRENT	85	406.08	4.77741176470588	539.0102775
1896	T/51/46383/R	SEVERN TRENT	20.4	129.6	6.35294117647059	228.6683331
1897	S/02/55938/R	SEVERN TRENT	49	NA	NA	136.5216661
1898	S/20/26168/R	SEVERN TRENT	253	267.84	1.05865612648221	0
1899	S/04/55520/R	SEVERN TRENT	332	NA	NA	0
1900	T/57/08423/R	SEVERN TRENT	1000	1339.2	1.3392	961.9466512
1901	S/20/08537/R	SEVERN TRENT	1350	3637.44	2.6944	682.8488887
1902	S/02/55892/R	SEVERN TRENT	23	NA	NA	556.3211106
1903	T/57/45484/R	SEVERN TRENT	21500	59996.16	2.79051906976744	400.00888707
1904	S/17/25770/R	SEVERN TRENT	285	570.24	2.00084210526316	1535.642499
1905	S/17/26158/R	SEVERN TRENT	441	NA	NA	0
1906	S/20/26643/R	SEVERN TRENT	5755	12009.6	2.08681146828844	2908.121666
1907	S/08/25823/R	SEVERN TRENT	30	129.6	4.32	513.3788878
1908	T/76/45916/R	SEVERN TRENT	8591	25747.2	2.99699685717611	152.97
1909	T/45/45471/R	SEVERN TRENT	1570	3274.56	2.08570700636943	1363.956389
1910	T/33/36156/R	SEVERN TRENT	914	2202.336	2.4095579868709	560.2233332
1911	S/04/56026/R	SEVERN TRENT	3400	20390.4	5.99717647058824	17.63388873
1912	T/54/45475/R	SEVERN TRENT	143	561.6	3.92727272727273	259.864444
1913	T/33/35557/R	SEVERN TRENT	31.6	84.672	2.67949367088608	105.9908294
1914	T/74/45568/R	SEVERN TRENT	1631	4596.48	2.8181974248927	1.34
1915	T/29/35581/R	SEVERN TRENT	175	656.64	3.75222857142857	399.8438882
1916	T/61/45098/R	SEVERN TRENT	8582	22291.2	2.59743649498951	1668.109444
1917	S/02/55815/R	SEVERN TRENT	625	NA	NA	161.3372221
1918	T/36/45730/R	SEVERN TRENT	3220	9158.4	2.84422360248447	1329.661663
1919	S/02/55854/R	SEVERN TRENT	32	NA	NA	120.143611
1920	S/13/25818/R	SEVERN TRENT	36	216	6	502.5308328
1921	S/10/25789/R	SEVERN TRENT	267	501.12	1.87685393258427	462.7994442
1922	T/20/35857/R	SEVERN TRENT	9	NA	NA	4.05416665
1923	T/68/45770/R	SEVERN TRENT	10453	3888	0.371950636181001	173.11
1924	T/07/35744/R	SEVERN TRENT	130	449.28	3.456	486.6702776
1925	T/61/45995/R	SEVERN TRENT	12949	27993.6	2.16183489072515	664.87
1926	S/04/55587/R	SEVERN TRENT	35	263.52	7.52914285714286	17.97722205
1927	S/13/25874/R	SEVERN TRENT	120	544.32	4.536	541.0988837
1928	T/73/45542/R	SEVERN TRENT	92	446.688	4.85530434782609	43.69749992
1929	T/02/35582/R	SEVERN TRENT	57	285.12	5.00210526315789	26.90194435
1930	T/64/45170/R	SEVERN TRENT	148000	359942.4	2.43204324324324	872.4144441
1931	T/21/35938/R	SEVERN TRENT	24.6	120.96	4.91707317073171	51.91388786
1932	S/07/12734/R	SEVERN TRENT	220	699.84	3.18109090909091	31.54166662
1933	S/01/55211/R	SEVERN TRENT	4890	12671.424	2.59129325153374	1454.383888
1934	S/19/25426/R	SEVERN TRENT	130	599.616	4.61243076923077	375.0374961
1935	S/13/25796/R	SEVERN TRENT	8	NA	NA	92.13083298
1936	S/19/26007/R	SEVERN TRENT	3838	7637.76	1.99003647733194	123.8169444
1937	T/80/45348/R	SEVERN TRENT	16.1	78.624	4.88347826086957	232.2619437
1938	T/01/35916/R	SEVERN TRENT	4000	8398.08	2.09952	1474.925833
1939	S/02/56261/R	SEVERN TRENT	376	1010.88	2.68851063829787	586.6086108
1940	S/08/25693/R	SEVERN TRENT	2838	6652.8	2.34418604651163	596.1513851
1941	S/04/56056/R	SEVERN TRENT	443	1330.56	3.00352144469526	190.4102776
1942	T/55/45545/R	SEVERN TRENT	145	525.312	3.62284137931035	0
1943	S/08/26508/R	SEVERN TRENT	291	1339.2	4.6020618556701	915.8555552
1944	T/15/35759/R	SEVERN TRENT	118	570.24	4.83254237288136	395.4491658
1945	T/66/46191/R	SEVERN TRENT	152	967.68	6.36631578947368	184.56
1946	S/19/26264/R	SEVERN TRENT	3576	15662.592	4.37991946308725	89.98388867
1947	T/41/45580/R	SEVERN TRENT	1870	4345.92	2.32402139037433	1612.05972
1948	S/04/56176/R	SEVERN TRENT	68	345.6	5.08235294117647	180.3327765
1949	S/17/25849/R	SEVERN TRENT	39	181.44	4.65230769230769	51.61694433
1950	S/09/55964/R	SEVERN TRENT	56	336.96	6.01714285714286	0
1951	S/04/55141/R	SEVERN TRENT	23523	61542.72	2.61627853590103	1438.06222
1952	T/80/45390/R	SEVERN TRENT	735	1658.88	2.25697959183674	0
1953	T/67/45347/R	SEVERN TRENT	22.2	NA	NA	0
1954	S/18/26164/R	SEVERN TRENT	215	725.76	3.37562790697674	8.0225
1955	S/10/26120/R	SEVERN TRENT	28.3	259.2	9.15901060070671	463.8494432
1956	T/36/45805/R	SEVERN TRENT	1900	7827.84	4.11991578947368	923.0161106
1957	S/09/56086/R	SEVERN TRENT	23	103.68	4.50782608695652	229.829719
1958	T/34/35585/R	SEVERN TRENT	34	103.68	3.04941176470588	39.52388863
1959	S/05/56012/R	SEVERN TRENT	2082	NA	NA	0.947499916
1960	S/02/56373/R	SEVERN TRENT	20838	55512	2.66397926864382	4110.411386
1961	T/20/35695/R	SEVERN TRENT	150	NA	NA	204.3538888
1962	T/23/35619/R	SEVERN TRENT	420	923.616	2.19908571428571	2659.04748
1963	T/57/46075/R	SEVERN TRENT	9447	21340.8	2.25900285805018	1085.64
1964	T/71/45942/R	SEVERN TRENT	2023	4924.8	2.43440434997528	363.17
1965	S/13/25980/R	SEVERN TRENT	343	1624.32	4.73562682215743	86.14638872
1966	T/54/45992/R	SEVERN TRENT	123	453.6	3.68780487804878	772.0091663
1967	T/41/45538/R	SEVERN TRENT	542	2626.56	4.84605166051661	778.63749937
1968	S/15/26260/R	SEVERN TRENT	27500	52185.6	1.89765818181818	368.2077775
1969	S/09/56129/R	SEVERN TRENT	16.6	86.4	5.20481927710843	0.509166667
1970	S/07/56078/R	SEVERN TRENT	1200	4207.68	3.5064	145.5724995
1971	S/17/26029/R	SEVERN TRENT	204	876.096	4.29458823529412	892.1536105
1972	S/13/25718/R	SEVERN TRENT	13110	29548.8	2.25391304347826	372.1386101
1973	S/14/26229/R	SEVERN TRENT	72	362.88	5.04	1.634166549
1974	T/01/36052/R	SEVERN TRENT	120000	236563.2	1.97136	1023.24
1975	T/33/35620/R	SEVERN TRENT	30	146.88	4.896	2329.839166
1976	T/66/45287/R	SEVERN TRENT	10	82.08	8.208	390.53
1977	T/57/46002/R	SEVERN TRENT	1058	1866.24	1.76393194706994	1016.209443
1978	T/39/46111/RG	SEVERN TRENT	138.2	NA	NA	11.55249997
1979	S/10/26596/R	SEVERN TRENT	130	NA	NA	2.252222217
1980	S/09/55831/R	SEVERN TRENT	1247	2073.6	1.66287089013633	1540.955277
1981	S/17/26480/R	SEVERN TRENT	5192	13156.992	2.53408936825886	883.9377776
1982	T/55/45647/R	SEVERN TRENT	245	466.56	1.90432653061225	300.4519442
1983	T/49/45285/R	SEVERN TRENT	25	120.096	4.80384	198.5052767
1984	S/18/25752/R	SEVERN TRENT	87	367.2	4.22068965517241	426.4852765
1985	T/39/45417/R	SEVERN TRENT	462	1123.2	2.43116883116883	1629.439444
1986	T/36/45812/R	SEVERN TRENT	175	362.88	2.0736	217.9791666
1987	T/66/45337/R	SEVERN TRENT	10.7	864	80.7476635514019	162.1933305
1988	S/09/55357/R	SEVERN TRENT	12.8	66.528	5.1975	48.90083315
1989	S/17/25353/R	SEVERN TRENT	423	915.84	2.16510638297872	2695.910833
1990	T/43/46063/R	SEVERN TRENT	110	311.04	2.82763636363636	24.63944438
1991	S/08/25699/R	SEVERN TRENT	1180	3456	2.92881355932203	1407.2025
1992	S/17/25981/R	SEVERN TRENT	77	354.24	4.60051948051948	3.6622222
1993	T/33/36107/R	SEVERN TRENT	5115	18403.2	3.59788856304985	314.7094436
1994	T/83/46197/R	SEVERN TRENT	336	NA	NA	0
1995	T/04/35840/R	SEVERN TRENT	3.3	NA	NA	43.11999998
1996	EPRWB3499NQ	SEVERN TRENT	270	1460.16	5.408	846.3041665
1997	T/26/35919/R	SEVERN TRENT	58	146.88	2.53241379310345	535.2208332
1998	S/10/26433/R	SEVERN TRENT	207	1077.408	5.20486956521739	37.0908333
1999	S/13/26721/R	SEVERN TRENT	1559	3611.52	2.31656189865298	1654.807777
[truncated: 532 more rows]
