# Supplementary material for: Combined sewer overflows: relating event duration monitoring data to wastewater systems' capacity in England
Source: Royal Society of Chemistry journal article supplement (doi:10.1039/d2ew00637e), 2023-01-01
Supplement: d2ew00637e3.pdf [file d2ew00637e3.pdf]

# Supplementary Material

## Contents

|                                                                                                                                  |    |
|----------------------------------------------------------------------------------------------------------------------------------|----|
| <i>Section 1. EDM data and quality control</i> .....                                                                             | 2  |
| <i>Section 2. Method for connecting CSOs to their wastewater systems</i> .....                                                   | 4  |
| <i>Section 3. Hydraulic capacity as FFT/DWF ratio per WWTWs</i> .....                                                            | 5  |
| <i>Section 4. Wastewater systems with available data</i> .....                                                                   | 6  |
| <i>Section 5. Method for estimating wastewater systems spill duration</i> .....                                                  | 7  |
| <i>Section 6. Results for 2020</i> .....                                                                                         | 13 |
| <i>Section 7. The case of Beckton, Crossness and Mogden wastewater systems</i> .....                                             | 15 |
| <i>Section 8. Primary reason reported by the sewerage companies for the EDM CSOs with high spill frequency during 2021</i> ..... | 16 |

## Section 1. EDM data and quality control

Annual EDM (i.e. spill duration and counts) data for 2021, 2020 per CSO for the nine Water and Sewerage Companies with overflows in England were acquired from the Environment Agency<sup>1</sup>. These data are returned by the Water and Sewerage Companies to the Environment Agency as part of their regulatory return each year to fulfil their permitted conditions to discharge from these storm overflows under the Environmental Permitting Regulations. EDM data were processed for duplicates and missing/wrong permit numbers/names using as a reference the Environment Agency's Consented Discharges to Controlled Waters with Condition dataset<sup>2</sup>. Some EDM returns had multiple meters on a single discharge activity, the higher of the reported spill durations and count per permit number were taken, unless the comment indicates that the meters were not working properly in which case, we nulled the value. EDM overflow type, locations, the date of permit issue, effective and revocation were extracted from the Environment Agency's Consented Discharges to Controlled Waters with Condition dataset<sup>2</sup>. EDM records that could not be matched to a permit number in the consented discharges database have been excluded. The CSO permits declared by the sewerage companies, those included in EDM 2021 and EDM 2020 datasets and those that passed the quality control and were eventually included in the analyses are shown in the Supplementary Tables 1.1 and 1.2 respectively. For the CSOs included in the analyses also shown in Electronic Supplementary Table 1

Considering that these data were collected by companies, we acknowledge limitations related to the fact that monitors might not have been operational 100% of the reporting period. For example, during 2021 we found that about 87% of the records in EDM 2021 dataset for the CSOs that we studied, cover 90% or above of the reporting period which might have led to an underestimation of the wastewater system spill durations we report in this study for that year (see Supplementary Table 1.3).

*Supplementary Table 1.1 CSO permits declared and included in EDM 2021 per water company and those that passed the quality control and were included in the analyses.*

| Water Company | CSO declared by water companies | All EDM dataset rows with CSO permit numbers | All EDM dataset rows with CSO permit numbers and durations | EDM CSOs (unique permit numbers) with durations | EDM CSOs (unique permit numbers) with durations connected to Consents | EDM CSOs with durations connected to Consents including multiple meters on a single discharge activity | EDM CSOs included in the analyses |
|---------------|---------------------------------|----------------------------------------------|------------------------------------------------------------|-------------------------------------------------|-----------------------------------------------------------------------|--------------------------------------------------------------------------------------------------------|-----------------------------------|
| Anglian       | 1,552                           | 1,552                                        | 834                                                        | 817                                             | 817                                                                   | 834                                                                                                    | 828                               |
| Northumbrian  | 1,567                           | 1,519                                        | 1,399                                                      | 1,358                                           | 1,356                                                                 | 1,397                                                                                                  | 1,373                             |
| Severn Trent  | 2,658                           | 2,238                                        | 2,121                                                      | 1,939                                           | 1,937                                                                 | 2,119                                                                                                  | 1,984                             |

|                         |        |        |        |        |        |        |        |
|-------------------------|--------|--------|--------|--------|--------|--------|--------|
| <b>South-West</b>       | 1,391  | 1,388  | 1,093  | 1,017  | 1,008  | 1,083  | 1,059  |
| <b>Southern</b>         | 978    | 971    | 943    | 886    | 872    | 929    | 897    |
| <b>Thames</b>           | 465    | 465    | 461    | 461    | 457    | 457    | 457    |
| <b>United Utilities</b> | 2,192  | 2,192  | 1,954  | 1,843  | 1,842  | 1,953  | 1,886  |
| <b>Wessex</b>           | 1,297  | 1,275  | 1,046  | 1,015  | 991    | 1,022  | 1,017  |
| <b>Yorkshire</b>        | 2,246  | 2,234  | 2,076  | 1,919  | 1,871  | 2,014  | 1,923  |
| <b>Totals</b>           | 14,346 | 13,834 | 11,927 | 11,255 | 11,151 | 11,808 | 11,424 |

Regarding the 11,151 distinct CSO permit numbers of EDM 2021, which passed the quality control and were connected to consents dataset, there can be multiple outlet types or even multiple matters per outlet type (yielding 11,808 rows in the dataset.) From these the final list of 11,424 CSOs was derived containing 273 CSOs that have more than one outlet types: 251 WWTW (both at the inlet and storm tank), 11 Sewer network - Pumping station, 7 WWTW a- Sewer network, 3 WWTW - Pumping station, 2 Sewer network - Sewer network. These were investigated as separate CSOs.

*Supplementary Table 1.2 CSO permits declared and included in EDM 2020 per water company and those that passed the quality control and were included in the analyses.*

| <b>Water Company</b>    | <b>CSO declared by water companies</b> | <b>CSO permit numbers in EDM 2020 datasets</b> | <b>EDM CSOs (unique permit numbers) connected to consents*</b> | <b>EDM CSOs included in the analyses (EDM CSOs connected to Consents* with duration)</b> |
|-------------------------|----------------------------------------|------------------------------------------------|----------------------------------------------------------------|------------------------------------------------------------------------------------------|
| <b>Anglian</b>          | 1,566                                  | 711                                            | 692                                                            | 668                                                                                      |
| <b>Northumbrian</b>     | 1,520                                  | 1,485                                          | 1,373                                                          | 1,373                                                                                    |
| <b>Severn Trent</b>     | 2,954                                  | 2,276                                          | 1,875                                                          | 1,875                                                                                    |
| <b>South-West</b>       | 1,209                                  | 1,095                                          | 955                                                            | 955                                                                                      |
| <b>Southern</b>         | 975                                    | 945                                            | 783                                                            | 777                                                                                      |
| <b>Thames</b>           | 472                                    | 463                                            | 447                                                            | 447                                                                                      |
| <b>United Utilities</b> | 2,273                                  | 1,925                                          | 1,691                                                          | 1,691                                                                                    |
| <b>Wessex</b>           | 1,289                                  | 971                                            | 919                                                            | 919                                                                                      |
| <b>Yorkshire</b>        | 2,241                                  | 2,105                                          | 1,905                                                          | 1,905                                                                                    |
| <b>Totals</b>           | 14,499                                 | 11,976                                         | 10,640                                                         | 10,610                                                                                   |

\*Excluding duplicates, missing permit numbers, wrong permit numbers/names

*Supplementary Table 1.3 EDM operation as percentage (%) of reporting period for 2021*

| <b>Water Company Name</b>     | <b>Below 50%</b> | <b>Equal or Over 60%</b> | <b>Equal or Over 70%</b> | <b>Equal or Over 80%</b> | <b>Equal or Over 90%</b> | <b>NA</b> | <b>Total</b> | <b>Percent from total (%)</b> |
|-------------------------------|------------------|--------------------------|--------------------------|--------------------------|--------------------------|-----------|--------------|-------------------------------|
| Anglian                       | 20               | 9                        | 8                        | 20                       | 777                      | 0         | 834          | 7%                            |
| Northumbrian                  | 43               | 28                       | 28                       | 88                       | 1210                     | 0         | 1397         | 12%                           |
| Severn Trent                  | 67               | 57                       | 94                       | 255                      | 1646                     | 0         | 2119         | 18%                           |
| South West                    | 18               | 17                       | 28                       | 73                       | 947                      | 0         | 1083         | 9%                            |
| Southern                      | 42               | 12                       | 11                       | 34                       | 830                      | 0         | 929          | 8%                            |
| Thames                        | 6                | 7                        | 8                        | 19                       | 417                      | 0         | 457          | 4%                            |
| United Utilities              | 20               | 10                       | 20                       | 42                       | 1790                     | 71        | 1953         | 17%                           |
| Wessex                        | 6                | 2                        | 5                        | 28                       | 981                      | 0         | 1022         | 9%                            |
| Yorkshire                     | 64               | 41                       | 76                       | 149                      | 1684                     | 0         | 2014         | 17%                           |
| <b>Total</b>                  | <b>286</b>       | <b>183</b>               | <b>278</b>               | <b>708</b>               | <b>10282</b>             | <b>71</b> | <b>11808</b> | <b>100%</b>                   |
| <b>Percent from total (%)</b> | <b>2%</b>        | <b>2%</b>                | <b>2%</b>                | <b>6%</b>                | <b>87%</b>               | <b>1%</b> | <b>100%</b>  |                               |

## Section 2. Method for connecting CSOs to their wastewater systems

Water company operating boundaries were acquired from OFWAT <sup>3</sup>. The 11,424 EDM CSOs consist of 11,151 unique permit numbers and locations with 273 of them having more than outlets and types (251 WWTW (both at the inlet and storm tank), 11 Sewer network - Pumping station, 7 WWTW a- Sewer network, 3 WWTW - Pumping station, 2 Sewer network - Sewer network). We developed a stepwise approach that helped up connect CSOs to WWTWs:

### 2,043 CSOs located at WWTWs:

A total 2,043 EDM CSOs are located at the WWTWs, and therefore were connected to their corresponding works based on permit number (i.e. they had the same permit number).

### 2,401 CSOs that belong to England's largest wastewater systems

Maps of 81 largest sewerage systems (i.e. with load entering 100,000 P.E. and above) for Anglian Water; Severn Trent; Southern Water; Thames Water; Wessex Water; Yorkshire Water were acquired from open access datasets and reports <sup>4-9</sup> and for Northumbria Water's Howdon and Hendon <sup>10</sup> were georeferenced, and their boundaries were digitised to join 2,401 CSOs to the corresponding WWTW by location.

### 6,707 CSOs that belong to large, medium and small wastewater systems (other than located at WWTWs)

For the remaining 6,707 CSOs, the connection of CSOs to WWTWs was based on digital vector boundaries for Parishes and Non-Civil Parished areas in England and Wales <sup>11</sup> and their distance from WWTWs. CSOs that belong to a parish with just one WWTW they were connected to the corresponding WWTW. CSOs that belong to a parish with multiple WWTWs, CSOs were connected to the closest WWTW within a radius of 500m and then the remaining to the WWTW with the highest DWF within the parish. The remaining CSOs that belong to a parish with not any WWTWs, were connected to the WWTW with max DWF among the neighbouring parishes.

The CSOs from both EDM 2021 and 2020 and the WWTWs that are connected to are shown in Electronic Supplementary Table 1. The accuracy of this approach was evaluated at 84%, by comparing our findings to a subset of 842 CSOs (7% of all EDM CSOs) for which data were available. By using the maximum spill duration reported amongst the CSOs connected to each system to indicate the spill duration per system, the accuracy of the approach can be higher, considering that our findings (see results) suggest that CSOs located at WWTWs had significantly higher average spill durations than those located on other parts of the sewer network.

### Section 3. Hydraulic capacity as FFT/DWF ratio per WWTWs

From the 5,187 WWTWs, 4,107 had data on Dry Weather Flow (DWF) and 2,200 on Full Flow to Treatment (FFT) (See Supplementary Table 3.1), while for 151 additional WWTWs the FFT was obtained from the weir setting of the CSO at the inlet of the WWTWs. The hydraulic capacity of each WWTWs was estimated via the "FFT/DWF" ratio (Electronic Supplementary Table 2).

*Supplementary Table 3.1 Wastewater treatment works (WWTWs) per sewerage company with data on Dry Weather Flow (DWF) and Full Flow to Treatment (FFT)*

| Water Company    | WWTWs  | WWTWs with DWF |                                    | WWTWs with FFT |
|------------------|--------|----------------|------------------------------------|----------------|
|                  | Number | Number         | Aggregated DWF (m <sup>3</sup> /d) | Number         |
| Anglian          | 1083   | 883            | 1,703,182.77                       | 414            |
| Northumbrian     | 328    | 225            | 923,589.11                         | 138            |
| Severn Trent     | 925    | 883            | 2,407,024.08                       | 421            |
| South-West       | 616    | 434            | 503,877.27                         | 228            |
| Southern         | 366    | 306            | 1,226,060.60                       | 184            |
| Thames           | 345    | 322            | 4,450,744.50                       | 50             |
| United Utilities | 563    | 312            | 2,727,807.10                       | 273            |
| Wessex           | 374    | 356            | 827,504.00                         | 214            |
| Yorkshire        | 587    | 386            | 1,510,277.80                       | 278            |
| Totals           | 5187   | 4107           | 16,280,067.23                      | 2,200          |

## Section 4. Wastewater systems with available data

Out of the 5,187 consented to discharge WWTWs owned by water companies in England, 2,724 WWTWs found to be connected to the 11,424 CSOs (or 2,531 WWTWs connected to 9,275 CSOs other than pumping stations) monitored during EDM 2021. All 2,531 systems were included in the analyses and used to investigate our hypothesis.

Of these, 2,064 WWTWs have both DWF and FFT data, of which 1,974 are connected to 7,154 CSOs that spilled during 2021 (from a total 8,056 CSOs that are connected to). These 1,974 systems correspond to 78% of all wastewater systems with EDM 2021 CSOs and was used in our analyses to investigate the extent to which increases in the frequency and duration of CSO spills are down to the lack of capacity of wastewater systems in the country (Table 3, Fig 3 of main text).

*Supplementary Table 4.1 Wastewater systems studied with CSOs monitored during 2021 EDM, categorised based on data availability for Dry Weather Flow (DWF) and Full Flow to Treatment (FFT), spills and size*

|                                       | WWTWs | CSOs    |       | WWTW        | WWTWs | CSOs    |       | WWTW Size | WWTWs | CSOs    |       |
|---------------------------------------|-------|---------|-------|-------------|-------|---------|-------|-----------|-------|---------|-------|
|                                       |       | Spilled | All   |             |       | Spilled | All   |           |       | Spilled | All   |
| <b>Systems with both DWF FFT data</b> | 2,064 | 7,154   | 8,149 | not Spilled | 90    | 0       | 93    | Large     | 47    | 0       | 49    |
|                                       |       |         |       |             |       |         |       | Small     | 43    | 0       | 44    |
|                                       |       |         |       | Spilled     | 1,974 | 7,154   | 8,056 | Large     | 1,248 | 6,258   | 7,114 |
|                                       |       |         |       |             |       |         |       | Small     | 726   | 896     | 942   |

|                                        | WWTWs | CSOs    |       | WWTW        | WWTWs | CSOs    |       | WWTW Size | WWTWs | CSOs    |     |
|----------------------------------------|-------|---------|-------|-------------|-------|---------|-------|-----------|-------|---------|-----|
|                                        |       | Spilled | All   |             |       | Spilled | All   |           |       | Spilled | All |
| <b>Systems without DWF or FFT data</b> | 467   | 982     | 1,126 | not Spilled | 36    | 0       | 39    | Large     | 12    | 0       | 12  |
|                                        |       |         |       |             |       |         |       | Small     | 24    | 0       | 27  |
|                                        |       |         |       | Spilled     | 431   | 982     | 1,087 | Large     | 232   | 624     | 695 |
|                                        |       |         |       |             |       |         |       | Small     | 199   | 358     | 392 |

Similarly, 2,546 WWTWs found to be connected to 10,610 CSOs (or 2,316 WWTWs connected to 8,257 CSOs other than pumping stations) monitored in 2020.

## Section 5. Method for estimating wastewater systems spill duration

In this section we present the comparison of aggregate spill duration of all CSOs in a system to the maximum spill duration between the CSOs of each system for both EDM 2021 and 2020 in Supplementary Tables 5.1 and 5.2 respectively. We classified the wastewater systems that spilled in 2021 and 2020 based on the number of CSOs (pumping stations excluded). For each group (CSOs per system) we provide: A) the mean spill duration based on the durations of all CSOs monitored per wastewater system (Mean aggregate duration), B) the system's mean spill duration on the duration of the CSO with the max spill duration per system (Mean max spill duration) and B) the ratio of the two variables, which indicates the percentage contribution of the max spilling CSO to the aggregated spill duration per system.

For works with up to four CSOs, the maximum and aggregated duration were found very similar, indicating that a single CSO drives a system's spill duration, releasing most of the excess flows when the system's hydraulic capacity is reached. In systems with a larger number of CSOs (mainly due to large spatial extend and agglomerations), the aggregated spill duration increases with the number of CSOs located on the network (accounting 73% of aggregated system durations, compared to 18% on storm tanks and 9% at the inlet of the works). The duration of the CSO with the maximum spill duration per system is therefore a better indicator to capture the link between the system's spill duration and its capacity.

For systems with one CSO spilling (1,375 systems), this is straightforward, as the duration the system spills is the one and the same with the CSO spilling. With 85% of the CSOs monitored (7,900 CSOs) being part of systems with more than one CSO, showing significant variation in CSO spill frequency and duration within each system, relating their frequency and duration to the operation of the system is more challenging.

Further we present the outputs from our analyses using the aggregated spill duration of CSOs per system for 2021. It includes:

Supplementary Table 5.3 that supplements the analyses presented in Table 2 (of the main text) can be used together with Supplementary Fig 5.1, which shows the comparison between two classification methods of wastewater systems for 2021.

Supplementary Fig 5.2 shows the aggregate spill duration of the CSOs (across several incidents) per wastewater system and per water company for 2021 – supplementing Fig 2 in the main text.

*Supplementary Table 5.1 Classification of wastewater systems that spilled in 2021 based on the number of CSOs (pumping stations excluded). For each group (CSOs per system) we provide the mean spill duration, based on the durations of all CSOs monitored per wastewater system (Mean aggregate duration), and on the duration of the CSO with the max spill duration per system (Mean max spill duration). We also provide the ratio of the two variables, which indicates the percentage contribution of the max spilling CSO to the aggregated spill duration per system.*

| CSOs per system (n) | Mean aggregate duration (h) | Mean max spill duration (h) | Systems (n) | Mean max spill duration / Mean aggregate duration |
|---------------------|-----------------------------|-----------------------------|-------------|---------------------------------------------------|
| 1                   | 574.87                      | 574.87                      | 1375        | 100%                                              |
| 2                   | 853.71                      | 729.60                      | 423         | 85%                                               |
| 3                   | 930.31                      | 726.76                      | 182         | 78%                                               |
| 4                   | 794.69                      | 590.15                      | 72          | 74%                                               |
| 5                   | 1,121.62                    | 712.52                      | 63          | 64%                                               |
| 6                   | 1,237.68                    | 855.49                      | 45          | 69%                                               |
| 7                   | 1,293.16                    | 728.48                      | 35          | 56%                                               |
| 8                   | 1,534.17                    | 777.99                      | 32          | 51%                                               |
| 9                   | 1,400.27                    | 761.76                      | 19          | 54%                                               |
| 10                  | 1,303.45                    | 623.10                      | 23          | 48%                                               |
| 11                  | 1,508.36                    | 560.91                      | 9           | 37%                                               |
| 12                  | 1,517.18                    | 720.84                      | 12          | 48%                                               |
| 13                  | 1,487.91                    | 790.33                      | 9           | 53%                                               |
| 14                  | 2,228.59                    | 877.38                      | 7           | 39%                                               |
| 15                  | 1,695.78                    | 913.25                      | 4           | 54%                                               |
| 16                  | 3,014.43                    | 1,813.40                    | 5           | 60%                                               |
| 17                  | 1,539.03                    | 650.68                      | 6           | 42%                                               |
| 18                  | 1,629.27                    | 700.07                      | 2           | 43%                                               |
| 19                  | 4,487.51                    | 2,410.59                    | 8           | 54%                                               |
| 20                  | 2,188.31                    | 1,113.41                    | 6           | 51%                                               |
| 21                  | 4,469.38                    | 733.03                      | 1           | 16%                                               |
| 22                  | 3,462.85                    | 1,039.19                    | 6           | 30%                                               |
| 23                  | 4,232.88                    | 2,113.85                    | 5           | 50%                                               |
| 24                  | 1,903.71                    | 565.37                      | 4           | 30%                                               |
| 25                  | 2,947.41                    | 1,073.07                    | 7           | 36%                                               |
| 26                  | 2,828.59                    | 1,212.07                    | 2           | 43%                                               |
| 27                  | 6,591.13                    | 2,850.69                    | 2           | 43%                                               |
| 30                  | 5,010.34                    | 1,157.40                    | 1           | 23%                                               |
| 31                  | 6,949.06                    | 1,981.97                    | 1           | 29%                                               |
| 33                  | 4,145.75                    | 845.47                      | 2           | 20%                                               |
| 34                  | 5,125.98                    | 1,365.86                    | 3           | 27%                                               |
| 37                  | 4,176.56                    | 1,204.00                    | 1           | 29%                                               |
| 38                  | 4,646.55                    | 1,251.80                    | 3           | 27%                                               |
| 40                  | 19,590.51                   | 4,110.41                    | 1           | 21%                                               |
| 41                  | 8,827.37                    | 4,902.75                    | 1           | 56%                                               |
| 46                  | 7,930.41                    | 2,471.03                    | 2           | 31%                                               |
| 47                  | 5,883.15                    | 886.92                      | 2           | 15%                                               |
| 48                  | 8,517.30                    | 1,911.06                    | 2           | 22%                                               |
| 49                  | 1,304.96                    | 349.69                      | 1           | 27%                                               |
| 50                  | 8,341.00                    | 1,110.80                    | 1           | 13%                                               |
| 52                  | 10,135.56                   | 1,134.14                    | 1           | 11%                                               |
| 53                  | 2,007.51                    | 465.60                      | 1           | 23%                                               |
| 57                  | 4,549.17                    | 934.20                      | 1           | 21%                                               |
| 58                  | 4,785.47                    | 1,028.20                    | 1           | 21%                                               |
| 60                  | 3,010.18                    | 685.24                      | 1           | 23%                                               |
| 61                  | 12,252.18                   | 1,924.17                    | 1           | 16%                                               |
| 64                  | 4,253.20                    | 973.33                      | 1           | 23%                                               |
| 71                  | 13,152.75                   | 2,273.89                    | 2           | 17%                                               |
| 88                  | 2,811.50                    | 656.80                      | 1           | 23%                                               |
| 105                 | 10,308.70                   | 1,053.80                    | 1           | 10%                                               |
| 106                 | 5,733.68                    | 1,023.24                    | 1           | 18%                                               |
| 108                 | 10,763.30                   | 1,914.15                    | 2           | 18%                                               |
| 117                 | 9,295.74                    | 1,733.20                    | 1           | 19%                                               |
| 126                 | 18,321.50                   | 3,243.60                    | 1           | 18%                                               |



---

|     |           |          |   |     |
|-----|-----------|----------|---|-----|
| 147 | 16,008.30 | 1,301.10 | 1 | 8%  |
| 183 | 7,373.00  | 1,154.90 | 1 | 16% |
| 233 | 4,905.56  | 570.90   | 1 | 12% |
| 238 | 29,124.08 | 4,396.75 | 1 | 15% |

---

*Supplementary Table 5.2 Classification of wastewater systems that spilled in 2020 based on the number of CSOs (pumping stations excluded). For each group (CSOs per system) we provide the mean spill duration, based on the durations of all CSOs monitored per wastewater system (Mean aggregate duration), and on the duration of the CSO with the max spill duration per system (Mean max spill duration). We also provide the ratio of the two variables, which indicates the percentage contribution of the max spilling CSO to the aggregated spill duration per system.*

| CSOs per system (n) | Mean aggregate duration (h) | Mean max spill duration (h) | Systems (n) | Mean max spill duration/<br>Mean aggregate duration |
|---------------------|-----------------------------|-----------------------------|-------------|-----------------------------------------------------|
| 1                   | 799.18                      | 799.18                      | 1149        | 100%                                                |
| 2                   | 1,043.00                    | 928.54                      | 263         | 89%                                                 |
| 3                   | 1,221.59                    | 1,031.05                    | 111         | 84%                                                 |
| 4                   | 1,438.50                    | 1,148.06                    | 73          | 80%                                                 |
| 5                   | 1,501.79                    | 1,100.39                    | 44          | 73%                                                 |
| 6                   | 1,575.46                    | 1,064.83                    | 29          | 68%                                                 |
| 7                   | 2,007.95                    | 1,290.98                    | 21          | 64%                                                 |
| 8                   | 1,097.19                    | 637.27                      | 25          | 58%                                                 |
| 9                   | 1,904.57                    | 975.99                      | 12          | 51%                                                 |
| 10                  | 1,706.98                    | 953.05                      | 10          | 56%                                                 |
| 11                  | 2,832.38                    | 1,912.33                    | 8           | 68%                                                 |
| 12                  | 2,803.75                    | 1,755.65                    | 10          | 63%                                                 |
| 13                  | 2,364.76                    | 1,329.74                    | 7           | 56%                                                 |
| 14                  | 2,452.20                    | 1,202.68                    | 4           | 49%                                                 |
| 15                  | 3,619.96                    | 1,178.18                    | 4           | 33%                                                 |
| 16                  | 2,451.63                    | 1,622.87                    | 4           | 66%                                                 |
| 17                  | 4,195.29                    | 1,690.30                    | 2           | 40%                                                 |
| 18                  | 3,186.81                    | 1,436.99                    | 5           | 45%                                                 |
| 19                  | 2,206.18                    | 746.67                      | 4           | 34%                                                 |
| 20                  | 2,664.94                    | 1,662.15                    | 2           | 62%                                                 |
| 21                  | 12,570.25                   | 3,316.41                    | 2           | 26%                                                 |
| 22                  | 2,964.54                    | 1,179.73                    | 2           | 40%                                                 |
| 23                  | 4,482.26                    | 1,594.76                    | 4           | 36%                                                 |
| 24                  | 4,286.51                    | 828.07                      | 1           | 19%                                                 |
| 25                  | 6,312.84                    | 1,635.78                    | 2           | 26%                                                 |
| 26                  | 8,149.85                    | 1,406.35                    | 4           | 17%                                                 |
| 27                  | 2,451.66                    | 545.73                      | 1           | 22%                                                 |
| 28                  | 8,813.78                    | 2,174.17                    | 1           | 25%                                                 |
| 29                  | 4,729.91                    | 1,406.51                    | 2           | 30%                                                 |
| 30                  | 6,519.77                    | 3,193.67                    | 1           | 49%                                                 |
| 32                  | 5,104.99                    | 1,429.38                    | 2           | 28%                                                 |
| 33                  | 4,571.16                    | 1,045.62                    | 2           | 23%                                                 |
| 34                  | 7,764.50                    | 5,276.70                    | 1           | 68%                                                 |
| 36                  | 4,248.49                    | 2,108.15                    | 2           | 50%                                                 |
| 37                  | 5,374.62                    | 1,004.21                    | 1           | 19%                                                 |
| 38                  | 5,802.21                    | 1,078.06                    | 3           | 19%                                                 |
| 39                  | 4,163.14                    | 1,152.89                    | 1           | 28%                                                 |
| 41                  | 6,369.16                    | 994.07                      | 1           | 16%                                                 |
| 42                  | 6,272.16                    | 2,220.27                    | 2           | 35%                                                 |
| 44                  | 14,228.06                   | 3,649.09                    | 1           | 26%                                                 |
| 49                  | 5,618.96                    | 1,228.32                    | 1           | 22%                                                 |
| 54                  | 7,031.89                    | 1,280.32                    | 1           | 18%                                                 |
| 55                  | 4,304.98                    | 811.06                      | 1           | 19%                                                 |
| 62                  | 15,464.64                   | 3,417.30                    | 1           | 22%                                                 |
| 77                  | 6,628.43                    | 1,707.00                    | 1           | 26%                                                 |
| 79                  | 9,541.83                    | 1,885.00                    | 1           | 20%                                                 |
| 85                  | 11,041.24                   | 2,094.10                    | 1           | 19%                                                 |
| 88                  | 12,336.32                   | 1,146.37                    | 1           | 9%                                                  |
| 90                  | 13,226.40                   | 3,748.00                    | 1           | 28%                                                 |
| 97                  | 15,723.67                   | 6,231.29                    | 1           | 40%                                                 |
| 119                 | 16,007.37                   | 1,879.78                    | 1           | 12%                                                 |
| 134                 | 9,553.05                    | 1,849.00                    | 1           | 19%                                                 |
| 178                 | 16,457.40                   | 3,693.30                    | 1           | 22%                                                 |
| 189                 | 17,669.40                   | 3,986.39                    | 1           | 23%                                                 |

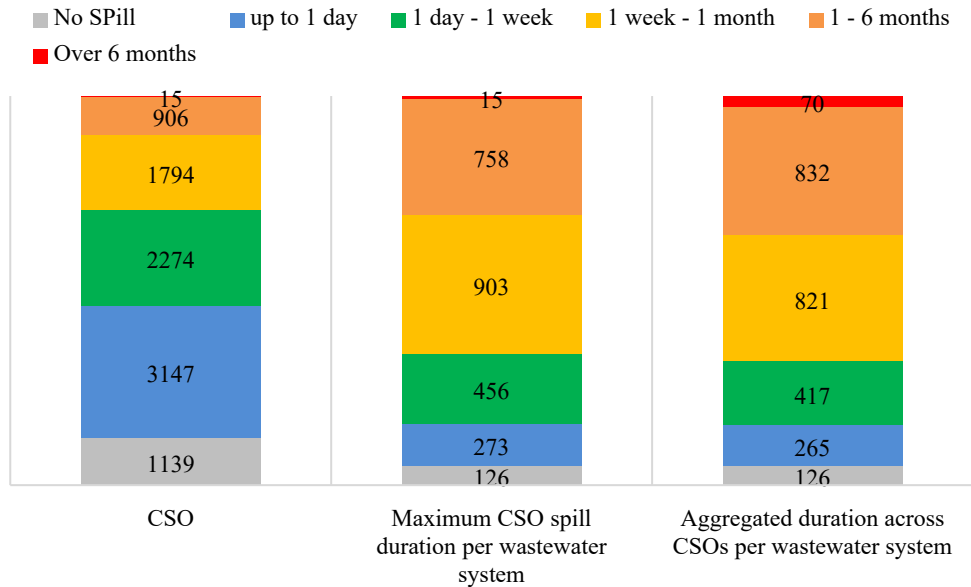

Supplementary Fig 5.1 Number of CSOs and wastewater systems (in 6 categories) based on aggregated spill duration across several incidents per CSO, and per system: i) based on the aggregated duration across the CSOs spilling in each system and ii) based on the CSO with maximum spill duration in each system, classified the following six categories: did not spill (no spill); spilled up to a day ( $\leq 1d$ ); spilled between a day and a week (1d-1w); spilled between a week and 1 month (1w-1m); spilled between 1 and 6 months (1m-6m); and spilled more than 6 months ( $> 6m$ ).

Supplementary Table 5.3 Classification of wastewater systems based on the aggregated spill duration of CSOs per system for 2021, as follows: did not spill (no spill); spilled up to a day ( $\leq 1d$ ); spilled between a day and a week (1d-1w); spilled between a week and 1 month (1w-1m); spilled between 1 and 6 months (1m-6m); and spilled more than 6 months ( $> 6m$ ).

| Classification of systems | Average number CSO per system (n) | No of systems | Mean duration (h) | ST          | I        | N           |
|---------------------------|-----------------------------------|---------------|-------------------|-------------|----------|-------------|
| No Spill                  | 1                                 | (126)         | 0                 |             |          |             |
| < 1d                      | 1                                 | 265           | 8.97              | 115         | 76       | 161         |
| 1d-1w                     | 2                                 | 417           | 86.25             | 251         | 128      | 300         |
| 1w-1m                     | 2                                 | 821           | 403.58            | 559         | 272      | 883         |
| 1m-6m                     | 4                                 | 832           | 1,601.97          | 682         | 267      | 2,575       |
| > 6m                      | 41                                | 70            | 7,424.28          | 65          | 33       | 2,776       |
| Total                     |                                   | 2,405         | 878.00            | 1,672 (18%) | 776 (9%) | 6,695 (73%) |

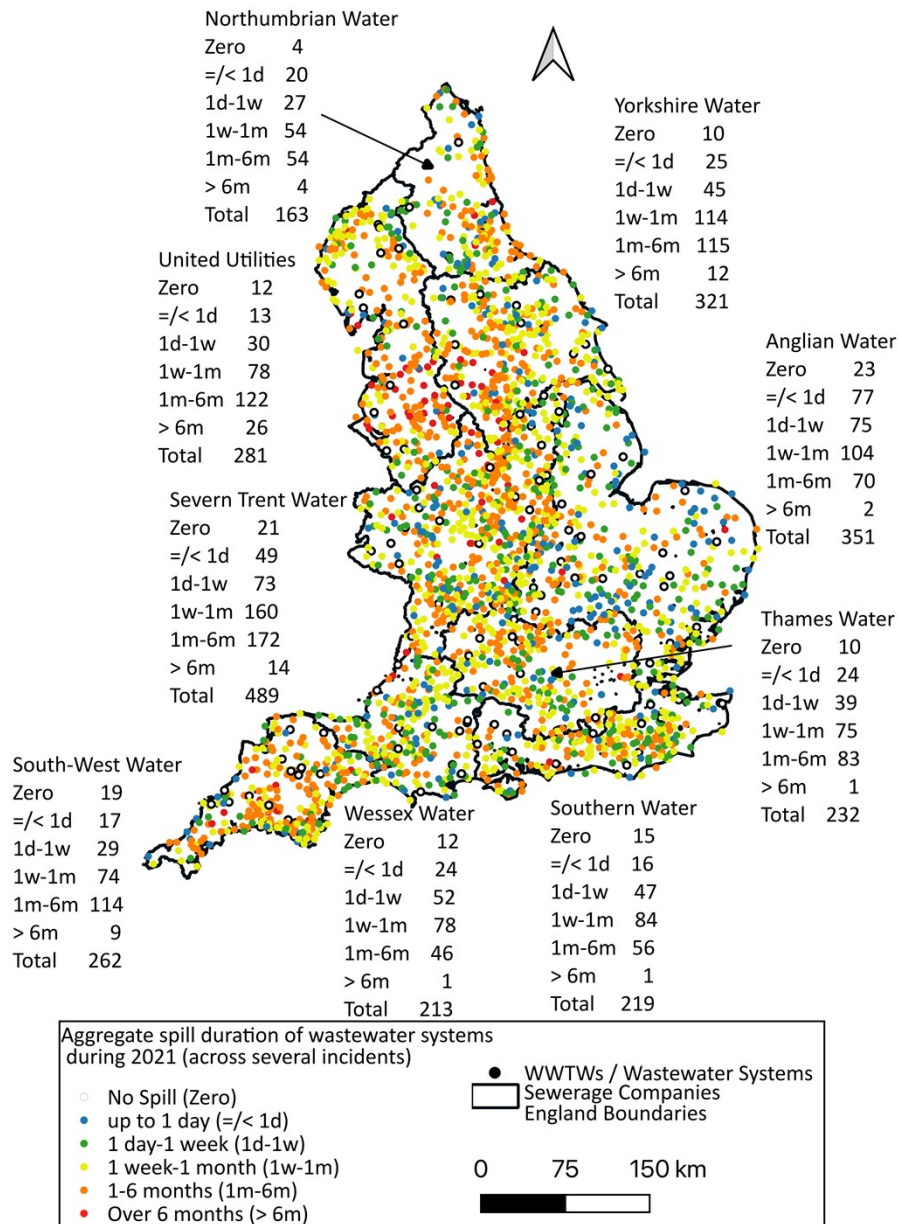

Supplementary Fig 5.2 Map of wastewater systems in England based on the location of their wastewater treatment works (WWTWs) showing the aggregate spill duration of their CSOs (across several incidents) per water company for 2021

## Section 6. Results for 2020

In this section, we present the figures and tables from the analyses of EDM 2020 datasets which is covered in the main text.

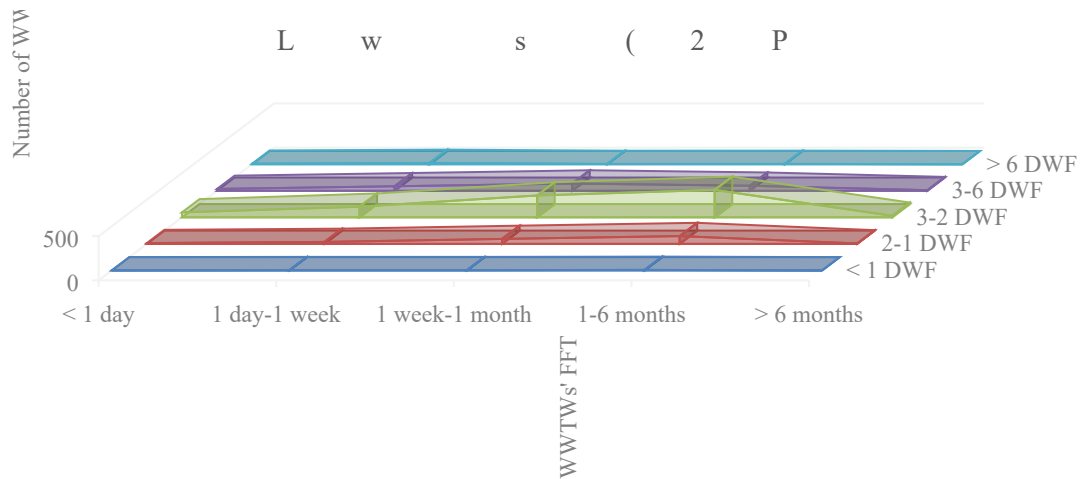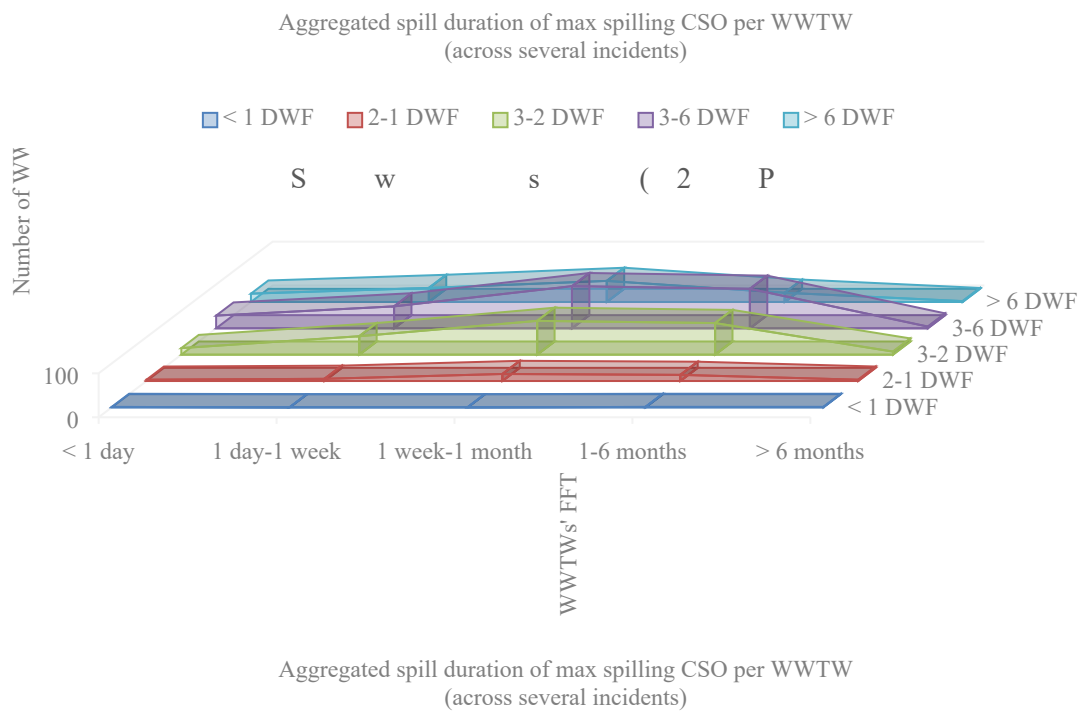

*Supplementary Figure 7.1 Spill duration of wastewater systems during 2020 and the Flow to Full Treatment (FFT) of their wastewater treatment works (WWTWs) expressed as multiples of Dry Weather Flow (DWF) in five categories: spilled up to a day ( $\leq 1d$ ); spilled between a day and a week ( $1d-1w$ ); spilled between a week and 1 month ( $1w-1m$ ); spilled between 1 and 6 months ( $1m-6m$ ); and spilled more than 6 months ( $> 6m$ ).*

Supplementary Table 7.1 Classification of wastewater systems spill duration in 2020 across five categories; spilled up to a day ( $\leq 1d$ ); spilled between a day and a week (1d-1w); spilled between a week and 1 month (1w-1m); spilled between 1 and 6 months (1m-6m); and spilled more than 6 months ( $> 6m$ ), and based on the type of their CSO (other than pumping stations) with the max spill duration in 2021 (as type I = Inlet, N = Network, ST = Storm Tank) related to the hydraulic capacity of each WWTWs, with Flow to Full Treatment (FFT) expressed as multiples of Dry Weather Flow (DWF).

| Size                | FFT     | DWF (m <sup>3</sup> /d) |          |           |              |      | No of WWTWs              |                  | CSOs | Mean duration per system (h) |
|---------------------|---------|-------------------------|----------|-----------|--------------|------|--------------------------|------------------|------|------------------------------|
|                     |         | Min                     | Median   | Mean      | Max          | CV   | Percentage (in brackets) |                  |      |                              |
| Large<br>> 2,000 PE | < 1 DWF | 1,070.00                | 8,400.00 | 29,731.85 | 171,140.00   | 175% | 13 (1%)                  |                  | 79   | 638.73                       |
|                     | 2-1 DWF | 290.00                  | 3,153.50 | 31,215.27 | 1,344,000.00 | 389% | 180 (19%)                | 943 (79%)        | 1368 | 1,238.53                     |
|                     | 3-2 DWF | 288.00                  | 2,224.00 | 8,024.15  | 340,000.00   | 267% | 750 (80%)                |                  | 3238 | 952.01                       |
|                     | 3-6 DWF | 291.00                  | 1,464.00 | 6,478.08  | 225,000.00   | 308% | 218 (89%)                | 246 (21%)        | 866  | 753.74                       |
|                     | > 6 DWF | 286.00                  | 505.00   | 1,840.25  | 28,129.00    | 286% | 28 (11%)                 |                  | 79   | 311.37                       |
|                     |         |                         |          | All       |              |      |                          | <b>1189</b>      |      | 5630                         |
| Small<br>< 2,000 PE | < 1 DWF | 72.00                   | 141.00   | 119.00    | 144.00       | 34%  | 3 (1%)                   |                  | 3    | 3,412.91                     |
|                     | 2-1 DWF | 18.00                   | 146.00   | 149.95    | 280.00       | 50%  | 41 (8%)                  | <b>257 (81%)</b> | 52   | 1,305.26                     |
|                     | 3-2 DWF | 7.00                    | 130.00   | 132.59    | 285.00       | 61%  | 213 (40%)                |                  | 266  | 970.67                       |
|                     | 3-6 DWF | 5.80                    | 117.00   | 122.95    | 285.00       | 63%  | 269 (51%)                |                  | 328  | 804.96                       |
|                     | > 6 DWF | 5.00                    | 75.00    | 88.84     | 275.00       | 77%  | 122 (19%)                |                  | 139  | 587.92                       |
|                     |         |                         |          | All       |              |      |                          | <b>648</b>       |      | 788                          |

## Section 7. The case of Beckton, Crossness and Mogden wastewater systems

In 2021, 62 CSOs (out of the 68 monitored) of the Becton sewerage network spilled, with the max spilling CSO (Beech Hall Crescent- permit number: CLCR.0032) spilling for 116 times to a total of 1,028 hours. In Crossness, 30 CSOs (out of the 31 monitored) spilled, with the max spilling CSO (Bell Lane Creek - permit number: TEMP.2438) spilling for 71 times to a total of 531.89 hours. In Mogden, 14 CSOs (out of the 21 monitored) spilled, with the CSO at the storm tank at the WWTWs (permit number: CNTD.0085) spilling for 43 times to a total of 438.3 hours. All three works (Becton, Crossness and Mogden) still have a hydraulic capacity of less than 2 DWFs.

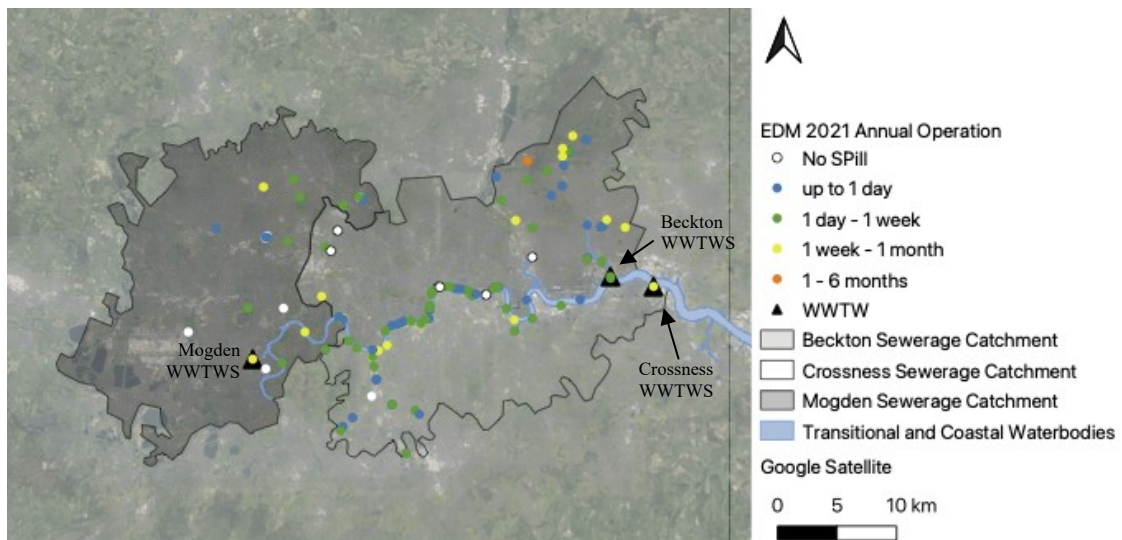

*Supplementary Fig 7.1. Map of Beckton, Crossness and Mogden wastewater systems showing the duration of spill events during 2021 EDM (across several incidents)*

## Section 8. Primary reason reported by the sewerage companies for the EDM CSOs with high spill frequency during 2021

*Supplementary Table 8.1. Primary reason reported by the sewerage companies for the EDM CSOs with high spill frequency during 2021*

| High Spill Frequency - Operational Review - Primary Reason                                                 | CSOs   |         |
|------------------------------------------------------------------------------------------------------------|--------|---------|
|                                                                                                            | Number | Percent |
| Data collection - Confirmed exceptional weather                                                            | 20     | 1.3%    |
| Data collection - EDM non-representative location                                                          | 33     | 2.1%    |
| Data collection - Tidal / river inundation                                                                 | 15     | 1.0%    |
| Not asset maintenance - Hydraulic capacity                                                                 | 1242   | 79.4%   |
| Performance - Asset configuration (e.g. PS/rising main/storm tanks)                                        | 78     | 5.0%    |
| Performance - Asset power failure                                                                          | 4      | 0.3%    |
| Performance - GW inundation                                                                                | 14     | 0.9%    |
| Performance - Infiltration                                                                                 | 114    | 7.3%    |
| Performance - Other maintenance / capital works (e.g. jetting)                                             | 23     | 1.5%    |
| Performance - Partial / no capacity due to blockage or restriction (e.g. roots / grid) - maintenance issue | 12     | 0.8%    |
| Performance - Pump failure / issue                                                                         | 10     | 0.6%    |
|                                                                                                            | 1565   | 100.0%  |



## References:

- 1 Environment Agency, Event Duration Monitoring - Storm Overflows - Annual Returns, <https://data.gov.uk/dataset/19f6064d-7356-466f-844e-d20ea10ae9fd/event-duration-monitoring-storm-overflows-annual-returns>.
- 2 Environment Agency, Consented Discharges to Controlled Waters with Conditions, <https://data.gov.uk/dataset/55b8eaa8-60df-48a8-929a-060891b7a109/consented-discharges-to-controlled-waters-with-conditions>.
- 3 OFWAT, 2021.
- 4 Southern Water, Drainage and Wastewater Management Plans, <https://www.southernwater.co.uk/dwmp/adur-and-ouse-catchment/options-development-and-appraisal-for-adur-and-ouse>.
- 5 Yorkshire Water, Yorkshire Water Risk Based Catchment Screening.
- 6 Wessex Water, Drainage and wastewater management plan, <https://www.wessexwater.co.uk/environment/drainage-and-wastewater-management-plan>.
- 7 Thames Water, Drainage and Wastewater Management Plan, <https://storymaps.arcgis.com/stories/201050209c7a4658a1c2265aa4411375>.
- 8 Severn Trent Water, *Drainage and Wastewater Management Plan*, 2019.
- 9 Anglian Water, The BRAVA scores for each water recycling catchment, <https://www.anglianwater.co.uk/about-us/our-strategies-and-plans/drainage-wastewater-management-plan/brava/level-3-map/>.
- 10 URS, North tyneside water cycle study appendices, <https://my.northtyneside.gov.uk/sites/default/files/web-page-related-files/Water Cycle Study Appendices.pdf>.
- 11 Office for National Statistics, Parish and Non Civil Parished Areas (December 2019) EW BFE.
